# Supplementary material for: Nutrition competencies for medicine: an integrative review and critical synthesis
Source: PubMed Central journal article supplement — BMJ Open. 2021 Mar 25;11(3):e043066. doi: 10.1136/bmjopen-2020-043066 (PMC7996665; doi:10.1136/bmjopen-2020-043066), 2021-03-25
Supplement: bmjopen-2020-043066.draft_revisions.pdf [file bmjopen-2020-043066.draft_revisions.pdf]

# BMJ Open

BMJ Open is committed to open peer review. As part of this commitment we make the peer review history of every article we publish publicly available.

When an article is published we post the peer reviewers' comments and the authors' responses online. We also post the versions of the paper that were used during peer review. These are the versions that the peer review comments apply to.

The versions of the paper that follow are the versions that were submitted during the peer review process. They are not the versions of record or the final published versions. They should not be cited or distributed as the published version of this manuscript.

BMJ Open is an open access journal and the full, final, typeset and author-corrected version of record of the manuscript is available on our site with no access controls, subscription charges or pay-per-view fees (<http://bmjopen.bmj.com>).

If you have any questions on BMJ Open's open peer review process please email [info.bmjopen@bmj.com](mailto:info.bmjopen@bmj.com)

# BMJ Open

## Nutrition Competencies for Medicine: A Critical Synthesis

|                               |                                                                                                                                                                                                                                                                                                                                                                                                                                                                                                     |
|-------------------------------|-----------------------------------------------------------------------------------------------------------------------------------------------------------------------------------------------------------------------------------------------------------------------------------------------------------------------------------------------------------------------------------------------------------------------------------------------------------------------------------------------------|
| Journal:                      | <i>BMJ Open</i>                                                                                                                                                                                                                                                                                                                                                                                                                                                                                     |
| Manuscript ID                 | bmjopen-2020-043066                                                                                                                                                                                                                                                                                                                                                                                                                                                                                 |
| Article Type:                 | Original research                                                                                                                                                                                                                                                                                                                                                                                                                                                                                   |
| Date Submitted by the Author: | 29-Jul-2020                                                                                                                                                                                                                                                                                                                                                                                                                                                                                         |
| Complete List of Authors:     | Lepre, Breanna; University of Wollongong, School of Medicine; NNEdPro Global Centre for Nutrition and Health, Mansfield, Kylie; University of Wollongong, School of Medicine, University of Wollongong, and Illawarra Health & Medical Research Institute<br>Ray, Sumantra; NNEdPro Global Centre for Nutrition and Health, St. John's Innovation Centre<br>Beck, Eleanor; University of Wollongong, School of Medicine, University of Wollongong and Illawarra Health & Medical Research Institute |
| Keywords:                     | MEDICAL EDUCATION & TRAINING, NUTRITION & DIETETICS, EDUCATION & TRAINING (see Medical Education & Training)                                                                                                                                                                                                                                                                                                                                                                                        |
|                               |                                                                                                                                                                                                                                                                                                                                                                                                                                                                                                     |

SCHOLARONE™  
Manuscripts

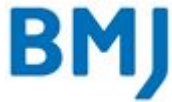

I, the Submitting Author has the right to grant and does grant on behalf of all authors of the Work (as defined in the below author licence), an exclusive licence and/or a non-exclusive licence for contributions from authors who are: i) UK Crown employees; ii) where BMJ has agreed a CC-BY licence shall apply, and/or iii) in accordance with the terms applicable for US Federal Government officers or employees acting as part of their official duties; on a worldwide, perpetual, irrevocable, royalty-free basis to BMJ Publishing Group Ltd ("BMJ") its licensees and where the relevant Journal is co-owned by BMJ to the co-owners of the Journal, to publish the Work in this journal and any other BMJ products and to exploit all rights, as set out in our [licence](#).

The Submitting Author accepts and understands that any supply made under these terms is made by BMJ to the Submitting Author unless you are acting as an employee on behalf of your employer or a postgraduate student of an affiliated institution which is paying any applicable article publishing charge ("APC") for Open Access articles. Where the Submitting Author wishes to make the Work available on an Open Access basis (and intends to pay the relevant APC), the terms of reuse of such Open Access shall be governed by a Creative Commons licence – details of these licences and which [Creative Commons](#) licence will apply to this Work are set out in our licence referred to above.

Other than as permitted in any relevant BMJ Author's Self Archiving Policies, I confirm this Work has not been accepted for publication elsewhere, is not being considered for publication elsewhere and does not duplicate material already published. I confirm all authors consent to publication of this Work and authorise the granting of this licence.

## Nutrition Competencies for Medicine: A Critical Synthesis

For peer review only

**Corresponding Author:****Breanna Lepre**Email: [bl778@uowmail.edu.au](mailto:bl778@uowmail.edu.au)

School of Medicine, University of Wollongong, and Illawarra Health & Medical  
Research Institute, Northfields Ave, Wollongong NSW 2522, Australia

NNEdPro Global Centre for Nutrition and Health, St. John's Innovation Centre, Cowley  
Road, Cambridge CB4 0WS, UK

**Co-Author(s):****1. Kylie J Mansfield**

School of Medicine, University of Wollongong, Wollongong NSW 2522, Australia

**2. Shumone (Sumantra) Ray**

NNEdPro Global Centre for Nutrition and Health, St. John's Innovation Centre, Cowley  
Road, Cambridge, UK

**3. Eleanor J Beck**

School of Medicine, University of Wollongong and Illawarra Health & Medical Research  
Institute, Wollongong NSW 2522, Australia

**Word Count (excluding title page, abstract, references, figures and tables): 3630**

## ABSTRACT

**Background:** Globally, 11 million deaths are attributable to suboptimal diet annually, and nutrition care has been shown to improve health outcomes. While medically trained clinicians are well-placed to provide nutrition care, medical education remains insufficient to support clinicians to deliver nutrition advice as part of routine clinical practice. Competency standards provide a framework for workforce development and a vehicle for aligning health priorities with the values of a profession. Albeit, there remains an urgent need to establish consensus on nutrition competencies for medicine. The aim of this review is to provide a critical synthesis of published nutrition competencies for medicine internationally.

**Design:** Integrative review.

**Methods:** CINAHL, Medline, Embase, Scopus, Web of Science and Global Health were searched for published nutrition competency frameworks. This search was complemented by handsearching reference lists of literature deemed relevant. Data were extracted into summary tables and this matrix was then used to identify common themes and to compare and analyse the literature. Miller's pyramid, the Knowledge to Action cycle and the Dreyfus model of skill acquisition were also used to consider the results of this review.

**Findings:** Using a pre-determined search strategy, 11 articles were identified. Five common themes were identified and include 1) clinical practice, 2) health promotion and disease prevention, 3) communication, 4) working as a team and 5) professional practice. This review also identified twenty-five nutrition competencies for medicine, the majority of which were knowledge-based.

**Conclusions:** This review recommends vertical integration of nutrition competencies into existing medical education based on key, cross-cutting themes, and increased opportunities to engage in relevant, skill-based nutrition training.

**Keywords:** Competency-based education, Medical education, Nutrition competencies, Nutrition education

### STRENGTHS AND LIMITATIONS OF THIS STUDY

- This review offers a critical and timely synthesis of medical nutrition competencies and a conceptual nutrition competency framework.
- Themes such as communication and team work are not specific to nutrition and highlight integration of topics across a curriculum.
- As an integrative review, this framework might be considered a candidate theory for further review and development.
- It is recognized that the characteristics of included publications is skewed towards those published in the USA and that there may be other frameworks internationally. However, it is relevant to note that there are a greater number of medical education facilities in the USA than other countries included such as Australia, New Zealand and Sweden (1).
- The dynamic nature of competency-based research, and subsequent differences in competency frameworks included may also be considered a limitation.

## INTRODUCTION

Globally, 11 million deaths are attributable to suboptimal diet annually (2). Nutrition is a powerful tool for the prevention and management of diet-related chronic diseases (2). Nutrition care refers to any intervention performed by a health professional to improve the nutrition behaviour and subsequent health status of an individual or community, and has been shown to improve diet-related and health outcomes, often with reduced risk, side effects and costs when compared with pharmacological interventions (3, 4). For example, when doctors provide nutrition advice as part of prenatal care, their patients have fewer complications associated with pregnancy and give birth to healthier children (5). In fact, a recent systematic analysis reports that improvement of diet could potentially prevent one in every five deaths globally (2). Furthermore, public health legislation such as the Patient Protection and Affordable Care Act recognise the increased need for preventive healthcare interventions, such as nutrition care (6). Therefore, it is essential that clinicians of all backgrounds are cognizant of the role of nutrition in health and are well-equipped to initiate and support nutrition care as part of routine clinical practice.

Medically trained clinicians are well-placed to initiate and support patient nutrition care (7), in part due to their regular contact with the individuals for whom they provide care (8). Despite this, a recent systematic review indicates that medical education remains insufficient to support clinicians to provide nutrition care as part of routine clinical practice (9). Competency standards provide a framework for workforce development and are essential for the delivery of safe, effective and patient-centred care (10) and a vehicle for aligning the health priorities of the country with the values of a profession (11). This is particularly relevant, as there is an existing disconnect between medical education and the exigent double burden of malnutrition (9). While there are many approaches to developing a competency framework, authors argue that a preoccupation with discipline-specific tasks overlooks the relevance of cross-cutting attributes such as critical thinking, communication and collaboration which align outcomes across disciplines (10, 12). An integrated approach to competency encompasses the ability to combine and apply practical and reflexive competence in different contexts (12). The use of competency standards in improving medical nutrition education has been previously established (13) and has been shown to increase a clinician's ability to integrate nutrition into patient care (4). Competency in nutrition care is important in the delivery of safe, effective and co-ordinated care (14). However, there is a recognised need to establish consensus on relevant



1  
2  
3 nutrition competencies for medicine (9). The aim of this review is to provide a critical synthesis  
4 of published nutrition competencies for medicine internationally. As the UN *Decade of Action*  
5 *on Nutrition 2016-2025* is well underway, this is a timely and important review (13).  
6  
7  
8

## 9 10 **METHODS**

11  
12  
13 This review was an integrative literature review, a “form of research that reviews, critiques and  
14 synthesises representative literature on a topic in an integrated way such that new frameworks  
15 and perspectives on the topic are generated” (15). This methodology is considered rigorous in  
16 this context (16, 17). Data were extracted into summary tables (16) and this matrix was then  
17 used to identify common themes and compare, contrast and analyse the literature (18). Miller’s  
18 pyramid, the Knowledge to Action cycle and the Dreyfus model of skill acquisition were also  
19 used to consider the results of this review (19-21).  
20  
21  
22  
23  
24

25  
26  
27 For the purposes of this review, we initially defined key concepts based on published  
28 definitions and author experience (Table 1).  
29  
30  
31

32 **Table 1. Definitions of key concepts used within this review**

| 34 <b>Concept</b>                      | 34 <b>Definition</b>                                                                                                                                                                                                                                                                                                                            |
|----------------------------------------|-------------------------------------------------------------------------------------------------------------------------------------------------------------------------------------------------------------------------------------------------------------------------------------------------------------------------------------------------|
| 35 Competency (or competency standard) | 35 A measure used to describe the idealized<br>36 capacity of an individual to perform a role or<br>37 set of tasks (22).<br>38                                                                                                                                                                                                                 |
| 39 Competence                          | 39 Competence can be described as the ability<br>40 to perform a task with desirable outcomes<br>41 under varied circumstances. This definition<br>42 encompasses multiple components such as<br>43 the habitual and judicious application of<br>44 knowledge, technical skills, values, clinical<br>45 reasoning and attitudes (23, 24).<br>46 |
| 47 Domains of competence               | 47 Competency domains represent organised<br>48 clusters of competencies which are intended<br>49 to characterise a central aspect of<br>50 professional practice in which a professional<br>51 should be competent (25).<br>52                                                                                                                 |
| 53 Competency framework                | 53 A competency framework represents a<br>54 complete collection of competencies<br>55 required for effective performance (10).<br>56                                                                                                                                                                                                           |
| 57 Curriculum framework                | 57 A curriculum framework is an organised set<br>58 of standards or learning objectives that<br>59 define educational requirements<br>60                                                                                                                                                                                                        |

## Search methods

CINAHL, Medline, Embase, Scopus, Web of Science and Global Health were searched for published nutrition competency frameworks by adapting the Search Strategy in Appendix 1. In brief, the key concepts were related to medically trained clinicians, nutrition and diet and competency. A research team comprised of all authors in this study, as well as a medical librarian, agreed upon terms with the aim of avoiding researcher bias when selecting articles. This search was complemented by handsearching reference lists of literature deemed relevant.

Inclusion criteria for this review were original research publications representing nutrition competencies for the continuum of medical education, from undergraduate medicine through to practice. Interdisciplinary nutrition competency frameworks were included if the framework stipulated use by the medical profession. Frameworks which included elements of nutrition, but which are not nutrition-specific, were excluded for the purpose of this review. Frameworks which included nutrition competencies but are specific to a disease, condition or specialty (e.g. nutrition competencies for cardiovascular disease) of the medical profession were also excluded. While these frameworks may inform discussion related to the integration of nutrition in medical competency frameworks, the aim was to review nutrition competencies to inform the development of a nutrition competency framework for the broad medical workforce in the first instance. Where an updated version of a framework existed, we excluded previous versions of the framework. Editorials, reviews, conference proceedings, opinion papers and interviews were also excluded. The results of the search were not limited by time or language.

## Search outcome

All database searches were directly imported into the electronic reference management tool Endnote<sup>®</sup> Version X9 (Clarivate Analytics, Philadelphia, USA) and grey literature searches were manually entered by the primary author (BL). After the removal of duplicates using EndNote and manually, one author (BL) independently screened titles and abstracts and selected studies according to the pre-defined inclusion criteria. If the abstract was not sufficient, full-texts of remaining papers were screened independently to identify publications for inclusion. Where it was not clear, the primary author engaged in consultative and iterative discussion amongst authors in order to reach consensus. All authors reached consensus on the included articles.

## Data analysis

Data extraction was completed independently by the primary researcher (BL). Information relating to nutrition competencies was extracted from the retained articles. Information discussing the nutrition-related knowledge, skills or attitudes which published authors believed medical practitioners needed to obtain was categorised as a competency and recorded. Similarly, competency domains or themes represent organised clusters of competencies which are intended to characterise a central aspect of professional practice in which a professional should be competent (25). Information related to competency domains was also included. Data was extracted from each paper into a summary table and series of matrices. The following information was extracted from full-text publications and presented systematically: citation and country, organisation/group, name of the framework, nutrition domains (if stated), nutrition competencies, learning objectives (if stated) and the level of medical education that the framework is intended for (e.g. residency). Findings were read, re-read and articles compared and contrasted to identify patterns and relationships.

## Quality appraisal

To determine quality and risk of bias for review, the full text of each article was assessed independently for quality (including risk of bias) by the primary researcher (BL). Given the variation in research methodologies, the Critical Appraisal Skills Programme (CASP) tool was modified for use, as adapted by Halcomb et al. (2016) (CASP, 2019; Halcomb et al., 2016).

## Patient and Public Involvement

There is no patient and public involved in the study.

## RESULTS

### Search results

The total yield from all databases was 19,709 results. This was reduced to 14,023 results after the removal of duplicates, of which there were many. Using the exclusion criteria against title

1  
2  
3 and abstract, a total of 56 full-text publications were assessed for eligibility, including four  
4 publications identified through hand searching of reference lists (Figure 1). It is of interest to  
5 note that a considerable number of results were related to the impact of a nutrition course or  
6 competency framework on nutrition knowledge, skills and attitudes and therefore not eligible  
7 for inclusion. Following full-text review, 11 articles were included in the review. Reasons for  
8 exclusion included papers which did not include competencies or a framework (n=18) and  
9 competencies that are not specific to nutrition or competencies for a specific aspect of nutrition  
10 or health care (for example cardiovascular disease nutrition competencies) (n=15).  
11  
12  
13  
14  
15  
16  
17  
18  
19  
20  
21  
22  
23  
24  
25  
26  
27  
28  
29  
30  
31  
32  
33  
34  
35  
36  
37  
38  
39  
40  
41  
42  
43  
44  
45  
46  
47  
48  
49  
50  
51  
52  
53  
54  
55  
56  
57  
58  
59  
60

**Figure 1. PRISMA flow diagram for identification of articles related to nutrition competencies for medicine.**

For peer review only

1  
2  
3  
4  
5  
6  
7  
8  
9  
10  
11  
12  
13  
14  
15  
16  
17  
18  
19  
20  
21  
22  
23  
24  
25  
26  
27  
28  
29  
30  
31  
32  
33  
34  
35  
36  
37  
38  
39  
40  
41  
42  
43  
44  
45  
46  
47  
48  
49  
50  
51  
52  
53  
54  
55  
56  
57  
58  
59  
60

## Characteristics of included publications

Included studies were published between 1983 and 2019. The majority were peer-reviewed articles (n=7), with the remaining grey literature comprising of documented frameworks from expert professional groups (for example, professional associations or accrediting bodies) (n=3) and a position statement (n=1). Seven studies were from the USA, with one study from each of Australia and New Zealand, Africa, Sweden and the UK.

## Quality appraisal

Descriptions of how the competency frameworks were developed varied in level of detail. It is important to note that few publications reported the research methods used to develop their frameworks. Furthermore, few publications acknowledged the limitations or weaknesses of the processes used to develop the competency frameworks. Given these limitations, articles that did not achieve a 'yes' on all items of the checklist were not excluded from the review, but the appraisal was taken into consideration in the overall rigour of the present review (Table 2).

**Table 2. Quality appraisal**

|                                                                                  | Q1  | Q2      | Q3      | Q4  | Q5 | Q6  |
|----------------------------------------------------------------------------------|-----|---------|---------|-----|----|-----|
| 1. Was the research design appropriate to address the aims of the research?      |     |         |         |     |    |     |
| 2. Was the data collected in a way that addressed the research issue?            |     |         |         |     |    |     |
| 3. Was the data analysis sufficiently rigorous?                                  |     |         |         |     |    |     |
| 4. Is there a clear statement of the study findings?                             |     |         |         |     |    |     |
| 5. Are there limitations or weaknesses of the study acknowledged?                |     |         |         |     |    |     |
| 6. Is the research valuable?                                                     |     |         |         |     |    |     |
| American Academy of Family Physicians, 1998                                      |     | Unclear |         | Yes | No | Yes |
| Asp et al., 1995                                                                 |     | Unclear |         |     |    | Yes |
| Cuerda et al., 2019                                                              | Yes | Yes     | Unclear | Yes | No | Yes |
| Deen, Karp & Lowell, 1994                                                        |     | Unclear |         | Yes | No | Yes |
| Deakin University Strategic Teaching and Learning Grant Steering Committee, 2016 | Yes | Yes     | Unclear |     | No | Yes |

|                                                                   |         |     |     |     |     |     |
|-------------------------------------------------------------------|---------|-----|-----|-----|-----|-----|
| Jhpiego & Save the Children, 2012                                 | Yes     | Yes | Yes | Yes | No  | Yes |
| Lindsley et al., 2017                                             | Yes     | Yes | Yes | Yes | No  | Yes |
| Maillet & Young, 1998                                             | Unclear |     |     | Yes | No  | Yes |
| Sierpina et al., 2016                                             | Unclear |     |     | Yes | Yes |     |
| Young et al., 1983                                                | Yes     | Yes | Yes | Yes | Yes | Yes |
| ICGN Undergraduate Nutrition Education Implementation Group, 2013 | Unclear |     |     |     |     | Yes |

### Competency domains

Five of eleven publications (45%) explicitly used competency domains to categorise or sub-divide nutrition competencies. Different methods of classification, or domains, included type of competency (such as knowledge, skills and attitudes), domains of human nutrition (including concepts of basic nutrition, concepts of applied nutrition and principles of clinical nutrition) and sub-division of competencies by nutrition concept (for example, macronutrients and micronutrients) or by elements of nutrition care (for example, diagnosis, treatment, prevention) (26-31). The most common competency domains were related to the role of nutrition in health promotion and disease prevention (n=3), nutrition assessment (n=2) and nutrition management (n=2) (27, 28, 30). Competency domains which were identified but only found within one framework included those related to patient nutrition counselling skills, nutrition referral, nutrition evidence, aspects of critical nutrition care (such as enteral and parenteral nutrition) and the impact of disease on nutrition (27, 30).

The Nutrition Competency Framework (NCF) for medical graduates, developed by the Deakin University Strategic Teaching and Learning Grant Steering Committee in Australia, was the only framework in this review purposefully mapped to a medical framework, namely, the Australian Medical Council (AMC) Graduate Outcome Statements (29, 32). Other frameworks in this review, published in the United Kingdom, are endorsed by statutory bodies such as the General Medical Council (GMC) and Medical Schools Council (30, 33, 34). Some interdisciplinary nutrition competency frameworks also delineated competencies, such as by amount of patient education responsibility or by level of service delivery, to emphasise the relevance of nutrition competencies for the wider health workforce (35, 36).

1  
2  
3 It is clear that despite differences in the taxonomy and language across included nutrition  
4 competencies for medical education, there are some common underlying themes, which in  
5 some contexts may be considered “domains” if the papers are summarised. Specifically, five  
6 common themes were identified across the included nutrition competencies, including clinical  
7 practice (all 11 publications), health promotion and disease prevention (n=8), communication  
8 (n=7), working as a team (n=7) and professional practice (n=3). These themes overlap with  
9 existing medical competency standards and could be considered cross-cutting.  
10  
11  
12  
13  
14  
15  
16

## 17 **Competencies**

18  
19  
20 Twenty-five unique nutrition competencies for medical education were identified in the 11  
21 publications. Fifteen of twenty-five nutrition competencies for medicine were classified as  
22 knowledge/behaviour-based competencies. For example, ‘Demonstrate knowledge of the  
23 functions of essential nutrients’ (27, 31). Seven nutrition competencies were classified as skill-  
24 based (for example, ‘Demonstrate ability to select and prescribe dietary strategies in the  
25 prevention and treatment of disease’ (27, 29-31, 35-39)) and only four competencies were  
26 attitude/value-based (for example, ‘Demonstrate sensitivity to the social, cultural, emotional,  
27 and psychological factors that may affect an individual’s nutrition behavior and health status’  
28 (27) (Table 4). The most common nutrition competencies (suggested in greater than 50% of  
29 articles), were related to 1) skills in nutrition assessment, 2) the ability to prescribe dietary  
30 interventions in the prevention and treatment of disease, 3) knowledge of the role of nutrition  
31 in health promotion and disease prevention and 4) knowledge of the social and cultural  
32 importance of food, including food consumption trends and current nutrition  
33 recommendations. Authors less commonly suggested the relevance of demonstrating  
34 competency in how disease can affect nutritional status, food-borne illness, an awareness of  
35 personal health and nutrition and a commitment to provide evidence-based nutrition care for  
36 all patients regardless of health status. Articles published in developed countries were more  
37 likely to recommend competencies related to nutritional management of chronic diseases,  
38 while studies originating from developing countries included competencies related to  
39 emergency medicine and nutritional management for people living with HIV and AIDS (27,  
40 36). One paper specified cross-cutting nutrition competencies for all health professionals  
41 including community mobilisation and nutrition counselling (36).  
42  
43  
44  
45  
46  
47  
48  
49  
50  
51  
52  
53  
54  
55  
56  
57  
58  
59  
60



**Table 3. Nutrition competencies for medicine**

| Theme and number of publications which include this theme | Domain                                 | Competency                                                                                                                                                                               | Competency Type     | n <sup>a</sup> |
|-----------------------------------------------------------|----------------------------------------|------------------------------------------------------------------------------------------------------------------------------------------------------------------------------------------|---------------------|----------------|
| Clinical Practice<br>n=11 (100%)                          | Nutrition Assessment                   | Demonstrate skills in the assessment of nutritional health including the ability to calculate energy expenditure, nutrition requirements and body composition (14, 26, 27, 29-31, 35-39) | Skill               | 11             |
|                                                           | Nutrition management                   | Demonstrate knowledge of evidence-based dietary strategies for prevention and treatment of disease (14, 26, 27, 29)                                                                      | Knowledge/Behaviour | 4              |
|                                                           |                                        | Demonstrate ability to select and prescribe dietary strategies in the prevention and treatment of disease (27, 29-31, 35-39)                                                             | Skill               | 9              |
|                                                           |                                        | Demonstrate knowledge of possible drug-nutrient interactions and prescribe accordingly (14, 26, 27, 31, 37)                                                                              | Skill               | 5              |
|                                                           |                                        | Demonstrate knowledge of breastfeeding and complementary feeding practices (27, 36)                                                                                                      | Knowledge/Behaviour | 2              |
|                                                           | Nutrition monitoring and evaluation    | Demonstrate the ability to monitor nutrition status and modify dietary recommendations as needed (37, 38)                                                                                | Skill               | 2              |
| Health promotion and disease prevention<br>n=8 (73%)      | Basic sciences as applied to nutrition | Demonstrate knowledge of the basic scientific principles of human nutrition (26, 27, 29)                                                                                                 | Knowledge/Behaviour | 3              |
|                                                           |                                        | Demonstrate knowledge of nutrition applied to different stages of the life cycle (26, 27, 31)                                                                                            | Knowledge/Behaviour | 3              |
|                                                           |                                        | Demonstrate awareness of the nutritional content of food including the major dietary sources of macronutrients and micronutrients (26, 27, 31)                                           | Knowledge/Behaviour | 3              |
|                                                           |                                        | Demonstrate knowledge of the difference between food allergies and food intolerance (26, 27, 31)                                                                                         | Knowledge/Behaviour | 3              |
|                                                           |                                        | Demonstrate knowledge of the functions of essential nutrients (27, 31)                                                                                                                   | Knowledge/Behaviour | 2              |

|                                    |                                                                                                                                                                 |                                                                                                                                                                                    |                                                                                                             |       |
|------------------------------------|-----------------------------------------------------------------------------------------------------------------------------------------------------------------|------------------------------------------------------------------------------------------------------------------------------------------------------------------------------------|-------------------------------------------------------------------------------------------------------------|-------|
|                                    |                                                                                                                                                                 | Demonstrate an understanding of how disease and its management can affect nutritional status (30)                                                                                  | Knowledge/Behaviour                                                                                         | 1     |
|                                    | The role of nutrition in health promotion and disease prevention                                                                                                | Demonstrate an awareness of their own personal health and nutrition (14)                                                                                                           | Attitude/Value                                                                                              | 1     |
|                                    |                                                                                                                                                                 | Demonstrate knowledge of the role of nutrition in health promotion and disease prevention (26, 27, 29-31, 35, 39)                                                                  | Knowledge/Behaviour                                                                                         | 7     |
|                                    |                                                                                                                                                                 | Demonstrate knowledge of the social and cultural importance of food, including awareness of food consumption trends and current nutrition recommendations (14, 26, 27, 29, 31, 39) | Knowledge/Behaviour                                                                                         | 6     |
|                                    |                                                                                                                                                                 | Demonstrate knowledge of nutrition-related causes of mortality and morbidity in the population (14, 26, 39)                                                                        | Knowledge/Behaviour                                                                                         | 3     |
|                                    |                                                                                                                                                                 | Demonstrate knowledge of the principles of public health nutrition, including strategies to reduce the burden of disease (27, 36)                                                  | Knowledge/Behaviour                                                                                         | 2     |
|                                    |                                                                                                                                                                 | Describe food-borne illnesses and outline the process of reporting and investigating outbreaks of these illnesses (27)                                                             | Knowledge/Behaviour                                                                                         | 1     |
| Communication<br>n=7 (64%)         |                                                                                                                                                                 | Nutrition counselling skills                                                                                                                                                       | Demonstrate the ability to effectively provide nutrition education and counselling (14, 26, 27, 31, 35, 38) | Skill |
|                                    | Demonstrate sensitivity to the social, cultural, emotional, and psychological factors that may affect an individual's nutrition behavior and health status (27) |                                                                                                                                                                                    | Attitude/Value                                                                                              | 2     |
| Working as a team<br>n=7 (64%)     | The Multidisciplinary Team Approach to nutrition care                                                                                                           | Demonstrate the ability to work effectively in a multidisciplinary team to deliver nutrition care, including the ability to refer onwards (14, 27, 29, 35, 37)                     | Skill                                                                                                       | 5     |
|                                    |                                                                                                                                                                 | Demonstrate knowledge of the role of other health professionals and community services in the multidisciplinary approach to nutrition care (27, 31, 39)                            | Knowledge/Behaviour                                                                                         | 3     |
| Professional Practice<br>n=3 (27%) | Critical thinking                                                                                                                                               | Demonstrate ability to think critically including the ability to interpret nutrition evidence and apply appropriately in clinical practice (14, 27, 29, 31, 38)                    | Skill                                                                                                       | 3     |
|                                    | Ethics                                                                                                                                                          | Demonstrate the ability to consider and apply principles of ethics related to nutritional management (26, 27, 29)                                                                  | Attitude/Value                                                                                              | 2     |

1  
2  
3  
4  
5  
6  
7  
8  
9  
10  
11  
12  
13  
14  
15  
16  
17  
18  
19  
20  
21  
22  
23  
24  
25  
26  
27  
28  
29  
30  
31  
32  
33  
34  
35  
36  
37  
38  
39  
40  
41  
42  
43  
44  
45  
46

|  |  |                                                                                                                                                                     |                |   |
|--|--|---------------------------------------------------------------------------------------------------------------------------------------------------------------------|----------------|---|
|  |  | Demonstrate a commitment to promote sound nutritional decision-making and appropriate levels of physical activity for all patients regardless of health status (27) | Attitude/Value | 1 |
|--|--|---------------------------------------------------------------------------------------------------------------------------------------------------------------------|----------------|---|

<sup>a</sup>Number of articles which include this competency

For peer review only

### Level of medical education:

All 11 articles specified the level of medical education where there would be an expectation to teach and achieve the nutrition competencies. Five articles included nutrition competencies for undergraduate and graduate (entry-level) medical education. Three of the 11 articles stipulated use by primary care providers and one paper included competencies for family practice residents. The remaining two articles merely specified use by “practicing physicians”.

### Summary of concepts

A summary competency framework adapted from Hughes et al. (2012) (12) and informed by the Dreyfus model of skill acquisition, the framework for clinical competency assessment outlined in Miller (1990) and the Knowledge to Action Cycle as described by Graham and colleagues (2006) (12, 19, 20, 40, 41) is presented based on the competencies in the literature (Figure 2). This provides a preliminary model for a nutrition competency framework for medicine, which can be further investigated in subsequent research. In this framework, categories of competency units are delineated into four different tiers to represent hierarchies of competency acquisition and assessment. At the base of the matrix are enabling and critical competencies (know and know how) which underpin higher level nutrition practice behaviours. At a foundational level, the Dunning-Kruger Effect indicates that individuals may be ‘unconsciously unskilled’ (42). The proposed framework also includes common, cross-cutting attributes identified in this review. Cross-cutting competencies delineate the professionalism required for effective, collaborative and safe practice and improve the transferability of the competency framework across health disciplines (12). Top-level practice competencies are defined by Hughes et al. (2012) as “higher order composite behaviours” which are required to “perform complex practice behaviours” which underpin core functions of the profession (12). Practice competencies involve behavioural performance (showing how and doing) and it is hoped the inclusion of these competencies bridges the gap between cognitive competencies and translation in practice (12).

1  
2  
3  
4  
5  
6  
7  
8  
9  
10  
11  
12  
13  
14  
15  
16  
17  
18  
19  
20  
21  
22  
23  
24  
25  
26  
27  
28  
29  
30  
31  
32  
33  
34  
35  
36  
37  
38  
39  
40  
41  
42  
43  
44  
45  
46

**Figure 2. Proposed conceptual nutrition competency framework for medicine**

For peer review only

## DISCUSSION

There is currently no consensus on nutrition competencies relevant for medical education. This review provides a critical synthesis of published nutrition competencies for medical education and practice internationally. This review identified five common themes across nutrition competencies which add to existing literature related to medical nutrition education. Twenty-five unique nutrition competencies for medical education were identified from 11 articles.

The five common themes across nutrition competencies for medicine, were clinical practice, health promotion and disease prevention, communication, working as a team and professional practice. The latter three, while referring to nutrition, highlighting generic skills that are required to be applied across all aspects of medical care. This is congruent with core competencies and individual roles in existing medical frameworks, such as the CanMEDS Physician Competency Framework, the Accreditation Council for Graduate Medical Education (ACGME) core competencies, the General Medical Council (GMC) Outcomes for graduates, the Australian Medical Council Limited (AMC) Graduate Outcome Statements and the Royal Australasian College of Physicians (RACP) Professional Practice Framework (32, 43-46). For example, the CanMEDS Physician Competency Framework, one of the most globally recognized health care profession competency frameworks articulates a number of intrinsic roles which reflect key themes identified in this review, such as the Communicator, Collaborator and Health Advocate.

Generic themes such as those identified in this review can provide leverage in educational reform, by aligning incentives to facilitate synergy across health care professions (47). For example, a multidisciplinary team (MDT – identified as “working as a team” in this review) approach to nutrition care has been shown to provide high quality, cost-effective nutrition outcomes (48, 49). However, there is a disconnect between the university education environment, which is generally not interdisciplinary, and the practice environment, which increasingly requires collaborative skills (47). Furthermore, communication and collaboration are key aspects of the iterative process of knowledge translation, including the ability to exchange information to overcome barriers to implementation. Communication and collaboration (teamwork) were also common themes identified by this review. Optimized knowledge translation has been shown to improve the quality of evidence-based nutrition care and strengthen the health care system, as summarised by the Knowledge to Action Cycle (41).

1  
2  
3 Not only does this cross-over between medical and nutrition competencies highlight the lateral  
4 nature of nutrition as a cognate scientific discipline, it provides merit to opportunity for the  
5 vertical integration of nutrition competencies into existing medical education. Rather than an  
6 isolated concept with a distinct set of competencies, existing medical spiral curricula could be  
7 enhanced by applying existing medical competencies to a nutrition context. Deen (2006)  
8 illustrated this by successfully mapping the Curriculum Committee of the National Academic  
9 Award (NAA) learning objectives to the ACGME competencies for competency-based  
10 resident evaluation (50). This reiterates the relevance of nutrition as a core facet of clinical  
11 practice without necessarily adding time to curricula. Namely, vertical integration of nutrition  
12 competencies into medical education is particularly relevant in a crowded curriculum, and is a  
13 key element of a successful integrated medical nutrition curriculum, shown to improve medical  
14 students' perceptions of nutrition as part of total patient care (51, 52).

15  
16  
17  
18  
19  
20  
21  
22  
23  
24  
25  
26 The majority of the medical nutrition competencies identified in this review were knowledge-  
27 based, while less than 30% of nutrition competencies were skill-based and only four  
28 competencies were attitude-based (Table 3). While knowledge-based (enabling) competencies  
29 are essential to interpret new concepts in nutrition and underpin higher order (practice)  
30 competencies, skill-based competencies are relevant to clinical practice, which requires the  
31 complex and judicious application of knowledge, technical skills, clinical reasoning, values and  
32 reflection under varied circumstances (24). This is in line with the experience of medical  
33 graduates and practising physicians, who do not feel comfortable or adequately prepared to  
34 provide nutrition counselling to their patients (7, 9, 53, 54). In order to overcome these barriers,  
35 Adams et al., (2010) and Lindsley et al., (2017) emphasise the need for "skill-centred nutrition  
36 training" (55). A realist synthesis of educational interventions to improve nutrition care  
37 competencies and delivery by doctors and other healthcare professionals, reports that  
38 educational interventions which led to improvements in the delivery of nutrition care focused  
39 on skills and attitudes rather than just knowledge (56). Skill-based nutrition training has been  
40 shown to improve medical students' nutrition knowledge and confidence in lifestyle  
41 counselling (57).

42  
43  
44  
45  
46  
47  
48  
49  
50  
51  
52  
53  
54  
55 Earlier research highlights the effectiveness of the Objective Structured Clinical Exam (OSCE)  
56 in evaluating the ability to synthesise and translate knowledge to clinical practice (52). Miller  
57 (1990) also emphasises the role of skill-based assessment methods such as the OSCE in the  
58 appraisal of technical and clinical competence. Problem-based learning tutorials, culinary skills  
59  
60

1  
2  
3 training and clinical case presentations have also been shown to promote active learning and  
4 lead to significant changes in participants' knowledge, personal health habits, confidence to  
5 provide dietary counselling and ability to nutritionally manage malnutrition (56). A  
6 combination of innovative learning strategies is required to support the development of clinical  
7 competence. Educational strategies and assessment methods which improve nutrition care  
8 competencies, such as problem-based learning and the OSCE, are already widely used methods  
9 in medical education (58). Therefore, the application of existing learning to a nutrition context,  
10 such as a nutrition OSCE, may lead to improvements in competency to provide nutrition care  
11 in future practice. The nutrition competencies identified in this review provide a potential  
12 benchmark for the nutrition knowledge, skills and attitudes to be included in curricula (Table  
13 3).

14  
15  
16  
17  
18  
19  
20  
21  
22  
23  
24 While vertical integration is not a new recommendation (59), there is little existing guidance  
25 on how to do this. Furthermore, while competency frameworks provide an architectural  
26 blueprint for constructing educational programmes, the centrality of valid assessment methods  
27 to support the life-long journey of competency development cannot be overlooked (11).  
28 Increasing the weighting of a topic in assessment has been shown to enhance medical students'  
29 reported motivation to learn about the topic (60). Furthermore, regular and repeated assessment  
30 can improve knowledge retention in medical students (61, 62). This is particularly important  
31 given that despite initial high interest in nutrition, interest in and perception of the importance  
32 of nutrition may decline during time in medical school (63).

## 33 34 35 36 37 38 39 40 41 **CONCLUSION**

42  
43  
44 This review identified five common, cross-cutting themes across nutrition competencies for  
45 medicine: 1) clinical practice, 2) health promotion and disease prevention, 3) communication,  
46 4) working as a team and 5) professional practice. This review also identified twenty-five  
47 nutrition competencies for medicine, the majority of which were knowledge-based. The most  
48 common nutrition competencies were related to nutrition assessment, dietary interventions for  
49 the prevention and treatment of disease, the role of nutrition in health promotion and disease  
50 prevention and knowledge of the social and cultural importance of food. This review  
51 recommends vertical integration of nutrition competencies into existing medical education  
52 based on key, cross-cutting themes, and increased opportunities to engage in relevant, skill-  
53 based nutrition training.  
54  
55  
56  
57  
58  
59  
60



1  
2  
3 **Acknowledgements:** We would like to thank Isla Kuhn, Medical Librarian at the University  
4 of Cambridge for her invaluable input to the search strategy.  
5  
6  
7

8 **Contributors:** BL, EB, KM and SR contributed to the design of the review. BL did the  
9 literature search, performed data analysis and drafted the manuscript. EB contributed to data  
10 extraction. All authors contributed to revision of the manuscript and approval of the final  
11 manuscript. The corresponding author attests that all listed authors meet authorship criteria and  
12 that no others meeting the criteria have been omitted. Patients and/or the public were not  
13 involved in this study.  
14  
15  
16  
17  
18  
19

20 **Funding:** This research received no specific grant from any funding agency in the public,  
21 commercial or not-for-profit sectors.  
22  
23  
24

25 **Competing interests:** None declared.  
26  
27  
28

29 **Patient consent for publication:** Not required  
30  
31  
32  
33  
34  
35  
36  
37  
38  
39  
40  
41  
42  
43  
44  
45  
46  
47  
48  
49  
50  
51  
52  
53  
54  
55  
56  
57  
58  
59  
60

## REFERENCES

1. World Directory of Medical Schools: World Federation for Medical Education & the Foundation for Advancement of International Medical Education and Research; 2015 [Available from: <https://archive.is/uFsGe>].
2. GBD 2017 Diet Collaborators. Health effects of dietary risks in 195 countries, 1990-2017: a systematic analysis for the Global Burden of Disease Study 2017. *Lancet* 2019;11(393):1958-72.
3. Gwynn J, Sin K, Searle T, *et al*. Effect of nutrition interventions on diet-related and health outcomes of Aboriginal and Torres Strait Islander Australians: A systematic review. *BMJ Open* 2019;9(4).
4. Kris-Etherton PM, Akabas SR, Douglas P, *et al*. Nutrition competencies in health professionals' education and training: a new paradigm. *Adv Nutr* 2015;6(1):83-7.
5. Kominiarek M, Rajan P. Nutrition recommendations in pregnancy and lactation. *Med Clin* 2016;100(6):1199-215.
6. Patient and Affordable Care Act, HR 3590, 111th Congress, Sec. 1001 2010 [Available from: <http://www.gpo.gov/fdsys/pkg/BILLS-111hr3590enr/pdf/BILLS-111hr3590enr.pdf>].
7. Ball LE, Hughes RM, Leveritt MD. Nutrition in general practice: role and workforce preparation expectations of medical educators. *Aust J Prim Health* 2010;16(4):304-10.
8. General Practice: Health of the Nation 2018. East Melbourne, Victoria: The Royal Australian College of General Practitioners; 2018.
9. Crowley J, Ball L, Hiddink G. Nutrition in medical education: a systematic review. *Lancet Planet Health* 2019;3(9):E379-E89.
10. Hughes R. Competencies for effective public health nutrition practice: a developing consensus. *Public Health Nutr* 2004;7(5):683-91.
11. Gruppen L, Mangrulkar R, Kolars J. The promise of competency-based education in the health professions for improving global health. *Hum Resour Health* 2012;10(43).
12. Hughes R, Shrimpton R, Recine E, *et al*. Empowering our profession [Commentary] *World Nutr J* 2012;3(2):33-54.
13. United Nations Decade of Action on Nutrition 2016-2025: United Nations; 2020 [Available from: <https://www.un.org/nutrition/about>].
14. Sierpina VS, Welch K, Devries S, *et al*. What Competencies Should Medical Students Attain in Nutritional Medicine? *Explore (NY)* 2016;12(2):146-7.
15. Torraco RJ. Writing integrative literature reviews: Guidelines and examples. *Hum Resour Manag Rev* 2005;4:356-67.
16. Whittemore R, Knafl K. The integrative review: Updated methodology. *J Adv Nurs* 2005;52(2):546-53.
17. Halcomb E, Stephens M, Bryce J, *et al*. Nursing competency standards in primary health care: an integrative review. *J Clin Nurs* 2016;25:1193-205.
18. Whittemore R, Knafl, K. The integrative review: Updated methodology. *Journal of advanced nursing* 2005;52(5):546-53.
19. Miller GE. The assessment of clinical skills/competence/performance. *Acad Med* 1990;65(9):s63-s7.
20. Benner P. Use of the Dreyfus model of skill acquisition to describe and interpret skill acquisition and clinical judgement in nursing practice and education. *Bull Sci Technol Soc* 2005;24:188-99.

21. Graham I, Tetroe J, Pearson A. Turning Knowledge into Action: Practical Guidance on How to Do Integrated Knowledge Translation Research: Lippincott Williams & Wilkins; 2014.
22. Verma S, Paterson M, Medves J. Core competencies for health care professionals: What medicine, nursing, occupational therapy, and physiotherapy share. *J Allied Health* 2006;35:109-15.
23. Epstein RM, Hundert EM. Defining and assessing professional competence. *JAMA* 2002;287(2):226-35.
24. Benner P. From novice to expert. *Am J Nurs* 1982;402-7.
25. Frankson R, Hueston W, Christian K, et al. One Health Core Competency Domains. *Front Public Health* 2016;4.
26. Cuerda C, Muscaritoli M, Donini LM, et al. Nutrition education in medical schools (NEMS). An ESPEN position paper. *Clin Nutr* 2019;38(3):969-74.
27. Lindsley JE, Abali EE, Bikman BT, et al. What Nutrition-Related Knowledge, Skills, and Attitudes Should Medical Students Develop? *Med Sci Educ* 2017;27(4):579-83.
28. Akner G, Andersson H, Forsum E, et al. A national document on clinical nutrition. Developmental work for improvement of medical education. *Lakartidningen* 1997;94(18):1731-9.
29. Extended Nutrition Competency Framework (NCF). Deakin University Strategic Teaching and Learning Grant Steering Committee; 2016.
30. ICGN Undergraduate Curriculum in Nutrition. ICGN Undergraduate Nutrition Education Implementation Group; 2013.
31. Recommended core educational guidelines on nutrition for family practice residents. *Am Fam Physician* 1989;40(1):265-6.
32. Accreditation Standards for Primary Medical Education Providers and their Program of Study and Graduate Outcome Statements. Australian Medical Council Limited; 2012.
33. General Medical Council: General Medical Council; 2020 [Available from: <https://www.gmc-uk.org/>].
34. Medical Schools Council: Home: Medical Schools Council (MSC); 2020 [Available from: <https://www.medschools.ac.uk/>].
35. Maillet JO, Young EA. ADA reports. Position of The American Dietetic Association: nutrition education for health care professionals. *J Am Diet Assoc* 1998;98(3):343-6.
36. Nutrition core competencies for health science cadres and undergraduate nutritionists in Ethiopia. Jhpiego & Save the Children; 2012.
37. Young EA, Weser E, McBride HM, et al. Development of core competencies in clinical nutrition. *Am J Clin Nutr* 1983;38(5):800-10.
38. Deen D, Jr., Karp R, Lowell B. A new approach to nutrition education for primary care physicians in the United States. *J Gen Intern Med* 1994;9(7):407-8.
39. Asp NG, Akner G, Forsum E, et al. Nutrition in Swedish medical education. *Nord Med* 1995;110(11):292-3.
40. Dreyfus S, Dreyfus, H. A five-stage model of the mental activities involved in directed skill acquisition and clinical judgement in nursing practice and education: University of California: Berkeley; 1980.
41. Laur C, Keller, H. Implementing best practice in hospital multidisciplinary nutritional care: an example of using the knowledge-to-action process for a research program. *Journal of Multidisciplinary Healthcare* 2015;8:463-72.
42. Dunning D. Chapter Five - The Dunning-Kruger Effect: On Being Ignorant of One's Own Ignorance. *Adv Exp Soc Psychol* 2011;44:247-96.

- 1
- 2
- 3
- 4 43. Frank JR, Snell L, Sherbino J. CanMEDS 2015 Physician Competency Framework. Ottawa: Royal College of Physicians and Surgeons of Canada; 2015.
- 5
- 6 44. ACGME Outcome Project. Accreditation Council for Graduate Medical Education (ACGME); 2007.
- 7
- 8 45. Professional Practice Framework: Royal Australasian College of Physicians (RACP); 2020 [Available from: [https://www.racp.edu.au/trainees/curricula/professional-practice-](https://www.racp.edu.au/trainees/curricula/professional-practice-framework)
- 9 [framework](https://www.racp.edu.au/trainees/curricula/professional-practice-framework)].
- 10
- 11 46. Outcomes for graduates 2018. General Medical Council (GMC); 2018.
- 12
- 13 47. Greiner A, Knebel E. Health Professions Education: A bridge to quality. Institute of Medicine (IOM); 2003.
- 14
- 15 48. Butcher M. P1.29: The impact of a nutrition multidisciplinary team. *Transplantation* 2019;103(7S2):S73-S4.
- 16
- 17 49. Rasmussen N, Belqaid K, Lugnet K, *et al.* Effectiveness of multidisciplinary nutritional support in older hospitalised patients: A systematic review and meta-analyses. *Clin Nutr ESPEN* 2018;27:P44-52.
- 18
- 19 50. Deen D. How can nutrition education contribute to competency-based resident evaluation? *Am J Clin Nutr* 2006:976S-80S.
- 20
- 21 51. Krebs N, Primak L. Comprehensive integration of nutrition into medical training. *Am J Clin Nutr* 2006:945S-50S.
- 22
- 23 52. Taren D, Thomson C, Koff N, *et al.* Effect of an integrated nutrition curriculum on medical education, student clinical performance, and student perception of medical-nutrition training. *Am J Clin Nutr* 2001;73(6):1107-12.
- 24
- 25 53. Levine B, Wigren M, Chapman D, *et al.* A national survey of attitudes and practices of primary-care physicians relating to nutrition: strategies for enhancing the use of clinical nutrition in medical practice. *Am J Clin Nutr* 1993;57:115-9.
- 26
- 27 54. Soltesz K, Price J, Johnson L, *et al.* Family physicians' views of the preventive services task force recommendations regarding nutritional counseling. *Arch Fam Med* 1995;4:589-93.
- 28
- 29 55. Adams KM, Kohlmeier M, Powell M, *et al.* Nutrition in medicine: nutrition education for medical students and residents. *Nutr Clin Pract* 2010;25(5):471-80.
- 30
- 31 56. Mogre V, Scherpbier, A.J.J.A., Stevens, F., Aryee, P., Cherry, M.G. & Dornan, T. Realist synthesis of educational interventions to improve nutrition care competencies and delivery by doctors and other healthcare professionals. *BMJ Open* 2016;6:e010084.
- 32
- 33 57. Pang B, Memel Z, Diamant C, *et al.* Culinary medicine and community partnership: hands-on culinary skills training to empower medical students to provide patient-centered nutrition education. *Med Educ Online* 2019;24(1).
- 34
- 35 58. Witheridge A, Ferns, G. & Scott-Smith, W. Revisiting Miller's pyramid in medical education: the gap between traditional assessment and diagnostic reasoning. *Int J Med Educ* 2019;10:191-2.
- 36
- 37 59. Al-Nimr RI, Rao S, Ogrinc G, *et al.* A 4-Year Integrated Nutrition Curriculum for Medical Student Education. *Med Sci Educ* 2018;29(1):23-8.
- 38
- 39 60. Wormald BW, Schoeman S, Somasunderam A, *et al.* Assessment Drives Learning: An Unavoidable Truth? *Anat Sci Educ* 2009;2(5):199-204.
- 40
- 41 61. Larsen D, Butler A, Roediger H. Test-enhanced learning in medical education. *Med Educ* 2008;42:959-66.
- 42
- 43 62. Kromann C, Jensen M, Ringsted C. The effect of testing on skills learning. *Med Educ* 2009;43:21-7.
- 44
- 45
- 46
- 47
- 48
- 49
- 50
- 51
- 52
- 53
- 54
- 55
- 56
- 57
- 58
- 59
- 60

1  
2  
3 63. Morgan SL, Weinsier RL, Boker JR, *et al*. A comparison of nutrition knowledge of  
4 freshmen and senior medical students: a collaborative study of southeastern medical  
5 schools. *J Am Coll Nutr* 1988;7(3):193-7.  
6  
7  
8  
9  
10  
11  
12  
13  
14  
15  
16  
17  
18  
19  
20  
21  
22  
23  
24  
25  
26  
27  
28  
29  
30  
31  
32  
33  
34  
35  
36  
37  
38  
39  
40  
41  
42  
43  
44  
45  
46  
47  
48  
49  
50  
51  
52  
53  
54  
55  
56  
57  
58  
59  
60

For peer review only

## Appendix 1 – Scopus search strategy (adapted for use on other databases)

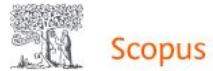

Search Sources Lists SciVal ↗

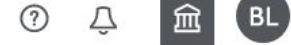

# 2,416 document results

```
((TITLE-ABS-KEY (doctor*)) OR (TITLE-ABS-KEY((medic* OR doctor* OR clinical*) W/2 student*)) OR (TITLE-ABS-KEY ("medical student")) OR (TITLE-ABS-KEY ("general practitioner*" OR gp* OR "family doctor*" OR "family physician*")) OR (TITLE-ABS-KEY (medical W/3 (specialist* OR intern* OR resident*))) OR (TITLE-ABS-KEY ("specialist registrar*")) OR (TITLE-ABS-KEY ("clinical specialist*")) OR (TITLE-ABS-KEY ("medical education")) OR (TITLE-ABS-KEY ("undergraduate medical education")) OR (TITLE-ABS-KEY ("postgraduate medical education"))) AND ((TITLE-ABS-KEY (nutrition*)) OR (TITLE-ABS-KEY (diet*)) OR (TITLE-ABS-KEY (lifestyle*)) OR (TITLE-ABS-KEY ("life style"))) AND ((TITLE-ABS-KEY (competen*)) OR (TITLE-ABS-KEY ("clinical competen*")) OR (TITLE-ABS-KEY ("competency-based education")) OR (TITLE-ABS-KEY (curricul*)) OR (TITLE-ABS-KEY ("competency framework*")) OR (TITLE-ABS-KEY ("competency standard*"))))
```

[View less ^](#)

review only

**Figure 1. PRISMA flow diagram for identification of articles related to nutrition competencies for medicine.**

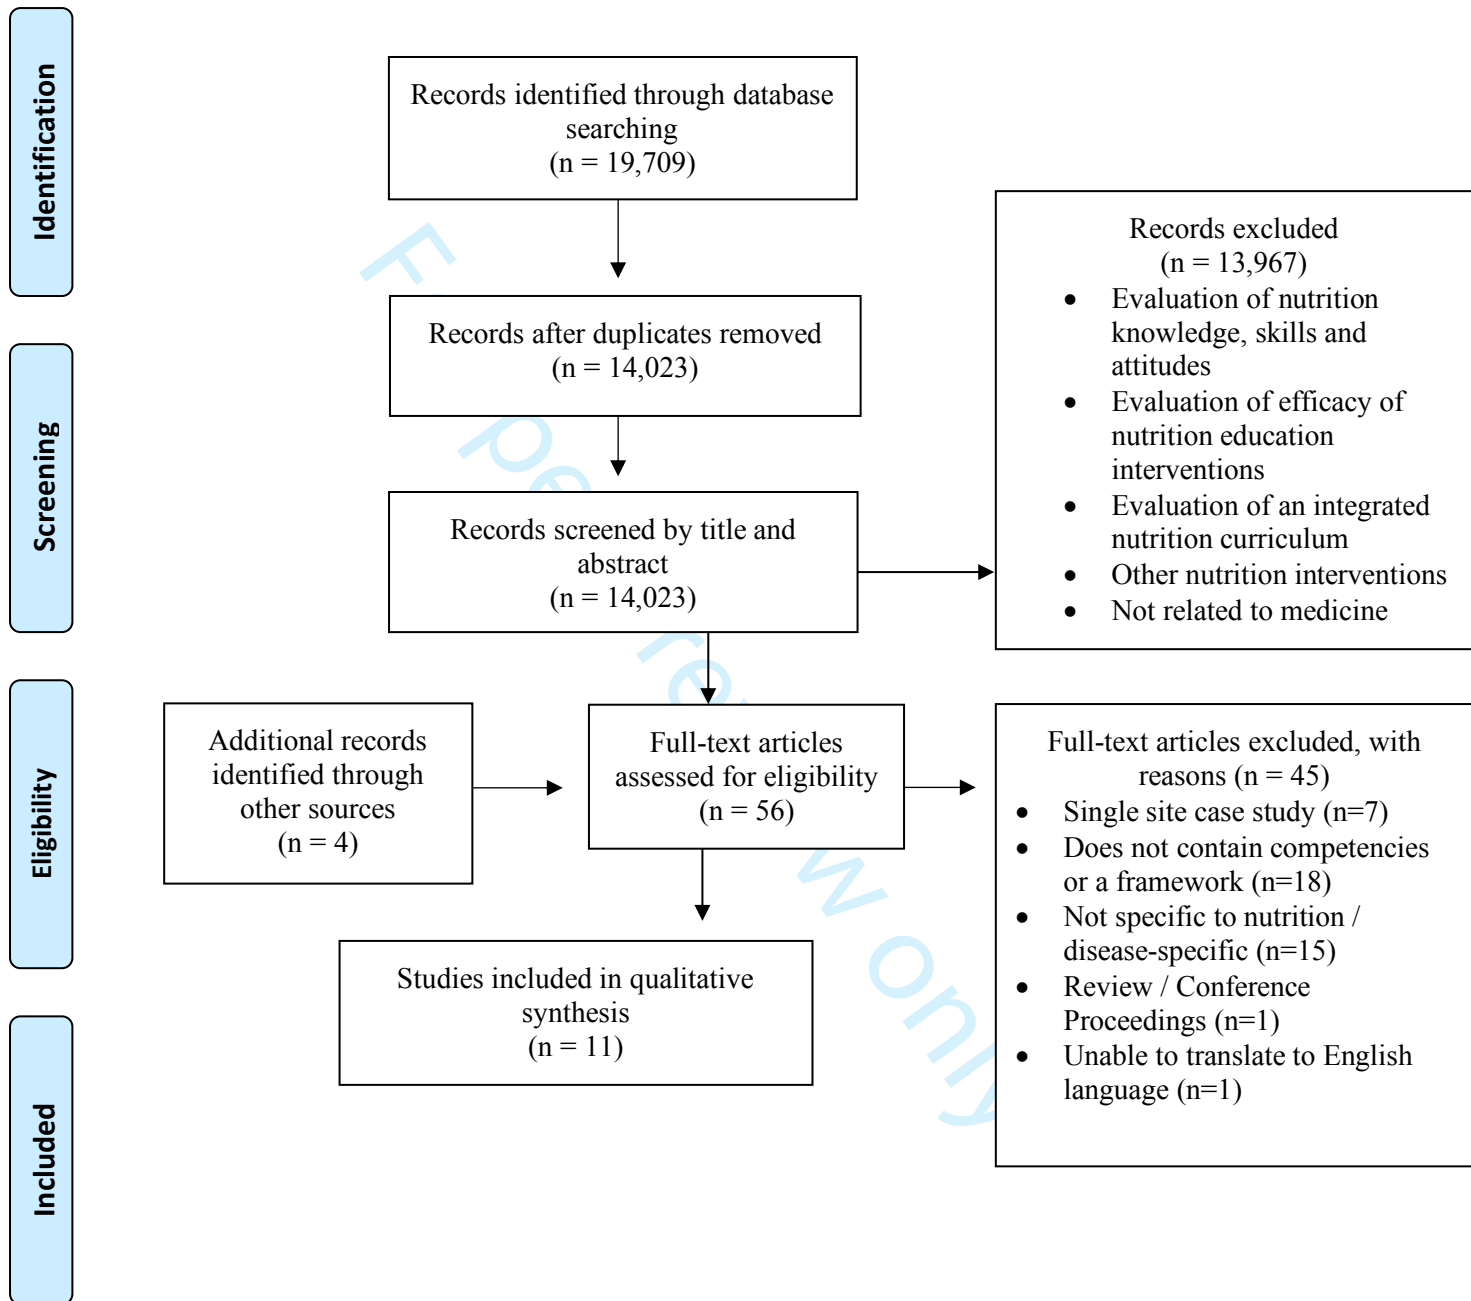

1  
2 **Figure 2. Proposed conceptual nutrition competency framework for medicine**

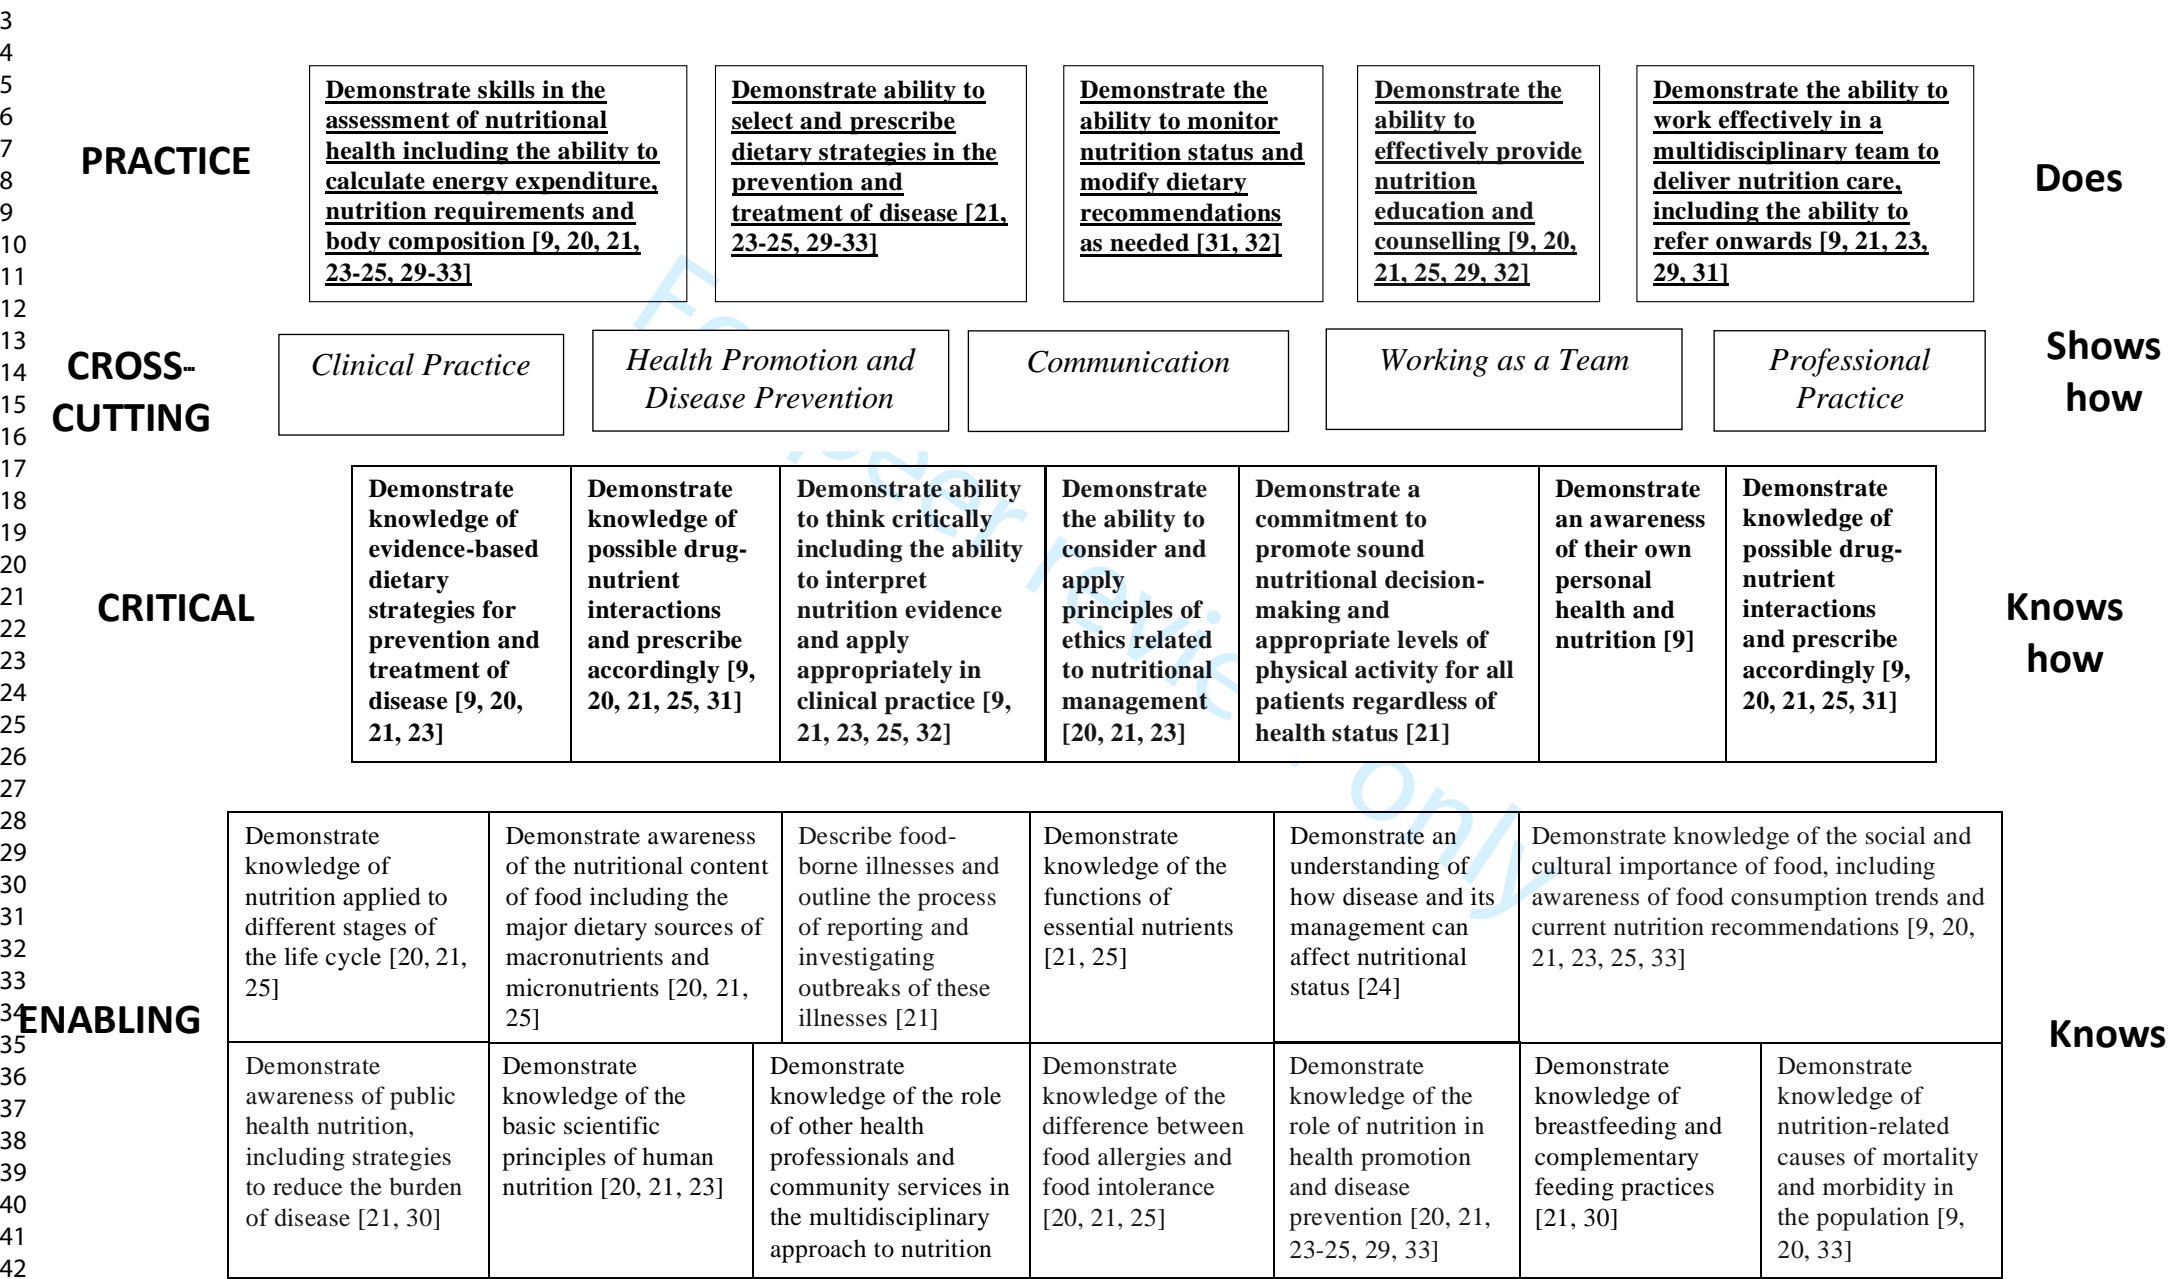



# BMJ Open

## Nutrition Competencies for Medicine: An Integrative Review and Critical Synthesis

|                                 |                                                                                                                                                                                                                                                                                                                                                                                                                                                                                               |
|---------------------------------|-----------------------------------------------------------------------------------------------------------------------------------------------------------------------------------------------------------------------------------------------------------------------------------------------------------------------------------------------------------------------------------------------------------------------------------------------------------------------------------------------|
| Journal:                        | <i>BMJ Open</i>                                                                                                                                                                                                                                                                                                                                                                                                                                                                               |
| Manuscript ID                   | bmjopen-2020-043066.R1                                                                                                                                                                                                                                                                                                                                                                                                                                                                        |
| Article Type:                   | Original research                                                                                                                                                                                                                                                                                                                                                                                                                                                                             |
| Date Submitted by the Author:   | 18-Dec-2020                                                                                                                                                                                                                                                                                                                                                                                                                                                                                   |
| Complete List of Authors:       | Lepre, Breanna; University of Wollongong, School of Medicine; NNEdPro Global Centre for Nutrition and Health, Mansfield, Kylie; University of Wollongong, School of Medicine, University of Wollongong, and Illawarra Health & Medical Research Institute Ray, Sumantra; NNEdPro Global Centre for Nutrition and Health, St. John's Innovation Centre Beck, Eleanor; University of Wollongong, School of Medicine, University of Wollongong and Illawarra Health & Medical Research Institute |
| <b>Primary Subject Heading</b>: | Medical education and training                                                                                                                                                                                                                                                                                                                                                                                                                                                                |
| Secondary Subject Heading:      | Nutrition and metabolism                                                                                                                                                                                                                                                                                                                                                                                                                                                                      |
| Keywords:                       | MEDICAL EDUCATION & TRAINING, NUTRITION & DIETETICS, EDUCATION & TRAINING (see Medical Education & Training)                                                                                                                                                                                                                                                                                                                                                                                  |
|                                 |                                                                                                                                                                                                                                                                                                                                                                                                                                                                                               |

SCHOLARONE™  
Manuscripts

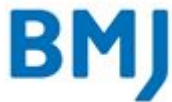

I, the Submitting Author has the right to grant and does grant on behalf of all authors of the Work (as defined in the below author licence), an exclusive licence and/or a non-exclusive licence for contributions from authors who are: i) UK Crown employees; ii) where BMJ has agreed a CC-BY licence shall apply, and/or iii) in accordance with the terms applicable for US Federal Government officers or employees acting as part of their official duties; on a worldwide, perpetual, irrevocable, royalty-free basis to BMJ Publishing Group Ltd ("BMJ") its licensees and where the relevant Journal is co-owned by BMJ to the co-owners of the Journal, to publish the Work in this journal and any other BMJ products and to exploit all rights, as set out in our [licence](#).

The Submitting Author accepts and understands that any supply made under these terms is made by BMJ to the Submitting Author unless you are acting as an employee on behalf of your employer or a postgraduate student of an affiliated institution which is paying any applicable article publishing charge ("APC") for Open Access articles. Where the Submitting Author wishes to make the Work available on an Open Access basis (and intends to pay the relevant APC), the terms of reuse of such Open Access shall be governed by a Creative Commons licence – details of these licences and which [Creative Commons](#) licence will apply to this Work are set out in our licence referred to above.

Other than as permitted in any relevant BMJ Author's Self Archiving Policies, I confirm this Work has not been accepted for publication elsewhere, is not being considered for publication elsewhere and does not duplicate material already published. I confirm all authors consent to publication of this Work and authorise the granting of this licence.

1  
2  
3  
4  
5  
6  
7  
8  
9  
10  
11  
12  
13  
14  
15  
16  
17  
18  
19  
20  
21  
22  
23  
24  
25  
26  
27  
28  
29  
30  
31  
32  
33  
34  
35  
36  
37  
38  
39  
40  
41  
42  
43  
44  
45  
46  
47  
48  
49  
50  
51  
52  
53  
54  
55  
56  
57  
58  
59  
60

## **Nutrition Competencies for Medicine: An Integrative Review and Critical Synthesis**

For peer review only

**Corresponding Author:****Breanna Lepre**Email: [bl778@uowmail.edu.au](mailto:bl778@uowmail.edu.au)

School of Medicine, University of Wollongong, and Illawarra Health & Medical  
Research Institute, Northfields Ave, Wollongong NSW 2522, Australia

NNEdPro Global Centre for Nutrition and Health, St. John's Innovation Centre, Cowley  
Road, Cambridge CB4 0WS, UK

**Co-Author(s):****1. Kylie J Mansfield**

School of Medicine, University of Wollongong, Wollongong NSW 2522, Australia

**2. Shumone (Sumantra) Ray**

NNEdPro Global Centre for Nutrition and Health, St. John's Innovation Centre, Cowley  
Road, Cambridge, UK

**3. Eleanor J Beck**

School of Medicine, University of Wollongong and Illawarra Health & Medical Research  
Institute, Wollongong NSW 2522, Australia

**Word Count (excluding title page, abstract, references, figures and tables): 4000**

## 1 ABSTRACT

2  
3  
4  
5  
6  
7  
8  
9  
10  
11  
12  
13  
14  
15  
16  
17  
18  
19  
20  
21  
22  
23  
24  
25  
26  
27  
28  
29  
30  
31  
32  
33  
34  
35  
36  
37  
38  
39  
40  
41  
42  
43  
44  
45  
46  
47  
48  
49  
50  
51  
52  
53  
54  
55  
56  
57  
58  
59  
60

1 **Objective:** Globally, 11 million deaths are attributable to suboptimal diet annually, and  
2 nutrition care has been shown to improve health outcomes. While medically trained clinicians  
3 are well-placed to provide nutrition care, medical education remains insufficient to support  
4 clinicians to deliver nutrition advice as part of routine clinical practice. Competency standards  
5 provide a framework for workforce development and a vehicle for aligning health priorities  
6 with the values of a profession. Albeit, there remains an urgent need to establish consensus on  
7 nutrition competencies for medicine. The aim of this review is to provide a critical synthesis  
8 of published nutrition competencies for medicine internationally.

11  
12 **Design:** Integrative review.

13  
14 **Data sources:** CINAHL, Medline, Embase, Scopus, Web of Science and Global Health were  
15 searched through April 2020.

16  
17 **Eligibility criteria:** We included published nutrition competency frameworks. This search was  
18 complemented by handsearching reference lists of literature deemed relevant.

19  
20 **Data extraction and synthesis:** Data were extracted into summary tables and this matrix was  
21 then used to identify common themes and to compare and analyse the literature. Miller's  
22 pyramid, the Knowledge to Action cycle and the Dreyfus model of skill acquisition were also  
23 used to consider the results of this review.

24  
25 **Results:** Using a pre-determined search strategy, 11 articles were identified. Five common  
26 themes were identified and include 1) clinical practice, 2) health promotion and disease  
27 prevention, 3) communication, 4) working as a team and 5) professional practice. This review  
28 also identified twenty-five nutrition competencies for medicine, the majority of which were  
29 knowledge-based.

30  
31 **Conclusions:** This review recommends vertical integration of nutrition competencies into  
32 existing medical education based on key, cross-cutting themes, and increased opportunities to  
33 engage in relevant, skill-based nutrition training.

1  
2  
3 35 **Keywords:** Competency-based education, Medical education, Nutrition competencies,  
4  
5 36 Nutrition education  
6  
7 37  
8 38

9 39 **STRENGTHS AND LIMITATIONS OF THIS STUDY**  
10 40

- 11 41 • This review offers a critical and timely synthesis of medical nutrition competencies and  
12  
13 42 a conceptual nutrition competency framework.  
14  
15 43 • Themes such as communication and teamwork are not specific to nutrition and  
16  
17 44 highlight integration of topics across a curriculum.  
18  
19 45 • As an integrative review, this framework might be considered a candidate theory for  
20  
21 46 further review and development.  
22  
23 47 • It is recognized that the characteristics of included publications is skewed towards those  
24  
25 48 published in the USA and that there may be other frameworks internationally. However,  
26  
27 49 it is relevant to note that there are a greater number of medical education facilities in  
28  
29 50 the USA than other countries included such as Australia, New Zealand and Sweden.  
30  
31 51 • Research into competence and competency standards is dynamic and frameworks  
32  
33 52 included are from varied time periods. This may limit application of this work to  
34  
35 53 modern standards.  
36  
37 54  
38 55  
39 56  
40 57

## 58 INTRODUCTION

59  
60 Globally, 11 million deaths are attributable to suboptimal diet annually (1). Furthermore, in  
61 2014, more than 1.9 billion adults were overweight, while 462 million were underweight. This  
62 coexistence of undernutrition, along with overweight and obesity, or diet-related chronic  
63 diseases, is referred to as the double burden of malnutrition. This burden is universal and  
64 presents an imperative to improve the nutrition capacity of the health workforce (2). Nutrition  
65 is a powerful tool for the prevention and management of diet-related chronic diseases (1).  
66 Nutrition care refers to any intervention performed by a health professional to improve the  
67 nutrition behaviour and subsequent health status of an individual or community and has been  
68 shown to improve diet-related and health outcomes, often with reduced risk, side effects and  
69 costs when compared with pharmacological interventions (3, 4). For example, when doctors  
70 provide nutrition advice as part of prenatal care, their patients have fewer complications  
71 associated with pregnancy and give birth to healthier children (5). In fact, a recent systematic  
72 analysis reports that improvement of diet could potentially prevent one in every five deaths  
73 globally (1). Furthermore, public health legislation such as the Patient Protection and  
74 Affordable Care Act (Sections 4001(d)(3), 4004(c)(d), 4103(b) and 4206) recognise the  
75 increased need for preventive healthcare interventions, such as nutrition care and authorises  
76 investments in training health professionals (6). Other countries, such as Australia, have not  
77 updated their National Nutrition Policy in over 25 years, while the National Healthy Food and  
78 Drink Policy in New Zealand does not include any reference of training of health professionals  
79 (7, 8). The World Health Organization (WHO) reiterate the need for increased investments in  
80 nutrition for improved health and successful development; the objectives of Universal Health  
81 Coverage cannot be achieved until nutrition actions are integrated across the health care  
82 continuum (9). Therefore, it is essential that clinicians of all backgrounds are cognizant of the  
83 role of nutrition in health and are well-equipped to initiate and support nutrition care as part of  
84 routine clinical practice.

85  
86 Medically trained clinicians are well-placed to initiate and support patient nutrition care (10),  
87 in part due to their regular contact with the individuals for whom they provide care. For  
88 example, 88% of individuals are likely to see a general practitioner (primary care physician)  
89 annually (11). Furthermore, in a hospital setting, an estimated 13% to 69% of hospitalized  
90 individuals are malnourished on admission, and importantly, the prevalence is also high pre-  
91 discharge (12-15). Despite this, a recent systematic review indicates that medical education

1  
2  
3 92 remains insufficient to support clinicians to provide nutrition care as part of routine clinical  
4  
5 93 practice (16). There are a number of organizations calling for improved nutrition education for  
6  
7 94 physicians (17). Competency standards provide a framework for workforce development and  
8  
9 95 are essential for the delivery of safe, effective and patient-centred care (18) and a vehicle for  
10  
11 96 aligning the health priorities of the country with the values of a profession (19). This is  
12  
13 97 particularly relevant, as there is an existing disconnect between medical education and the  
14  
15 98 exigent double burden of malnutrition (16). While there are many approaches to developing a  
16  
17 99 competency framework, authors argue that a preoccupation with discipline-specific tasks  
18  
19 100 overlooks the relevance of cross-cutting attributes such as critical thinking, communication and  
20  
21 101 collaboration which align outcomes across disciplines (18, 20). An integrated approach to  
22  
23 102 competency encompasses the ability to combine and apply practical and reflexive competence  
24  
25 103 in different contexts (20). The use of competency standards in improving medical nutrition  
26  
27 104 education has been previously established and has been shown to increase a clinician's ability  
28  
29 105 to integrate nutrition into patient care (4). Competency in nutrition care is important in the  
30  
31 106 delivery of safe, effective and co-ordinated care (21). However, there is a recognised need to  
32  
33 107 establish consensus on relevant nutrition competencies for medicine (16). The aim of this  
34  
35 108 review is to provide a critical synthesis of published nutrition competencies for medicine  
36  
37 109 internationally. As the UN *Decade of Action on Nutrition 2016-2025* is well underway, this is  
38  
39 110 a timely and important review (22).

## 111 112 **METHODS**

113  
114 This review was an integrative literature review, a “form of research that reviews, critiques and  
115  
116 synthesises representative literature on a topic in an integrated way such that new frameworks  
117  
118 and perspectives on the topic are generated” (23). This methodology is considered rigorous in  
119  
120 this context, and was selected as it allows for a combination of various study designs and data  
121  
122 sources to be included (24, 25). Data, namely, nutrition competencies, were extracted into  
123  
124 summary tables (24) and this matrix was then used to identify common themes and compare,  
125  
126 contrast and analyse the literature (26). Miller's pyramid, the Knowledge to Action cycle and  
127  
128 the Dreyfus model of skill acquisition were also used to consider the results of this review (27-  
129  
130 29). These frameworks acknowledge the complexity of clinical competence and the process of  
131  
132 skill acquisition including the application of knowledge in practice. Furthermore, Miller's  
133  
134 pyramid and the Dreyfus model of skill acquisition have been previously used as a theoretical  
135  
136 framework on which to underpin and improve educational practice in the field of medicine (30-



33). These frameworks were therefore utilised as a theoretical blueprint for the organisation of nutrition competencies identified in this review. For the purposes of this review, we initially defined key concepts based on published definitions and author experience (Table 1).

**Table 1. Definitions of key concepts used within this review**

| Concept                             | Definition                                                                                                                                                                                                                                                                                         |
|-------------------------------------|----------------------------------------------------------------------------------------------------------------------------------------------------------------------------------------------------------------------------------------------------------------------------------------------------|
| Competency (or competency standard) | A measure used to describe the idealized capacity of an individual to perform a role or set of tasks (34).                                                                                                                                                                                         |
| Competence                          | Competence can be described as the ability to perform a task with desirable outcomes under varied circumstances. This definition encompasses multiple components such as the habitual and judicious application of knowledge, technical skills, values, clinical reasoning and attitudes (35, 36). |
| Domains of competence               | Competency domains represent organised clusters of competencies which are intended to characterise a central aspect of professional practice in which a professional should be competent (37).                                                                                                     |
| Competency framework                | A competency framework represents a complete collection of competencies required for effective performance (18).                                                                                                                                                                                   |
| Curriculum framework                | A curriculum framework is an organised set of standards or learning objectives that define educational requirements                                                                                                                                                                                |

## Search methods

CINAHL, Medline, Embase, Scopus, Web of Science and Global Health were searched through April 2020 to identify published nutrition competency frameworks for medical education. The search strategy for each database is provided in Supplementary Materials. In brief, the key concepts were related to medically trained clinicians, nutrition and diet and competency. A research team comprised of all authors in this study, as well as a medical librarian, agreed upon terms with the aim of avoiding researcher bias when selecting articles. This search was complemented by handsearching reference lists of literature deemed relevant.

Inclusion criteria for this review were original research publications representing nutrition competencies for the continuum of medical education (pre- and post-registration). We included interdisciplinary nutrition competency frameworks if the framework stipulated use by the

1  
2  
3 145 medical profession. We excluded frameworks which included only limited reference to  
4  
5 146 nutrition. For example, if a framework was specific to a disease, condition, or specialty rather  
6  
7 147 than only nutrition, the paper was excluded (for example CVD-related frameworks which only  
8  
9 148 included a reference to possible nutrition therapy). We included only current versions of  
10  
11 149 frameworks and excluded editorials, reviews, conference proceedings, opinion papers and  
12  
13 150 interviews. Grey literature was also reviewed by searching the reference lists of literature  
14  
15 151 deemed relevant. The results of the search were not limited by time or language.  
152

### 17 153 **Search outcome**

18  
19 154  
20 155 All database searches were directly imported into the electronic reference management tool  
21  
22 156 Endnote<sup>®</sup> Version X9 (Clarivate Analytics, Philadelphia, USA) and grey literature searches  
23  
24 157 were manually entered by the primary author (BL). After the removal of duplicates using  
25  
26 158 EndNote and manually, one author (BL) independently screened titles and abstracts and  
27  
28 159 selected studies according to the pre-defined inclusion criteria. If the abstract was not  
29  
30 160 sufficient, full texts of remaining papers were screened independently to identify publications  
31  
32 161 for inclusion. Where it was not clear, the primary author engaged in consultative and iterative  
33  
34 162 discussion amongst authors to reach consensus. All authors reached consensus on the included  
35  
36 163 articles.  
37

### 38 165 **Data analysis**

39 166  
40  
41 167 Data extraction was completed independently by the primary researcher (BL). Information  
42  
43 168 relating to nutrition competencies was extracted from the retained articles. Information  
44  
45 169 discussing the nutrition-related knowledge, skills or attitudes which published authors believed  
46  
47 170 medical practitioners needed to obtain was categorised as a competency and recorded.  
48  
49 171 Similarly, competency domains or themes represent organised clusters of competencies which  
50  
51 172 are intended to characterise a central aspect of professional practice in which a professional  
52  
53 173 should be competent (37). Information related to competency domains was also included. Data  
54  
55 174 was extracted from each paper into a summary table and series of matrices. The following  
56  
57 175 information was extracted from full-text publications and presented systematically: citation  
58  
59 176 and country, organisation/group, name of the framework, nutrition domains (if stated),  
60  
177 nutrition competencies, learning objectives (if stated) and the level of medical education that

1  
2  
3 178 the framework is intended for (e.g. residency). Findings were read, re-read and articles  
4 compared and contrasted to identify patterns and relationships.  
5 179  
6  
7 180

### 8 181 **Quality appraisal**

10  
11 182 To determine quality and risk of bias for review, the full text of each article was assessed  
12 independently for quality (including risk of bias) by the primary researcher (BL). Given the  
13 183 variation in research methodologies, the Critical Appraisal Skills Programme (CASP) tool was  
14 184 modified for use, as adapted by Halcomb et al. (2016) (CASP, 2019; Halcomb et al., 2016).  
15 185  
16  
17  
18

### 19 186 **Patient and Public Involvement**

20  
21  
22 187 There is no patient and public involved in the study.  
23  
24

## 25 188 **RESULTS**

26 189

### 28 190 **Search results**

29  
30 191

31 192 The total yield from all databases was 19,709 results. This was reduced to 14,023 results after  
32 the removal of duplicates. Using the exclusion criteria against title and abstract, a total of 56  
33 193 full-text publications were assessed for eligibility, including four publications identified  
34 194 through hand searching of reference lists (Figure 1). It is of interest to note that a considerable  
35 195 number of results were related to the impact of a nutrition course or competency framework on  
36 196 nutrition knowledge, skills and attitudes and therefore not eligible for inclusion. Following full-  
37 197 text review, 11 articles were included in the review. Reasons for exclusion included papers  
38 198 which did not include competencies or a framework (n=18) and competencies that are not  
39 199 specific to nutrition or competencies for a specific aspect of nutrition or health care (for  
40 200 example cardiovascular disease nutrition competencies) (n=15). A list of excluded studies  
41 201 along with reasons for exclusion is provided in Online Supplementary Materials.  
42  
43  
44  
45  
46  
47  
48  
49 202  
50  
51  
52  
53  
54  
55  
56  
57  
58  
59  
60

1  
2  
3  
4  
5  
6  
7  
8  
9  
10  
11  
12  
13  
14  
15  
16  
17  
18  
19  
20  
21  
22  
23  
24  
25  
26  
27  
28  
29  
30  
31  
32  
33  
34  
35  
36  
37  
38  
39  
40  
41  
42  
43  
44  
45  
46  
47  
48  
49  
50  
51  
52  
53  
54  
55  
56  
57  
58  
59  
60

203 **Figure 1. PRISMA flow diagram for identification of articles related to**  
204 **nutrition competencies for medicine.**

For peer review only

## 205 **Characteristics of included publications**

206  
 207 Included studies were published between 1983 and 2019. The majority were peer-reviewed  
 208 articles (n=7), with the remaining grey literature comprising of documented frameworks from  
 209 expert professional groups (for example, professional associations or accrediting bodies) (n=3)  
 210 and a position statement (n=1). Seven studies were from the USA, with one study from each  
 211 of Australia and New Zealand, Africa, Sweden and the UK.

## 213 **Quality appraisal**

214  
 215 Descriptions of how the competency frameworks were developed varied in level of detail. It is  
 216 important to note that few publications reported the research methods used to develop their  
 217 frameworks. Furthermore, few publications acknowledged the limitations or weaknesses of the  
 218 processes used to develop the competency frameworks (Question 5). Given these limitations,  
 219 articles that did not achieve a 'yes' on all items of the checklist were not excluded from the  
 220 review, but the appraisal was taken into consideration in the overall rigour of the present review  
 221 (Table 2).

222 **Table 2. Quality appraisal**

| 1. Was the research design appropriate to address the aims of the research?<br>2. Was the data collected in a way that addressed the research issue?<br>3. Was the data analysis sufficiently rigorous?<br>4. Is there a clear statement of the study findings?<br>5. Are there limitations or weaknesses of the study acknowledged?<br>6. Is the research valuable? | Q1      | Q2  | Q3      | Q4  | Q5 | Q6  |
|----------------------------------------------------------------------------------------------------------------------------------------------------------------------------------------------------------------------------------------------------------------------------------------------------------------------------------------------------------------------|---------|-----|---------|-----|----|-----|
| American Academy of Family Physicians, 1998                                                                                                                                                                                                                                                                                                                          | Unclear |     |         | Yes | No | Yes |
| Asp et al., 1995                                                                                                                                                                                                                                                                                                                                                     | Unclear |     |         |     |    | Yes |
| Cuerda et al., 2019                                                                                                                                                                                                                                                                                                                                                  | Yes     | Yes | Unclear | Yes | No | Yes |
| Deen, Karp & Lowell, 1994                                                                                                                                                                                                                                                                                                                                            | Unclear |     |         | Yes | No | Yes |
| Deakin University Strategic Teaching and Learning Grant Steering Committee, 2016                                                                                                                                                                                                                                                                                     | Yes     | Yes | Unclear |     | No | Yes |
| Jhpiego & Save the Children, 2012                                                                                                                                                                                                                                                                                                                                    | Yes     | Yes | Yes     | Yes | No | Yes |
| Lindsley et al., 2017                                                                                                                                                                                                                                                                                                                                                | Yes     | Yes | Yes     | Yes | No | Yes |
| Maillet & Young, 1998                                                                                                                                                                                                                                                                                                                                                | Unclear |     |         | Yes | No | Yes |

|                                                                   |         |     |     |     |     |     |
|-------------------------------------------------------------------|---------|-----|-----|-----|-----|-----|
| Sierpina et al., 2016                                             | Unclear |     |     |     | Yes | Yes |
| Young et al., 1983                                                | Yes     | Yes | Yes | Yes | Yes | Yes |
| ICGN Undergraduate Nutrition Education Implementation Group, 2013 | Unclear |     |     |     |     | Yes |

223

## 224 **Competency domains**

225

226 Five of eleven publications (45%) explicitly used competency domains to categorise or sub-  
 227 divide nutrition competencies. Different methods of classification, or domains, included type  
 228 of competency (such as knowledge, skills and attitudes), domains of human nutrition (including  
 229 concepts of basic nutrition, concepts of applied nutrition and principles of clinical nutrition)  
 230 and sub-division of competencies by nutrition concept (for example, macronutrients and  
 231 micronutrients) or by elements of nutrition care (for example, diagnosis, treatment, prevention)  
 232 (38-43). The most common competency domains were related to the role of nutrition in health  
 233 promotion and disease prevention (n=3), nutrition assessment (n=2) and nutrition management  
 234 (n=2) (39, 40, 42). Competency domains which were identified but only found within one  
 235 framework included those related to patient nutrition counselling skills, nutrition referral,  
 236 nutrition evidence, aspects of critical nutrition care (such as enteral and parenteral nutrition)  
 237 and the impact of disease on nutrition (39, 42).

238

239 The Nutrition Competency Framework (NCF) for medical graduates, developed by the Deakin  
 240 University Strategic Teaching and Learning Grant Steering Committee in Australia, was the  
 241 only framework in this review purposefully mapped to a medical framework, namely, the  
 242 Australian Medical Council (AMC) Graduate Outcome Statements (41, 44). Other frameworks  
 243 in this review, published in the United Kingdom, are endorsed by statutory bodies such as the  
 244 General Medical Council (GMC) and Medical Schools Council (42, 45, 46). Some inter-  
 245 disciplinary nutrition competency frameworks also delineated competencies, such as by  
 246 amount of patient education responsibility or by level of service delivery, to emphasise the  
 247 relevance of nutrition competencies for the wider health workforce (47, 48).

248

249 Despite differences in the taxonomy and language across included nutrition competencies for  
 250 medical education, there are some common underlying themes, which in some contexts may  
 251 be considered “domains” if the papers are summarised. Specifically, five common themes were  
 252 identified across the included nutrition competencies, including clinical practice (all 11

1  
2  
3 253 publications), health promotion and disease prevention (n =8), communication (n=7), working  
4 254 as a team (n=7) and professional practice (n=3). These themes overlap with existing medical  
5 255 competency standards and could be considered cross-cutting.  
6  
7  
8  
9

256

## 10 257 **Competencies**

258

13 259 Twenty-five unique nutrition competencies for medical education were identified in the 11  
14 260 publications. Fifteen of twenty-five nutrition competencies for medicine were classified as  
15 261 knowledge/behaviour-based competencies. For example, ‘Demonstrate knowledge of the  
16 262 functions of essential nutrients’ (39, 43). Seven nutrition competencies were classified as skill-  
17 263 based (for example, ‘Demonstrate ability to select and prescribe dietary strategies in the  
18 264 prevention and treatment of disease’ (39, 41-43, 47-51)) and only four competencies were  
19 265 attitude/value-based (for example, ‘Demonstrate sensitivity to the social, cultural, emotional,  
20 266 and psychological factors that may affect an individual’s nutrition behavior and health status’  
21 267 (39) (Table 3). The most common nutrition competencies (suggested in greater than 50% of  
22 268 articles), were related to 1) skills in nutrition assessment, 2) the ability to prescribe dietary  
23 269 interventions in the prevention and treatment of disease, 3) knowledge of the role of nutrition  
24 270 in health promotion and disease prevention and 4) knowledge of the social and cultural  
25 271 importance of food, including food consumption trends and current nutrition  
26 272 recommendations. Authors less commonly suggested the relevance of demonstrating  
27 273 competency in how disease can affect nutritional status, food-borne illness, an awareness of  
28 274 personal health and nutrition and a commitment to provide evidence-based nutrition care for  
29 275 all patients regardless of health status. Articles published in developed countries were more  
30 276 likely to recommend competencies related to nutritional management of chronic diseases,  
31 277 while studies originating from developing countries included competencies related to  
32 278 emergency medicine and nutritional management for people living with HIV and AIDS (39,  
33 279 48). One paper specified cross-cutting nutrition competencies for all health professionals  
34 280 including community mobilisation and nutrition counselling (48).  
35  
36  
37  
38  
39  
40  
41  
42  
43  
44  
45  
46  
47  
48  
49  
50  
51  
52  
53  
54  
55  
56  
57  
58  
59  
60

281 **Table 3. Nutrition competencies for medicine**

282

| Theme and number of publications which include this theme | Domain                                 | Competency                                                                                                                                                                               | Competency Type     | n <sup>a</sup> |
|-----------------------------------------------------------|----------------------------------------|------------------------------------------------------------------------------------------------------------------------------------------------------------------------------------------|---------------------|----------------|
| Clinical Practice<br>n=11 (100%)                          | Nutrition Assessment                   | Demonstrate skills in the assessment of nutritional health including the ability to calculate energy expenditure, nutrition requirements and body composition (21, 38, 39, 41-43, 47-51) | Skill               | 11             |
|                                                           | Nutrition management                   | Demonstrate knowledge of evidence-based dietary strategies for prevention and treatment of disease (21, 38, 39, 41)                                                                      | Knowledge/Behaviour | 4              |
|                                                           |                                        | Demonstrate ability to select and prescribe dietary strategies in the prevention and treatment of disease (39, 41-43, 47-51)                                                             | Skill               | 9              |
|                                                           |                                        | Demonstrate knowledge of possible drug-nutrient interactions and prescribe accordingly (21, 38, 39, 43, 49)                                                                              | Skill               | 5              |
|                                                           |                                        | Demonstrate knowledge of breastfeeding and complementary feeding practices (39, 48)                                                                                                      | Knowledge/Behaviour | 2              |
|                                                           | Nutrition monitoring and evaluation    | Demonstrate the ability to monitor nutrition status and modify dietary recommendations as needed (49, 50)                                                                                | Skill               | 2              |
| Health promotion and disease prevention<br>n=8 (73%)      | Basic sciences as applied to nutrition | Demonstrate knowledge of the basic scientific principles of human nutrition (38, 39, 41)                                                                                                 | Knowledge/Behaviour | 3              |
|                                                           |                                        | Demonstrate knowledge of nutrition applied to different stages of the life cycle (38, 39, 43)                                                                                            | Knowledge/Behaviour | 3              |
|                                                           |                                        | Demonstrate awareness of the nutritional content of food including the major dietary sources of macronutrients and micronutrients (38, 39, 43)                                           | Knowledge/Behaviour | 3              |
|                                                           |                                        | Demonstrate knowledge of the difference between food allergies and food intolerance (38, 39, 43)                                                                                         | Knowledge/Behaviour | 3              |
|                                                           |                                        | Demonstrate knowledge of the functions of essential nutrients (39, 43)                                                                                                                   | Knowledge/Behaviour | 2              |



|                                    |                                                                                                                                                                 |                                                                                                                                                                                    |                                                                                                             |       |
|------------------------------------|-----------------------------------------------------------------------------------------------------------------------------------------------------------------|------------------------------------------------------------------------------------------------------------------------------------------------------------------------------------|-------------------------------------------------------------------------------------------------------------|-------|
|                                    |                                                                                                                                                                 | Demonstrate an understanding of how disease and its management can affect nutritional status (42)                                                                                  | Knowledge/Behaviour                                                                                         | 1     |
|                                    | The role of nutrition in health promotion and disease prevention                                                                                                | Demonstrate an awareness of their own personal health and nutrition (21)                                                                                                           | Attitude/Value                                                                                              | 1     |
|                                    |                                                                                                                                                                 | Demonstrate knowledge of the role of nutrition in health promotion and disease prevention (38, 39, 41-43, 47, 51)                                                                  | Knowledge/Behaviour                                                                                         | 7     |
|                                    |                                                                                                                                                                 | Demonstrate knowledge of the social and cultural importance of food, including awareness of food consumption trends and current nutrition recommendations (21, 38, 39, 41, 43, 51) | Knowledge/Behaviour                                                                                         | 6     |
|                                    |                                                                                                                                                                 | Demonstrate knowledge of nutrition-related causes of mortality and morbidity in the population (21, 38, 51)                                                                        | Knowledge/Behaviour                                                                                         | 3     |
|                                    |                                                                                                                                                                 | Demonstrate knowledge of the principles of public health nutrition, including strategies to reduce the burden of disease (39, 48)                                                  | Knowledge/Behaviour                                                                                         | 2     |
|                                    |                                                                                                                                                                 | Describe food-borne illnesses and outline the process of reporting and investigating outbreaks of these illnesses (39)                                                             | Knowledge/Behaviour                                                                                         | 1     |
| Communication<br>n=7 (64%)         |                                                                                                                                                                 | Nutrition counselling skills                                                                                                                                                       | Demonstrate the ability to effectively provide nutrition education and counselling (21, 38, 39, 43, 47, 50) | Skill |
|                                    | Demonstrate sensitivity to the social, cultural, emotional, and psychological factors that may affect an individual's nutrition behavior and health status (39) |                                                                                                                                                                                    | Attitude/Value                                                                                              | 2     |
| Working as a team<br>n=7 (64%)     | The Multidisciplinary Team Approach to nutrition care                                                                                                           | Demonstrate the ability to work effectively in a multidisciplinary team to deliver nutrition care, including the ability to refer onwards (21, 39, 41, 47, 49)                     | Skill                                                                                                       | 5     |
|                                    |                                                                                                                                                                 | Demonstrate knowledge of the role of other health professionals and community services in the multidisciplinary approach to nutrition care (39, 43, 51)                            | Knowledge/Behaviour                                                                                         | 3     |
| Professional Practice<br>n=3 (27%) | Critical thinking                                                                                                                                               | Demonstrate ability to think critically including the ability to interpret nutrition evidence and apply appropriately in clinical practice (21, 39, 41, 43, 50)                    | Skill                                                                                                       | 3     |
|                                    | Ethics                                                                                                                                                          | Demonstrate the ability to consider and apply principles of ethics related to nutritional management (38, 39, 41)                                                                  | Attitude/Value                                                                                              | 2     |

1  
2  
3  
4  
5  
6  
7  
8  
9  
10  
11  
12  
13  
14  
15  
16  
17  
18  
19  
20  
21  
22  
23  
24  
25  
26  
27  
28  
29  
30  
31  
32  
33  
34  
35  
36  
37  
38  
39  
40  
41  
42  
43  
44  
45  
46

|  |  |                                                                                                                                                                     |                |   |
|--|--|---------------------------------------------------------------------------------------------------------------------------------------------------------------------|----------------|---|
|  |  | Demonstrate a commitment to promote sound nutritional decision-making and appropriate levels of physical activity for all patients regardless of health status (39) | Attitude/Value | 1 |
|--|--|---------------------------------------------------------------------------------------------------------------------------------------------------------------------|----------------|---|

283 <sup>a</sup>Number of articles which include this competency

For peer review only

1  
2  
3 284 **Level of medical education:**  
4

5 285

6  
7 286 All 11 articles specified the level of medical education where there would be an expectation to  
8  
9 287 teach and achieve the nutrition competencies. Five articles included nutrition competencies for  
10  
11 288 undergraduate and graduate (entry-level) medical education. Three of the 11 articles stipulated  
12  
13 289 use by primary care providers and one paper included competencies for family practice  
14  
15 290 residents. The remaining two articles merely specified use by “practicing physicians”.  
16

17

18 292 **Summary of concepts**  
19

20 293

21 294 A summary nutrition competency framework, adapted from Hughes et al. (2012) (20) and  
22  
23 295 informed by the Dreyfus model of skill acquisition, the framework for clinical competency  
24  
25 296 assessment outlined in Miller (1990) and the Knowledge to Action Cycle as described by  
26  
27 297 Graham and colleagues (2006) (20, 27, 28, 52, 53) is presented based on the competencies in  
28  
29 298 the literature (Figure 2). This provides a preliminary model for a nutrition competency  
30  
31 299 framework for medicine, which can be further investigated in subsequent research. In this  
32  
33 300 framework, categories of competency units are delineated into four different tiers to represent  
34  
35 301 hierarchies of competency acquisition and assessment. At the base of the matrix are enabling  
36  
37 302 and critical competencies (know and know how) which underpin higher level nutrition practice  
38  
39 303 behaviours. At a foundational level, the Dunning-Kruger Effect indicates that individuals may  
40  
41 304 be ‘unconsciously unskilled’ (54). The proposed framework also includes common, cross-  
42  
43 305 cutting attributes identified in this review. Cross-cutting competencies delineate the  
44  
45 306 professionalism required for effective, collaborative and safe practice and improve the  
46  
47 307 transferability of the competency framework across health disciplines (20). Top-level practice  
48  
49 308 competencies are defined by Hughes et al. (2012) as “higher order composite behaviours”  
50  
51 309 which are required to “perform complex practice behaviours” which underpin core functions  
52  
53 310 of the profession (20). Practice competencies involve behavioural performance (showing how  
54  
55 311 and doing) and it is hoped the inclusion of these competencies bridges the gap between  
56  
57 312 cognitive competencies and translation in practice (20).  
58  
59  
60

1  
2  
3  
4  
5  
6  
7  
8  
9  
10  
11  
12  
13  
14  
15  
16  
17  
18  
19  
20  
21  
22  
23  
24  
25  
26  
27  
28  
29  
30  
31  
32  
33  
34  
35  
36  
37  
38  
39  
40  
41  
42  
43  
44  
45  
46

313 **Figure 2. Proposed conceptual nutrition competency framework for medicine**

For peer review only

1  
2  
3 314 **DISCUSSION**  
4

5 315

6 316 There is currently no consensus on nutrition competencies relevant for medical education. This  
7 317 review provides a critical synthesis of published nutrition competencies for medical education  
8 318 and practice internationally. This review identified five common themes across nutrition  
9 319 competencies which add to existing literature related to medical nutrition education. Twenty-  
10 320 five unique nutrition competencies for medical education were identified from 11 articles.  
11  
12  
13  
14

15 321

16  
17 322 The five common themes across nutrition competencies for medicine, were clinical practice,  
18 323 health promotion and disease prevention, communication, working as a team and professional  
19 324 practice. The latter three, while referring to nutrition, highlighting generic skills that are  
20 325 required to be applied across all aspects of medical care. This is congruent with core  
21 326 competencies and individual roles in existing medical frameworks, such as the CanMEDS  
22 327 Physician Competency Framework, the Accreditation Council for Graduate Medical Education  
23 328 (ACGME) core competencies, the General Medical Council (GMC) Outcomes for graduates,  
24 329 the Australian Medical Council Limited (AMC) Graduate Outcome Statements and the Royal  
25 330 Australasian College of Physicians (RACP) Professional Practice Framework (44, 55-58). For  
26 331 example, the CanMEDS Physician Competency Framework, one of the most globally  
27 332 recognized health care profession competency frameworks articulates a number of intrinsic  
28 333 roles which reflect key themes identified in this review, such as the Communicator,  
29 334 Collaborator and Health Advocate.  
30  
31  
32  
33  
34  
35  
36  
37  
38

39 335

40  
41 336 Generic themes such as those identified in this review can provide leverage in educational  
42 337 reform, by aligning incentives to facilitate synergy across health care professions (59). For  
43 338 example, a multidisciplinary team (MDT – identified as “working as a team” in this review)  
44 339 approach to nutrition care has been shown to provide high quality, cost-effective nutrition  
45 340 outcomes (60, 61). However, there is a disconnect between the university education  
46 341 environment, which is generally not interdisciplinary, and the practice environment, which  
47 342 increasingly requires collaborative skills (59). Furthermore, communication and collaboration  
48 343 are key aspects of the iterative process of knowledge translation, including the ability to  
49 344 exchange information to overcome barriers to implementation. Communication and  
50 345 collaboration (teamwork) were also common themes identified by this review. Optimized  
51 346 knowledge translation has been shown to improve the quality of evidence-based nutrition care  
52 347 and strengthen the health care system, as summarised by the Knowledge to Action Cycle (53).  
53  
54  
55  
56  
57  
58  
59  
60

1  
2  
3 348 Not only does this cross-over between medical and nutrition competencies highlight the lateral  
4  
5 349 nature of nutrition as a cognate scientific discipline, but it also provides merit to opportunity  
6  
7 350 for the vertical integration of nutrition competencies into existing medical education. Rather  
8  
9 351 than an isolated concept with a distinct set of competencies, existing medical spiral curricula  
10  
11 352 could be enhanced by applying existing medical competencies to a nutrition context. Deen  
12  
13 353 (2006) illustrated this by successfully mapping the Curriculum Committee of the National  
14  
15 354 Academic Award (NAA) learning objectives to the ACGME competencies for competency-  
16  
17 355 based resident evaluation (62). This reiterates the relevance of nutrition as a core facet of  
18  
19 356 clinical practice without necessarily adding time to curricula. Namely, vertical integration of  
20  
21 357 nutrition competencies into medical education is particularly relevant in a crowded curriculum,  
22  
23 358 and is a key element of a successful integrated medical nutrition curriculum, shown to improve  
24  
25 359 medical students' perceptions of nutrition as part of total patient care (63, 64). However, there  
26  
27 360 is a need to first build consensus on nutrition competencies for medical education  
28  
29 361

30  
31 362 The majority of the medical nutrition competencies identified in this review were knowledge-  
32  
33 363 based, while less than 30% of nutrition competencies were skill-based and only four  
34  
35 364 competencies were attitude-based (Table 3). While knowledge-based (enabling) competencies  
36  
37 365 are essential to interpret new concepts in nutrition and underpin higher order (practice)  
38  
39 366 competencies, skill-based competencies are relevant to clinical practice, which requires the  
40  
41 367 complex and judicious application of knowledge, technical skills, clinical reasoning, values and  
42  
43 368 reflection under varied circumstances (36). This is in line with the experience of medical  
44  
45 369 graduates and practising physicians, who do not feel comfortable or adequately prepared to  
46  
47 370 provide nutrition counselling to their patients (10, 16, 65, 66). In order to overcome these  
48  
49 371 barriers, Adams et al., (2010) and Lindsley et al., (2017) emphasise the need for "skill-centred  
50  
51 372 nutrition training" (67). A realist synthesis of educational interventions to improve nutrition  
52  
53 373 care competencies and delivery by doctors and other healthcare professionals, reports that  
54  
55 374 educational interventions which led to improvements in the delivery of nutrition care focused  
56  
57 375 on skills and attitudes rather than just knowledge (68). Skill-based nutrition training has been  
58  
59 376 shown to improve medical students' nutrition knowledge and confidence in lifestyle  
60  
61 377 counselling (69).

62  
63 378  
64  
65 379 While competency frameworks provide an architectural blueprint for constructing educational  
66  
67 380 programmes, the centrality of valid assessment methods to support the life-long journey of  
68  
69 381 competency development cannot be overlooked (19). Increasing the weighting of a topic in

1  
2  
3 382 assessment has been shown to enhance medical students' reported motivation to learn about  
4  
5 383 the topic (70). Furthermore, regular and repeated assessment can improve knowledge retention  
6  
7 384 in medical students (71, 72). This is particularly important given that despite initial high interest  
8  
9 385 in nutrition, interest in and perception of the importance of nutrition may decline during time  
10  
11 386 in medical school (73). Earlier research highlights the effectiveness of the Objective Structured  
12  
13 387 Clinical Exam (OSCE) in evaluating the ability to synthesise and translate knowledge to  
14  
15 388 clinical practice (64). Miller (1990) also emphasises the role of skill-based assessment methods  
16  
17 389 such as the OSCE in the appraisal of technical and clinical competence (74). Problem-based  
18  
19 390 learning tutorials, culinary skills training and clinical case presentations have also been shown  
20  
21 391 to promote active learning and lead to significant changes in participants' knowledge, personal  
22  
23 392 health habits, confidence to provide dietary counselling and ability to nutritionally manage  
24  
25 393 malnutrition (68). A combination of innovative learning strategies is required to support the  
26  
27 394 development of clinical competence. Educational strategies and assessment methods which  
28  
29 395 improve nutrition care competencies, such as problem-based learning and the OSCE, are  
30  
31 396 already widely used methods in medical education (75). Therefore, the application of existing  
32  
33 397 learning to a nutrition context, such as a nutrition OSCE, may lead to improvements in  
34  
35 398 competency to provide nutrition care in future practice. There is currently no consensus on the  
36  
37 399 required nutrition competencies for medicine, which presents a further barrier to the integration  
38  
39 400 of nutrition in medical education (16). The nutrition competencies identified in this review  
40  
41 401 provide a potential benchmark for the nutrition knowledge, skills and attitudes to be included  
42  
43 402 in curricula (Table 3). However, given the lack of consensus on relevant nutrition  
44  
45 403 competencies, commitment of individual institutions to compulsory nutrition education is  
46  
47 404 insufficient and regulation is required. The 2019 report 'Doctoring Our Diet' recommends  
48  
49 405 policy levers to include nutrition in U.S. medical training, such as government investment to  
50  
51 406 provide financial incentive for the inclusion of nutrition in medical training, amending  
52  
53 407 accreditation standards to mandate requirements for nutrition education, increasing  
54  
55 408 representation of nutrition in step and board-examinations and compulsory nutrition training  
56  
57 409 in continuing medical education (17).

410

## 411 **STRENGTHS AND LIMITATIONS**

412

413 This review offers a critical and timely synthesis of medical nutrition competencies and a  
414 conceptual nutrition competency framework. As an integrative review, this framework might  
415 be considered a candidate theory for further review and development. However, this review

1  
2  
3 416 also needs to be considered in the context of its limitations. While the search strategy used  
4  
5 417 included terms previously used to identify competency frameworks, others may exist and  
6  
7 418 therefore some studies may not have been captured. It is recognized that the characteristics of  
8  
9 419 included publications is skewed towards those published in the USA (and English language)  
10  
11 420 and that this may have biased our findings. However, it is relevant to note that there are a  
12  
13 421 greater number of medical education facilities in the USA than other countries included such  
14  
15 422 as Australia, New Zealand and Sweden (76). The majority (6/7) of the included studies were  
16  
17 423 published in developed countries; this may have implications on the generalisability of the  
18  
19 424 proposed nutrition competency framework. We used the Dreyfus model of skill acquisition,  
20  
21 425 Miller's hierarchy for the assessment of clinical competence and the Knowledge to Action  
22  
23 426 Cycle (20, 27, 28, 52, 53) to frame this work, and acknowledge that other frameworks may  
24  
25 427 also be useful in this context. For example, the frameworks used may not consider elements of  
26  
27 428 cognitive aptitude such as diagnostic reasoning.

## 429 430 **CONCLUSION**

431  
432 This review identified five common, cross-cutting themes across nutrition competencies for  
433  
434 medicine: 1) clinical practice, 2) health promotion and disease prevention, 3) communication,  
435  
436 4) working as a team and 5) professional practice. This review also identified twenty-five  
437  
438 nutrition competencies for medicine, the majority of which were knowledge-based. The most  
439  
440 common nutrition competencies were related to nutrition assessment, dietary interventions for  
441  
442 the prevention and treatment of disease, the role of nutrition in health promotion and disease  
443  
444 prevention and knowledge of the social and cultural importance of food. This review  
445  
446 recommends vertical integration of nutrition competencies into existing medical education  
447  
448 based on key, cross-cutting themes, and increased opportunities to engage in relevant, skill-  
449  
450 based nutrition training.  
451  
452  
453  
454  
455  
456  
457  
458  
459  
460



1  
2  
3 **Acknowledgements:** We would like to thank Isla Kuhn, Medical Librarian at the University  
4 of Cambridge for her invaluable input to the search strategy.  
5  
6  
7

8 **Contributors:** BL, EB, KM and SR contributed to the design of the review. BL did the  
9 literature search, performed data analysis and drafted the manuscript. EB contributed to data  
10 extraction. All authors contributed to revision of the manuscript and approval of the final  
11 manuscript. The corresponding author attests that all listed authors meet authorship criteria and  
12 that no others meeting the criteria have been omitted. Patients and/or the public were not  
13 involved in this study.  
14  
15  
16  
17  
18  
19

20 **Funding:** This research received no specific grant from any funding agency in the public,  
21 commercial or not-for-profit sectors.  
22  
23  
24

25 **Competing interests:** None declared.  
26  
27  
28

29 **Patient consent for publication:** Not required  
30  
31  
32  
33  
34  
35  
36  
37  
38  
39  
40  
41  
42  
43  
44  
45  
46  
47  
48  
49  
50  
51  
52  
53  
54  
55  
56  
57  
58  
59  
60

## REFERENCES

1. GBD 2017 Diet Collaborators. Health effects of dietary risks in 195 countries, 1990-2017: a systematic analysis for the Global Burden of Disease Study 2017. *Lancet* 2019;11(393):1958-72. doi: 10.1016/S0140-6736(19)30041-8
2. World Health Organization. The double burden of malnutrition: policy brief. 2017.
3. Gwynn J, Sin K, Searle T, et al. Effect of nutrition interventions on diet-related and health outcomes of Aboriginal and Torres Strait Islander Australians: A systematic review. *BMJ Open* 2019;9(4) doi:
4. Kris-Etherton PM, Akabas SR, Douglas P, et al. Nutrition competencies in health professionals' education and training: a new paradigm. *Advances In Nutrition (Bethesda, Md)* 2015;6(1):83-7. doi: 10.3945/an.114.006734
5. Kominarek M, Rajan P. Nutrition recommendations in pregnancy and lactation. *Med Clin* 2016;100(6):1199-215. doi:
6. Patient and Affordable Care Act, HR 3590, 111th Congress, Sec. 1001. 2010. Available from: <http://www.gpo.gov/fdsys/pkg/BILLS-111hr3590enr/pdf/BILLS-111hr3590enr.pdf> accessed 8 February 2020.
7. Australian Government. Food and Nutrition policy. Canberra, 1992.
8. Ministry of Health. National Healthy Food and Drink Policy (2nd ed). Wellington, 2019.
9. World Health Organization. Mobilising ambitious and impactful commitments for mainstreaming nutrition in health systems: nutrition in universal health coverage - global nutrition summit. Geneva, 2020.
10. Ball LE, Hughes RM, Leveritt MD. Nutrition in general practice: role and workforce preparation expectations of medical educators. *Australian Journal Of Primary Health* 2010;16(4):304-10. doi: 10.1071/PY10014
11. The Royal Australian College of General Practitioners. General Practice: Health of the Nation 2018. East Melbourne, Victoria, 2018.
12. O'Flynn J, Peake H, Hickson M, et al. The prevalence of malnutrition in hospitals can be reduced: Results from three consecutive cross-sectional studies. *Clin Nutr* 2005;24(6):1078-88. doi:
13. Singh H, Watt K, Veitch R, et al. Malnutrition is prevalent in hospitalized medical patients: Are housestaff identifying the malnourished patient? *Nutrition* 2006;22(4):350-4. doi:
14. Kang MC KJ, Ryu SW, Moon JY, Park JH, Park JK, Park JH, Baik HW, Seo JM, Son MW, Song GA, Shin DW, Shin YM, Ahn HY, Yang HK, Yu HC, Yun IJ, Lee JG, Lee JM, Lee JH, Lee TH, Yim H, Jeon HJ, Jung K, Jung MR, Jeong CY, Lim HS, Hong SK; Korean Society for Parenteral and Enteral Nutrition (KSPEN) Clinical Research Groups. Prevalence of Malnutrition in Hospitalized Patients: a Multicenter Cross-sectional Study. *J Korean Med Sci* 2018;33(2):e10. doi: 10.3346/jkms.2018.33.e10
15. van Vliet I, Gomes-Neto A, de Jong M, et al. High prevalence of malnutrition both on hospital admission and predischage. *Nutrition* 2020;77:110814. doi: 10.1016/j.nut.2020.110814
16. Crowley J, Ball L, Hiddink G. Nutrition in medical education: a systematic review. *Lancet Planet Health* 2019;3(9):E379-E89. doi:
17. Food Law and Policy Clinic. Harvard Law School. Doctoring our diet: Policy tool to include nutrition in U.S. medical training. 2019.

18. Hughes R. Competencies for effective public health nutrition practice: a developing consensus. *Public Health Nutrition* 2004;7(5):683-91. doi: 10.1079/phn2003574
19. Gruppen L, Mangrulkar R, Kolars J. The promise of competency-based education in the health professions for improving global health. *Hum Resour Health* 2012;10(43) doi:
20. Hughes R, Shrimpton R, Recine E, et al. Empowering our profession [Commentary] *World Nutr J* 2012;3(2):33-54. doi:
21. Sierpina VS, Welch K, Devries S, et al. What Competencies Should Medical Students Attain in Nutritional Medicine? *Explore (New York, NY)* 2016;12(2):146-7. doi: 10.1016/j.explore.2015.12.012
22. United Nations Decade of Action on Nutrition 2016-2025: United Nations. 2020. Available from: <https://www.un.org/nutrition/about> accessed 8 May 2020.
23. Torraco RJ. Writing integrative literature reviews: Guidelines and examples. *Hum Resour Manag Rev* 2005;4:356-67. doi:
24. Whittemore R, Knafl K. The integrative review: Updated methodology. *J Adv Nurs* 2005;52(2):546-53. doi: <https://doi.org/10.1111/j.1365-2648.2005.03621.x>
25. Halcomb E, Stephens M, Bryce J, et al. Nursing competency standards in primary health care: an integrative review. *J Clin Nurs* 2016;25:1193-205. doi: doi: 10.1111/jocn.13224
26. Whittemore R, Knafl, K. The integrative review: Updated methodology. *Journal of advanced nursing* 2005;52(5):546-53. doi:
27. Miller GE. The assessment of clinical skills/competence/performance. *Acad Med* 1990;65(9):s63-s7. doi:
28. Benner P. Use of the Dreyfus model of skill acquisition to describe and interpret skill acquisition and clinical judgement in nursing practice and education. *Bull Sci Technol Soc* 2005;24:188-99. doi:
29. Graham I, Tetroe J, Pearson A. *Turning Knowledge into Action: Practical Guidance on How to Do Integrated Knowledge Translation Research*. Lippincott Williams & Wilkins 2014.
30. Field A. Understanding the Dreyfus model of skill acquisition to improve ultrasound training for obstetrics and gynaecology trainees. *Ultrasound* 2014;22(2):118-22. doi: 10.1177/1742271X14521125
31. Mitchell E, Arora S. How educational theory can inform the training and practice of vascular surgeons. *Journal of Vascular Surgery* 2012;56(2):530-7. doi: <https://doi.org/10.1016/j.jvs.2012.01.065>
32. Sadideen H, Plonczak A, Saadeddin M, et al. How Educational Theory Can Inform the Training and Practice of Plastic Surgeons. *Plast Reconstr Surg Glob Open* 2018;6(12) doi: 10.1097/GOX.0000000000002042
33. Carr S. Assessing clinical competency in medical senior house officers: how and why should we do it? *Postgrad Med J* 2004;80:63-6. doi: 10.1136/pmj.2003.011718
34. Verma S, Paterson M, Medves J. Core competencies for health care professionals: What medicine, nursing, occupational therapy, and physiotherapy share. *J Allied Health* 2006;35:109-15. doi:
35. Epstein RM, Hundert EM. Defining and assessing professional competence. *JAMA* 2002;287(2):226-35. doi:
36. Benner P. From novice to expert. *Am J Nurs* 1982:402-7. doi:
37. Frankson R, Hueston W, Christian K, et al. One Health Core Competency Domains. *Front Public Health* 2016;4 doi: doi: 10.3389/fpubh.2016.00192

- 1
- 2
- 3
- 4 38. Cuerda C, Muscaritoli M, Donini LM, et al. Nutrition education in medical schools
- 5 (NEMS). An ESPEN position paper. *Clinical Nutrition* 2019;38(3):969-74. doi:
- 6 10.1016/j.clnu.2019.02.001
- 7 39. Lindsley JE, Abali EE, Bikman BT, et al. What Nutrition-Related Knowledge, Skills, and
- 8 Attitudes Should Medical Students Develop? *Medical Science Educator* 2017;27(4):579-83.
- 9 doi: 10.1007/s40670-017-0476-3
- 10 40. Akner G, Andersson H, Forsum E, et al. A national document on clinical nutrition.
- 11 Developmental work for improvement of medical education. *Lakartidningen*
- 12 1997;94(18):1731-9. doi:
- 13 41. Deakin University Strategic Teaching and Learning Grant Steering Committee.
- 14 Extended Nutrition Competency Framework (NCF). Committee DUSTaLGS, 2016.
- 15 42. ICGN Undergraduate Nutrition Education Implementation Group. ICGN
- 16 Undergraduate Curriculum in Nutrition. Group IUNEI, 2013.
- 17 43. Recommended core educational guidelines on nutrition for family practice residents.
- 18 *American Family Physician* 1989;40(1):265-6. doi:
- 19 44. Australian Medical Council Limited. Accreditation Standards for Primary Medical
- 20 Education Providers and their Program of Study and Graduate Outcome Statements. Limited
- 21 AMC, 2012.
- 22 45. General Medical Council: General Medical Council. 2020. Available from:
- 23 <https://www.gmc-uk.org/> accessed.
- 24 46. Medical Schools Council: Home: Medical Schools Council (MSC). 2020. Available
- 25 from: <https://www.medschools.ac.uk/> accessed 3 June 2020.
- 26 47. Maillet JO, Young EA. ADA reports. Position of The American Dietetic Association:
- 27 nutrition education for health care professionals. *Journal of the American Dietetic*
- 28 *Association* 1998;98(3):343-6. doi:
- 29 48. Jhpiego & Save the Children. Nutrition core competencies for health science cadres
- 30 and undergraduate nutritionists in Ethiopia. 2012.
- 31 49. Young EA, Weser E, McBride HM, et al. Development of core competencies in clinical
- 32 nutrition. *The American Journal Of Clinical Nutrition* 1983;38(5):800-10. doi:
- 33 50. Deen D, Jr., Karp R, Lowell B. A new approach to nutrition education for primary care
- 34 physicians in the United States. *Journal Of General Internal Medicine* 1994;9(7):407-8. doi:
- 35 51. Asp NG, Akner G, Forsum E, et al. Nutrition in Swedish medical education. *Nordisk*
- 36 *medicin* 1995;110(11):292-3. doi:
- 37 52. Dreyfus S, Dreyfus, H. A five-stage model of the mental activities involved in directed
- 38 skill acquisition and clinical judgement in nursing practice and education. University of
- 39 California: Berkeley 1980.
- 40 53. Laur C, Keller, H. Implementing best practice in hospital multidisciplinary nutritional
- 41 care: an example of using the knowledge-to-action process for a research program. *Journal*
- 42 *of Multidisciplinary Healthcare* 2015;8:463-72. doi:
- 43 54. Dunning D. Chapter Five - The Dunning-Kruger Effect: On Being Ignorant of One's
- 44 Own Ignorance. *Adv Exp Soc Psychol* 2011;44:247-96. doi:
- 45 55. Royal College of Physicians and Surgeons of Canada. CanMEDS 2015 Physician
- 46 Competency Framework. Ottawa, 2015.
- 47 56. Accreditation Council for Graduate Medical Education (ACGME). ACGME Outcome
- 48 Project. 2007.
- 49
- 50
- 51
- 52
- 53
- 54
- 55
- 56
- 57
- 58
- 59
- 60

- 1
- 2
- 3
- 4 57. Professional Practice Framework: Royal Australasian College of Physicians (RACP).  
5 2020. Available from: [https://www.racp.edu.au/trainees/curricula/professional-practice-  
7 framework](https://www.racp.edu.au/trainees/curricula/professional-practice-<br/>6 framework) accessed 10 June 2020.
- 8 58. General Medical Council (GMC). Outcomes for graduates 2018. London, UK, 2018.
- 9 59. Institute of Medicine (IOM). Health Professions Education: A bridge to quality. Press  
10 NA, 2003.
- 11 60. Butcher M. P1.29: The impact of a nutrition multidisciplinary team. Transplantation  
12 2019;103(7S2):S73-S4. doi: doi: 10.1097/01.tp.0000575832.73538.eb
- 13 61. Rasmussen N, Belqaid K, Lugnet K, et al. Effectiveness of multidisciplinary nutritional  
14 support in older hospitalised patients: A systematic review and meta-analyses. Clin Nutr  
15 ESPEN 2018;27:P44-52. doi:  
16
- 17 62. Deen D. How can nutrition education contribute to competency-based resident  
18 evaluation? Am J Clin Nutr 2006;976S-80S. doi:  
19
- 20 63. Krebs N, Primak L. Comprehensive integration of nutrition into medical training. Am J  
21 Clin Nutr 2006;945S-50S. doi:  
22
- 23 64. Taren D, Thomson C, Koff N, et al. Effect of an integrated nutrition curriculum on  
24 medical education, student clinical performance, and student perception of medical-  
25 nutrition training. Am J Clin Nutr 2001;73(6):1107-12. doi:  
26 <https://doi.org/10.1093/ajcn/73.6.1107>
- 27 65. Levine B, Wigren M, Chapman D, et al. A national survey of attitudes and practices of  
28 primary-care physicians relating to nutrition: strategies for enhancing the use of clinical  
29 nutrition in medical practice. Am J Clin Nutr 1993;57:115-9. doi:  
30
- 31 66. Soltesz K, Price J, Johnson L, et al. Family physicians' views of the preventive services  
32 task force recommendations regarding nutritional counseling. Arch Fam Med 1995;4:589-  
33 93. doi:  
34
- 35 67. Adams KM, Kohlmeier M, Powell M, et al. Nutrition in medicine: nutrition education  
36 for medical students and residents. Nutrition in clinical practice : official publication of the  
37 American Society for Parenteral and Enteral Nutrition 2010;25(5):471-80. doi:  
38
- 39 68. Mogre V, Scherpbier, A.J.J.A., Stevens, F., Aryee, P., Cherry, M.G. & Dornan, T. Realist  
40 synthesis of educational interventions to improve nutrition care competencies and delivery  
41 by doctors and other healthcare professionals. BMJ Open 2016;6:e010084. doi:  
42
- 43 69. Pang B, Memel Z, Diamant C, et al. Culinary medicine and community partnership:  
44 hands-on culinary skills training to empower medical students to provide patient-centered  
45 nutrition education. Med Educ Online 2019;24(1) doi:  
46
- 47 70. Wormald BW, Schoeman S, Somasunderam A, et al. Assessment Drives Learning: An  
48 Unavoidable Truth? Anat Sci Educ 2009;2(5):199-204. doi: DOI: 10.1002/ase.102
- 49 71. Larsen D, Butler A, Roediger H. Test-enhanced learning in medical education. Med  
50 Educ 2008;42:959-66. doi:  
51
- 52 72. Kromann C, Jensen M, Ringsted C. The effect of testing on skills learning. Med Educ  
53 2009;43:21-7. doi:  
54
- 55 73. Morgan SL, Weinsier RL, Boker JR, et al. A comparison of nutrition knowledge of  
56 freshmen and senior medical students: a collaborative study of southeastern medical  
57 schools. Journal Of The American College Of Nutrition 1988;7(3):193-7. doi:  
58
- 59 74. Miller G. The assessment of clinical skills/competence/performance. Academic  
60 Medicine 1990;65(9):s63-7. doi:

1  
2  
3 75. Witheridge A, Ferns, G. & Scott-Smith, W. Revisiting Miller's pyramid in medical  
4 education: the gap between traditional assessment and diagnostic reasoning. Int J Med  
5 Educ 2019;10:191-2. doi: doi: 10.5116/ijme.5d9b.0c37

6  
7 76. World Directory of Medical Schools: World Federation for Medical Education (WFME  
8 ) & Foundation for Advancement of International Medical Education and Research  
9 (FAIMER). 2020. Available from: <https://search.wdoms.org/> accessed September 1 2020.  
10  
11  
12  
13  
14  
15  
16  
17  
18  
19  
20  
21  
22  
23  
24  
25  
26  
27  
28  
29  
30  
31  
32  
33  
34  
35  
36  
37  
38  
39  
40  
41  
42  
43  
44  
45  
46  
47  
48  
49  
50  
51  
52  
53  
54  
55  
56  
57  
58  
59  
60

For peer review only

**Figure 1. PRISMA flow diagram for identification of articles related to nutrition competencies for medicine.**

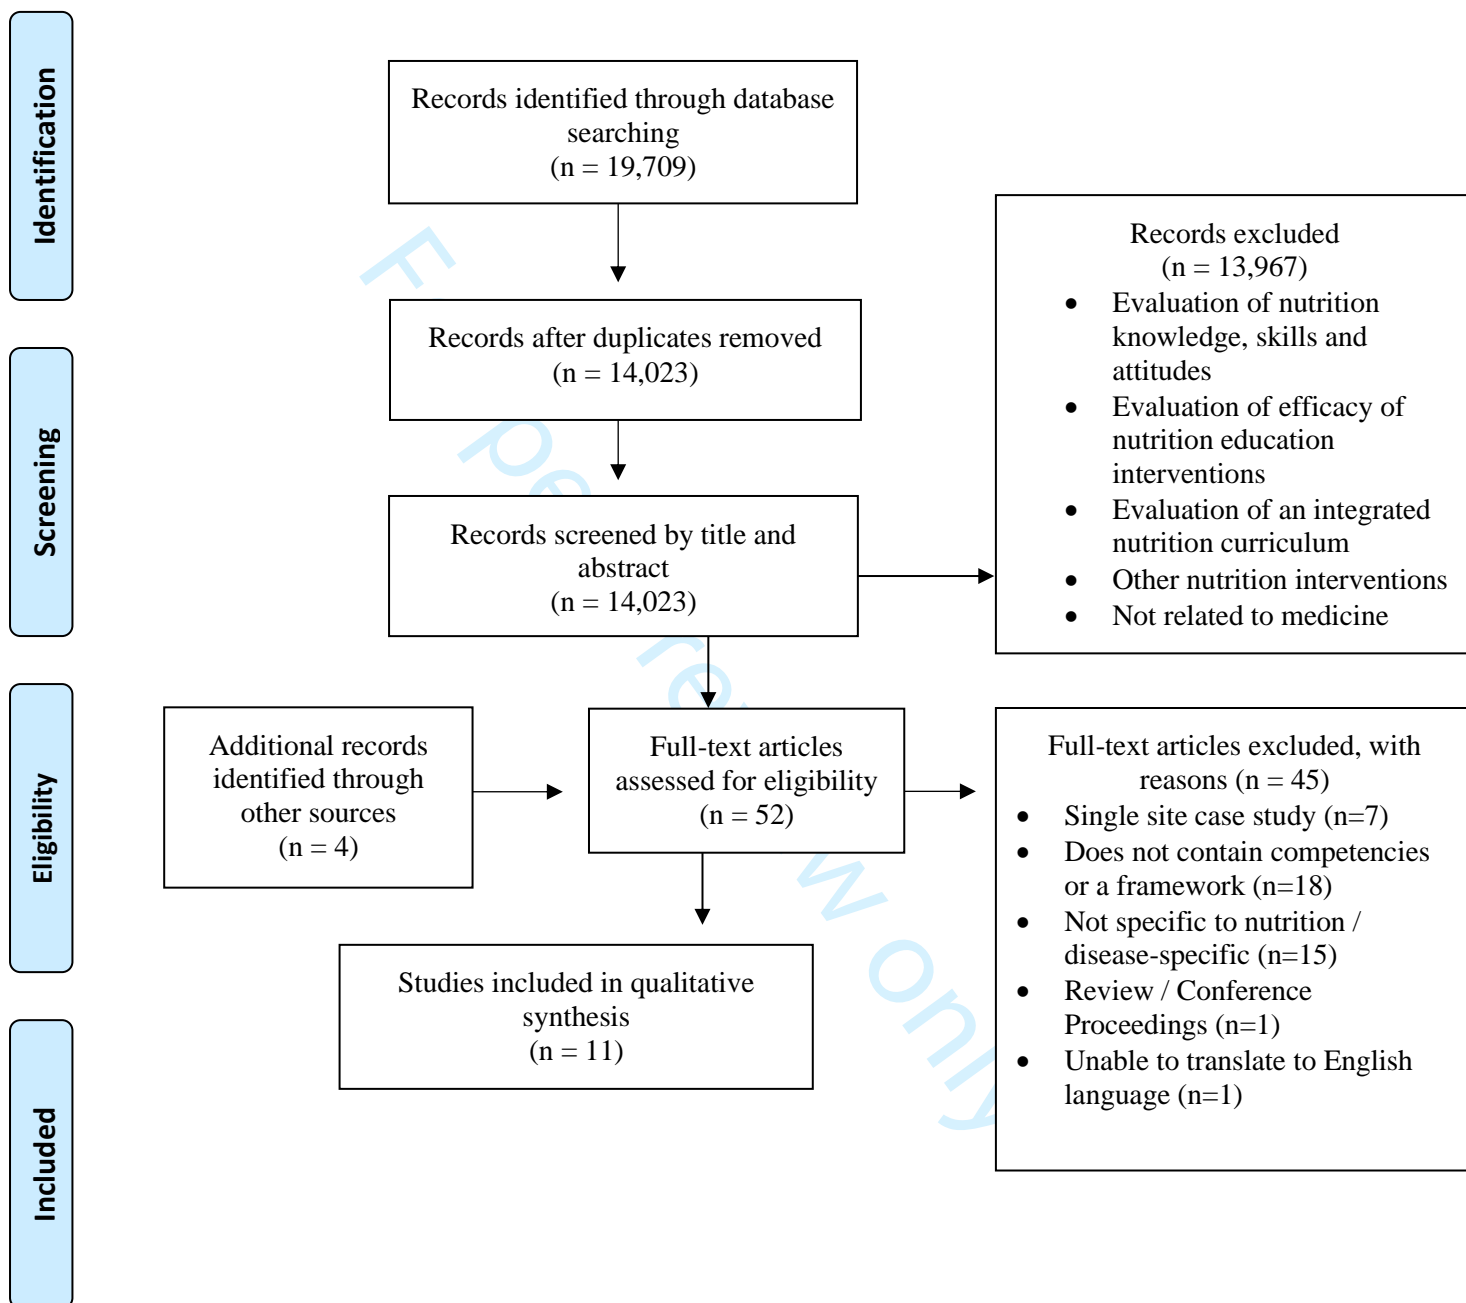

Figure 2. Proposed conceptual nutrition competency framework for medicine

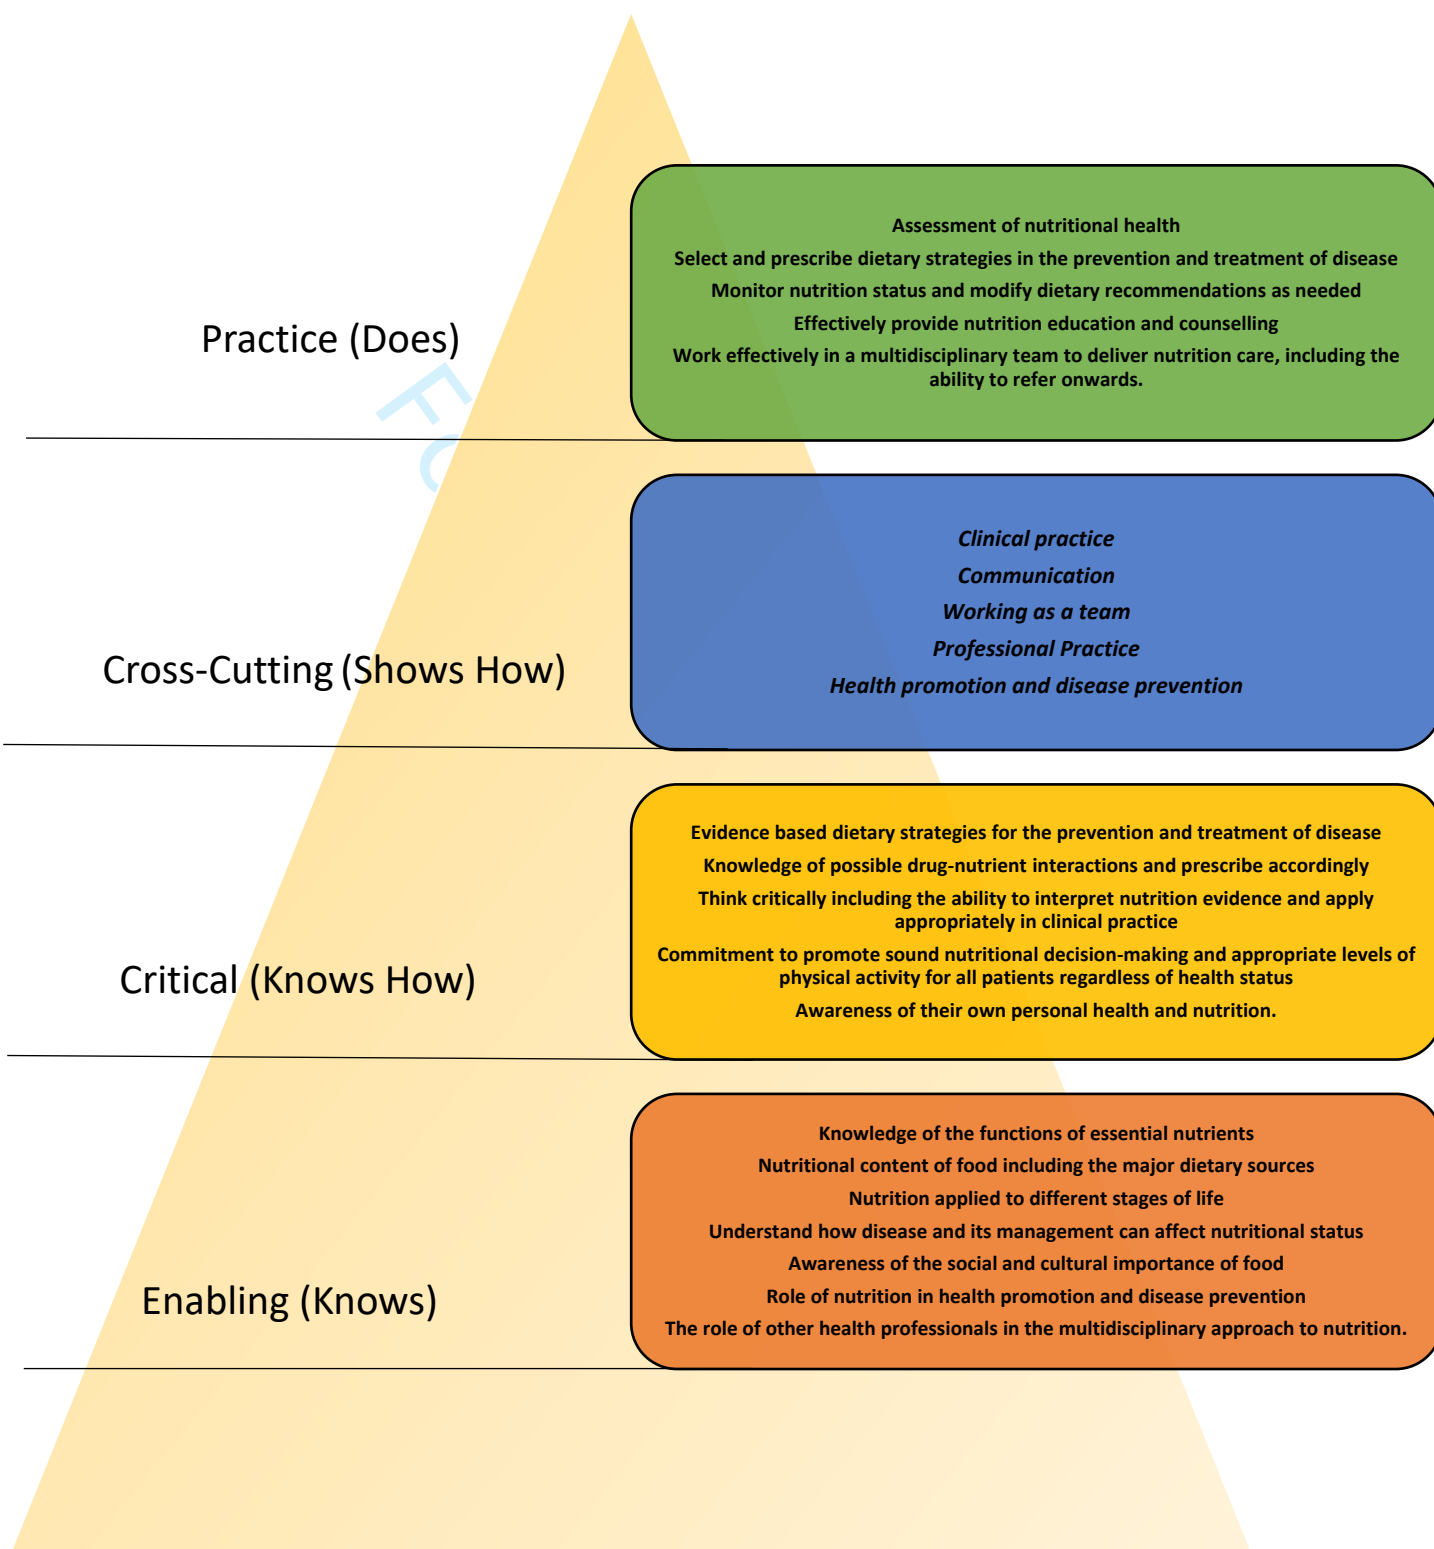



## Supplementary Materials 1 – Search Strategy

| Data base                         | Search terms                                                                                                                                                                                                                                                                                                                                                                                                                                                                                                                                                                                                                                                                                                                                                                                                                                                                                                                                                                                                                                                                                                              | Results |
|-----------------------------------|---------------------------------------------------------------------------------------------------------------------------------------------------------------------------------------------------------------------------------------------------------------------------------------------------------------------------------------------------------------------------------------------------------------------------------------------------------------------------------------------------------------------------------------------------------------------------------------------------------------------------------------------------------------------------------------------------------------------------------------------------------------------------------------------------------------------------------------------------------------------------------------------------------------------------------------------------------------------------------------------------------------------------------------------------------------------------------------------------------------------------|---------|
| <b>CINAHL Plus with Full Text</b> | (((“doctor*” OR (“physicians+”)) OR (“medical student*”) OR (“students, medical”) OR (“(medic* OR doctor* OR clinical*) N2 student*”) OR (“general practitioner” OR family doctor* OR family physician*”) OR (“physicians, family”) OR (“interns and residents”) OR “medical N3 (specialist* OR intern* OR resident*”)” OR (specialist registrar* OR (clinical specialist*) OR (“education, medical+”) OR “medical education” OR (“education, medical, continuing”) OR (“undergraduate medical education”) OR (“postgraduate medical education”) OR (“nutrition education) OR “nutrition education” OR (“nutritional physiology+”) OR (“medical nutrition education”) AND (“nutrition”) OR “nutrition*” OR (“public health nutrition”) OR (“nutrition services+”) OR (“nutrition policy+”) OR (“diet”) OR “diet*” OR (“life style+”) OR “lifestyle”) AND ((competen*) OR (“clinical competence+”) OR “clinical competen*”) OR (“education, competency-based”) OR “competency-based education”) OR (“curriculum+”) OR “curricul*”) OR (“competency framework*” OR (“professional competence+”) OR (competency standard*))) | 2650    |
| <b>Embase</b>                     | (((doctor*) OR (physician* OR ‘physician’/exp) OR (‘hospital physician’/exp) OR (medical student* OR ‘medical student’/exp) OR ((medic* OR doctor* OR clinical*) NEAR/2 student*) OR (medical NEAR/3 (specialist* OR intern* OR resident*)) OR (specialist registrar* OR ‘medical specialist’/exp) OR (clinical specialist*) OR (medical education OR ‘medical education’/exp) OR (undergraduate medical education) OR (graduate medical education OR ‘residency education’/exp) OR (nutrition education OR ‘nutrition education’/exp OR ‘health education’/exp) OR (medical nutrition education)) AND ((nutrition* OR ‘nutrition’/exp OR ‘nutrition service’/exp) OR (diet* OR ‘diet’/exp) OR (lifestyle* OR ‘lifestyle’/exp OR ‘lifestyle modification’/exp)) AND ((competen* OR ‘competence’/exp) OR (clinical competen* OR ‘clinical competence’/exp) OR (curricul* OR ‘curriculum’/exp OR ‘medical school’/exp) OR (competency framework* OR ‘professional competence’/exp) OR (competency standard*))                                                                                                               | 7695    |
| <b>Global Health</b>              | (((doctor* OR physician+) OR (medical student* OR medical students) OR ((medic* OR doctor* OR clinical*) N2 student*) OR ((general practitioner* OR gp* OR family doctor* OR family physician*) OR general practitioners) OR (medical N3 (specialist* OR intern* OR resident*)) OR (specialist registrar*) OR (clinical specialist*) OR (medical                                                                                                                                                                                                                                                                                                                                                                                                                                                                                                                                                                                                                                                                                                                                                                          | 1280    |

|                       |                                                                                                                                                                                                                                                                                                                                                                                                                                                                                                                                                                                                                                                                                                                                                                                                                                                                                                                                                                                                                     |      |
|-----------------------|---------------------------------------------------------------------------------------------------------------------------------------------------------------------------------------------------------------------------------------------------------------------------------------------------------------------------------------------------------------------------------------------------------------------------------------------------------------------------------------------------------------------------------------------------------------------------------------------------------------------------------------------------------------------------------------------------------------------------------------------------------------------------------------------------------------------------------------------------------------------------------------------------------------------------------------------------------------------------------------------------------------------|------|
|                       | education OR medical education+) OR (undergraduate medical education OR medical schools) OR (graduate medical education OR continuing education OR medicine+) OR (nutrition education) OR (medical nutrition education)) AND ((nutrition* OR nutrition+ OR nutrition programmes OR nutrition physiology OR nutrition planning OR nutrition information OR clinical nutrition OR community nutrition OR nutritional support OR nutritional intervention OR nutritional assessment) OR (diet* OR diet OR diet counselling OR diet planning) OR (lifestyle* OR lifestyle)) AND ((competen* OR professional competence) OR (clinical competen*) OR (competency-based education) OR (curricul* OR curriculum+ OR curriculum guides) OR (competency framework*) OR (competency standard*))                                                                                                                                                                                                                                |      |
| <b>Medline</b>        | ((("doctor*") OR ("physician*") OR ((medic* OR doctor* OR clinical*) NEAR/2 "student*") OR ("medical student*") OR ("general practitioner* OR gp* OR family doctor* OR family physician*") OR "physicians, family" OR "general practitioners") OR ((("medical NEAR/3 (specialist* OR intern* OR resident*") OR "internship and residency" OR "internal medicine+") OR ("specialist registrar*") OR ("clinical specialist*") OR ("medical education" OR "education, medical+" OR "education, medical, undergraduate+" OR "education, medical, continuing" OR "education, premedical") OR ("postgraduate medical education") OR ("nutrition education" OR "nutritional sciences+")) AND ((competen*) OR ("competency-based education" OR "clinical competence" OR "professional competence+") OR ("curricul*" OR "curriculum+") OR ("competency framework*") OR ("competency standard*")) AND ("nutrition*" OR "nutrition therapy+") OR ("diet*" OR "diet+" OR "diet therapy+") OR ("lifestyle*" OR "life style+")))) | 3605 |
| <b>Scopus</b>         | ((("doctor* OR ((medic* OR doctor* OR clinical*) W/2 student*) OR ("medical student") OR ("general practitioner*" OR gp* OR "family doctor*" OR "family physician*") OR (medical W/3 (specialist* OR intern* OR resident*)) OR (specialist registrar*) OR ("clinical specialist*") OR ("medical education") OR ("undergraduate medical education") OR ("postgraduate medical education")) AND ((nutrition*) OR (diet*) OR (lifestyle* OR "life style")) AND ((competen*) OR ("clinical competen*") OR ("competency-based education") OR (curricul*) OR ("competency framework") OR ("competency standard*"))))                                                                                                                                                                                                                                                                                                                                                                                                      | 2382 |
| <b>Web of Science</b> | ((("doctor*") OR (physician*) OR (medical student*) OR (student* NEAR/2 (medic* OR doctor* OR clinical*)) OR (general practitioner* OR gp OR family doctor* OR family physician*) OR (medical NEAR/3 (specialist* OR intern* OR resident*)) OR (specialist registrar*) OR (clinical                                                                                                                                                                                                                                                                                                                                                                                                                                                                                                                                                                                                                                                                                                                                 | 2097 |

|                                       |                                                                                                                                                                                                                                                                                                                                                                                                            |              |
|---------------------------------------|------------------------------------------------------------------------------------------------------------------------------------------------------------------------------------------------------------------------------------------------------------------------------------------------------------------------------------------------------------------------------------------------------------|--------------|
|                                       | specialist*) OR (medical education) OR (undergraduate medical education) OR (postgraduate medical education) OR (nutrition education) OR (medical nutrition education)) AND ((nutrition*) OR (diet*) OR (lifestyle* OR life style)) AND ((competen* OR (clinical competen* OR (competency-based education) OR (curricul* OR (competency frameworkl* OR (professional competen* OR (competency standard*))) |              |
| <b>Total yield from all databases</b> |                                                                                                                                                                                                                                                                                                                                                                                                            | <b>19709</b> |

For peer review only

## Supplementary Materials 2 – List of excluded studies along with reasons for exclusion

Full-text articles excluded, with reasons (n=45)

- Single site case study (n=7)
- Does not contain competencies or a framework (n=18)
- Not specific to nutrition / disease-specific (n=15)
- Review / Conference Proceedings (n=1)
- Unable to translate to English language (n=1)

| Study                                                   | Reason for Exclusion                                                                                    |
|---------------------------------------------------------|---------------------------------------------------------------------------------------------------------|
| Adams et al., 2010                                      | Does not contain competencies or a framework                                                            |
| Akner & Vessby, 1997                                    | Does not contain competencies or a framework                                                            |
| Al-Nimr et al., 2019                                    | Single site case study (Not formally adopted or endorsed)                                               |
| Asp et al., 1995                                        | Does not contain competencies or a framework                                                            |
| Aspry et al., 2018                                      | Framework not specific to nutrition (Competencies for ASCVD prevention)                                 |
| Bairey Merz et al., 2009                                | Framework not specific to nutrition (Competencies specific to the prevention of cardiovascular disease) |
| Bakemeier et al., 1989                                  | Framework not specific to nutrition (Nutrition and cancer education objectives)                         |
| Ball et al., 2010                                       | Single site case study (Not formally adopted or endorsed)                                               |
| Brodribb et al., 2012                                   | Framework not specific to nutrition (Competencies specific to breastfeeding)                            |
| Chamberlain et al., 1989                                | Does not contain competencies or a framework                                                            |
| Cooksey et al., 2000                                    | Does not contain competencies or a framework                                                            |
| Cresci et al., 2019                                     | Does not include competencies or a framework                                                            |
| Committee of the Nutrition Academic Award Program, 2002 | Does not contain competencies or a framework                                                            |
| Dahl, 2006                                              | Does not include competencies or a framework                                                            |
| Edwards & Rosenfeld, 2006                               | Single site case study (Not formally adopted or endorsed)                                               |
| Gallagher et al., 1979                                  | Does not contain competencies or a framework                                                            |
| Hark et al., 2000                                       | Single site case study (Not formally adopted or endorsed)                                               |
| Heimbürger, 2002                                        | Does not contain competencies or a framework                                                            |
| Heimbürger, 2006                                        | Does not contain competencies or a framework                                                            |
| Hivert et al., 2016                                     | Does not contain competencies or a framework                                                            |
| Huang et al., 2009                                      | Framework not specific to nutrition (Health and obesity: prevention and education curriculum)           |
| Jackson, 2001                                           | Review article                                                                                          |
| Jensen & Hesso, 1991                                    | Does not contain competencies or a framework                                                            |
| Kaye et al., 2018                                       | Does not contain competencies or a framework                                                            |
| Kelly et al., 2019                                      | Framework not specific to nutrition (Competencies for lifestyle medicine intensivists)                  |

|                                               |                                                                                                                           |
|-----------------------------------------------|---------------------------------------------------------------------------------------------------------------------------|
| Kligler et al., 2004                          | Framework not specific to nutrition (Competencies in integrative medicine)                                                |
| Kushner et al., 2019                          | Framework not specific to nutrition (Obesity competencies)                                                                |
| Lianov et al., 2010                           | Framework not specific to nutrition (Physician competencies for prescribing lifestyle medicine)                           |
| Lin et al., 1999                              | Unable to translate to English from Chinese                                                                               |
| Maiburg et al., 2004                          | Single site case study (Not formally adopted or endorsed)                                                                 |
| Milla, 2002                                   | Framework not specific to nutrition (European training syllabus in paediatric gastroenterology, hepatology and nutrition) |
| Mularski et al., 1997                         | Does not contain competencies or a framework                                                                              |
| Mulder et al., 2016                           | Single site case study (Not formally adopted or endorsed)                                                                 |
| Powell-Tuck et al., 1997                      | Does not contain competencies or a framework (course evaluation)                                                          |
| Ray et al., 2010                              | Does not contain competencies or a framework                                                                              |
| Rock et al., 1995                             | Does not contain competencies or a framework                                                                              |
| Rudolph et al., 1999                          | Framework not specific to nutrition (NASPGN guidelines for training in paediatric gastroenterology)                       |
| Ryen et al., 2003                             | Framework not specific to nutrition (Gastroenterology core curriculum)                                                    |
| Scolapio et al., 2008                         | Does not contain competencies or a framework                                                                              |
| Somannavar, 2012                              | Single site case study (Not formally adopted or endorsed)                                                                 |
| The Gastroenterology Leadership Council, 1996 | Framework not specific to nutrition (Gastroenterology core curriculum)                                                    |
| Trilk et al., 2019                            | Framework not specific to nutrition (Lifestyle medicine curriculum)                                                       |
| Weinsier et al., 1989                         | Does not contain competencies or a framework (Priority rankings for nutrition topics to be included in curriculum)        |
| Winick, 1993                                  | Does not contain competencies or a framework                                                                              |
| Withers et al., 2019                          | Framework not specific to nutrition (Core competencies in global health training)                                         |

# BMJ Open

## Nutrition Competencies for Medicine: An Integrative Review and Critical Synthesis

|                                 |                                                                                                                                                                                                                                                                                                                                                                                                                                                                                               |
|---------------------------------|-----------------------------------------------------------------------------------------------------------------------------------------------------------------------------------------------------------------------------------------------------------------------------------------------------------------------------------------------------------------------------------------------------------------------------------------------------------------------------------------------|
| Journal:                        | <i>BMJ Open</i>                                                                                                                                                                                                                                                                                                                                                                                                                                                                               |
| Manuscript ID                   | bmjopen-2020-043066.R2                                                                                                                                                                                                                                                                                                                                                                                                                                                                        |
| Article Type:                   | Original research                                                                                                                                                                                                                                                                                                                                                                                                                                                                             |
| Date Submitted by the Author:   | 22-Feb-2021                                                                                                                                                                                                                                                                                                                                                                                                                                                                                   |
| Complete List of Authors:       | Lepre, Breanna; University of Wollongong, School of Medicine; NNEdPro Global Centre for Nutrition and Health, Mansfield, Kylie; University of Wollongong, School of Medicine, University of Wollongong, and Illawarra Health & Medical Research Institute Ray, Sumantra; NNEdPro Global Centre for Nutrition and Health, St. John's Innovation Centre Beck, Eleanor; University of Wollongong, School of Medicine, University of Wollongong and Illawarra Health & Medical Research Institute |
| <b>Primary Subject Heading</b>: | Medical education and training                                                                                                                                                                                                                                                                                                                                                                                                                                                                |
| Secondary Subject Heading:      | Nutrition and metabolism                                                                                                                                                                                                                                                                                                                                                                                                                                                                      |
| Keywords:                       | MEDICAL EDUCATION & TRAINING, NUTRITION & DIETETICS, EDUCATION & TRAINING (see Medical Education & Training)                                                                                                                                                                                                                                                                                                                                                                                  |
|                                 |                                                                                                                                                                                                                                                                                                                                                                                                                                                                                               |

SCHOLARONE™  
Manuscripts



I, the Submitting Author has the right to grant and does grant on behalf of all authors of the Work (as defined in the below author licence), an exclusive licence and/or a non-exclusive licence for contributions from authors who are: i) UK Crown employees; ii) where BMJ has agreed a CC-BY licence shall apply, and/or iii) in accordance with the terms applicable for US Federal Government officers or employees acting as part of their official duties; on a worldwide, perpetual, irrevocable, royalty-free basis to BMJ Publishing Group Ltd ("BMJ") its licensees and where the relevant Journal is co-owned by BMJ to the co-owners of the Journal, to publish the Work in this journal and any other BMJ products and to exploit all rights, as set out in our [licence](#).

The Submitting Author accepts and understands that any supply made under these terms is made by BMJ to the Submitting Author unless you are acting as an employee on behalf of your employer or a postgraduate student of an affiliated institution which is paying any applicable article publishing charge ("APC") for Open Access articles. Where the Submitting Author wishes to make the Work available on an Open Access basis (and intends to pay the relevant APC), the terms of reuse of such Open Access shall be governed by a Creative Commons licence – details of these licences and which [Creative Commons](#) licence will apply to this Work are set out in our licence referred to above.

Other than as permitted in any relevant BMJ Author's Self Archiving Policies, I confirm this Work has not been accepted for publication elsewhere, is not being considered for publication elsewhere and does not duplicate material already published. I confirm all authors consent to publication of this Work and authorise the granting of this licence.

1  
2  
3  
4  
5  
6  
7  
8  
9  
10 **Nutrition Competencies for Medicine: An Integrative Review and**  
11 **Critical Synthesis**  
12  
13  
14  
15  
16  
17  
18  
19  
20  
21  
22  
23  
24  
25  
26  
27  
28  
29  
30  
31  
32  
33  
34  
35  
36  
37  
38  
39  
40  
41  
42  
43  
44  
45  
46  
47  
48  
49  
50  
51  
52  
53  
54  
55  
56  
57  
58  
59  
60

For peer review only



**Corresponding Author:****Breanna Lepre**Email: [bl778@uowmail.edu.au](mailto:bl778@uowmail.edu.au)

School of Medicine, University of Wollongong, and Illawarra Health & Medical  
Research Institute, Northfields Ave, Wollongong NSW 2522, Australia

NNEdPro Global Centre for Nutrition and Health, St. John's Innovation Centre, Cowley  
Road, Cambridge CB4 0WS, UK

**Co-Author(s):****1. Kylie J Mansfield**

School of Medicine, University of Wollongong, Wollongong NSW 2522, Australia

**2. Shumone (Sumantra) Ray**

NNEdPro Global Centre for Nutrition and Health, St. John's Innovation Centre, Cowley  
Road, Cambridge, UK

**3. Eleanor J Beck**

School of Medicine, University of Wollongong and Illawarra Health & Medical Research  
Institute, Wollongong NSW 2522, Australia

**Word Count (excluding title page, abstract, references, figures and tables): 4000**

## 1 ABSTRACT

2  
3  
4  
5  
6  
7  
8  
9  
10  
11  
12  
13  
14  
15  
16  
17  
18  
19  
20  
21  
22  
23  
24  
25  
26  
27  
28  
29  
30  
31  
32  
33  
34  
35  
36  
37  
38  
39  
40  
41  
42  
43  
44  
45  
46  
47  
48  
49  
50  
51  
52  
53  
54  
55  
56  
57  
58  
59  
60

1 **Objective:** Globally, 11 million deaths are attributable to suboptimal diet annually, and  
2 nutrition care has been shown to improve health outcomes. While medically trained clinicians  
3 are well-placed to provide nutrition care, medical education remains insufficient to support  
4 clinicians to deliver nutrition advice as part of routine clinical practice. Competency standards  
5 provide a framework for workforce development and a vehicle for aligning health priorities  
6 with the values of a profession. Albeit, there remains an urgent need to establish consensus on  
7 nutrition competencies for medicine. The aim of this review is to provide a critical synthesis  
8 of published nutrition competencies for medicine internationally.

11  
12 **Design:** Integrative review.

13  
14 **Data sources:** CINAHL, Medline, Embase, Scopus, Web of Science and Global Health were  
15 searched through April 2020.

16  
17 **Eligibility criteria:** We included published nutrition competency frameworks. This search was  
18 complemented by handsearching reference lists of literature deemed relevant.

19  
20 **Data extraction and synthesis:** Data were extracted into summary tables and this matrix was  
21 then used to identify common themes and to compare and analyse the literature. Miller's  
22 pyramid, the Knowledge to Action cycle and the Dreyfus model of skill acquisition were also  
23 used to consider the results of this review.

24  
25 **Results:** Using a pre-determined search strategy, 11 articles were identified. Five common  
26 themes were identified and include 1) clinical practice, 2) health promotion and disease  
27 prevention, 3) communication, 4) working as a team and 5) professional practice. This review  
28 also identified twenty-five nutrition competencies for medicine, the majority of which were  
29 knowledge-based.

30  
31 **Conclusions:** This review recommends vertical integration of nutrition competencies into  
32 existing medical education based on key, cross-cutting themes, and increased opportunities to  
33 engage in relevant, skill-based nutrition training.

1  
2  
3 35 **Keywords:** Competency-based education, Medical education, Nutrition competencies,  
4 Nutrition education  
5 36  
6  
7 37  
8 38

9 39 **STRENGTHS AND LIMITATIONS OF THIS STUDY**  
10 40

- 11 41 • This review offers a critical and timely synthesis of medical nutrition competencies and  
12 a conceptual nutrition competency framework.  
13 42  
14  
15 43 • Themes such as communication and teamwork are not specific to nutrition and  
16 highlight integration of topics across a curriculum.  
17 44  
18 45 • As an integrative review, this framework might be considered a candidate theory for  
19 further review and development.  
20 46  
21  
22 47 • It is recognized that the characteristics of included publications is skewed towards those  
23 published in the USA and that there may be other frameworks internationally. However,  
24 48 it is relevant to note that there are a greater number of medical education facilities in  
25 49 the USA than other countries included such as Australia, New Zealand and Sweden.  
26  
27 50  
28  
29 51 • Research into competence and competency standards is dynamic and frameworks  
30 included are from varied time periods. This may limit application of this work to  
31 52 modern standards.  
32 53  
33  
34 54  
35  
36 55  
37  
38 56  
39 57  
40  
41  
42  
43  
44  
45  
46  
47  
48  
49  
50  
51  
52  
53  
54  
55  
56  
57  
58  
59  
60

## 58 INTRODUCTION

59  
60 Globally, 11 million deaths are attributable to suboptimal diet annually (1). Furthermore, in  
61 2014, more than 1.9 billion adults were overweight, while 462 million were underweight. This  
62 coexistence of undernutrition, along with overweight and obesity, or diet-related chronic  
63 diseases, is referred to as the double burden of malnutrition. This burden is universal and  
64 presents an imperative to improve the nutrition capacity of the health workforce (2). Nutrition  
65 is a powerful tool for the prevention and management of diet-related chronic diseases (1).  
66 Nutrition care refers to any intervention performed by a health professional to improve the  
67 nutrition behaviour and subsequent health status of an individual or community and has been  
68 shown to improve diet-related and health outcomes, often with reduced risk, side effects and  
69 costs when compared with pharmacological interventions (3, 4). For example, when doctors  
70 provide nutrition advice as part of prenatal care, their patients have fewer complications  
71 associated with pregnancy and give birth to healthier children (5). In fact, a recent systematic  
72 analysis reports that improvement of diet could potentially prevent one in every five deaths  
73 globally (1). Furthermore, public health legislation such as the Patient Protection and  
74 Affordable Care Act (Sections 4001(d)(3), 4004(c)(d), 4103(b) and 4206) recognise the  
75 increased need for preventive healthcare interventions, such as nutrition care and authorises  
76 investments in training health professionals (6). Other countries, such as Australia, have not  
77 updated their National Nutrition Policy in over 25 years, while the National Healthy Food and  
78 Drink Policy in New Zealand does not include any reference of training of health professionals  
79 (7, 8). The World Health Organization (WHO) reiterate the need for increased investments in  
80 nutrition for improved health and successful development; the objectives of Universal Health  
81 Coverage cannot be achieved until nutrition actions are integrated across the health care  
82 continuum (9). Therefore, it is essential that clinicians of all backgrounds are cognizant of the  
83 role of nutrition in health and are well-equipped to initiate and support nutrition care as part of  
84 routine clinical practice.

85  
86 Medically trained clinicians are well-placed to initiate and support patient nutrition care (10),  
87 in part due to their regular contact with the individuals for whom they provide care. For  
88 example, 88% of individuals are likely to see a general practitioner (primary care physician)  
89 annually (11). Furthermore, in a hospital setting, an estimated 13% to 69% of hospitalized  
90 individuals are malnourished on admission, and importantly, the prevalence is also high pre-  
91 discharge (12-15). Despite this, a recent systematic review indicates that medical education

1  
2  
3 92 remains insufficient to support clinicians to provide nutrition care as part of routine clinical  
4  
5 93 practice (16). There are a number of organizations calling for improved nutrition education for  
6  
7 94 physicians (17). Competency standards provide a framework for workforce development and  
8  
9 95 are essential for the delivery of safe, effective and patient-centred care (18) and a vehicle for  
10  
11 96 aligning the health priorities of the country with the values of a profession (19). This is  
12  
13 97 particularly relevant, as there is an existing disconnect between medical education and the  
14  
15 98 exigent double burden of malnutrition (16). While there are many approaches to developing a  
16  
17 99 competency framework, authors argue that a preoccupation with discipline-specific tasks  
18  
19 100 overlooks the relevance of cross-cutting attributes such as critical thinking, communication and  
20  
21 101 collaboration which align outcomes across disciplines (18, 20). An integrated approach to  
22  
23 102 competency encompasses the ability to combine and apply practical and reflexive competence  
24  
25 103 in different contexts (20). The use of competency standards in improving medical nutrition  
26  
27 104 education has been previously established and has been shown to increase a clinician's ability  
28  
29 105 to integrate nutrition into patient care (4). Competency in nutrition care is important in the  
30  
31 106 delivery of safe, effective and co-ordinated care (21). However, there is a recognised need to  
32  
33 107 establish consensus on relevant nutrition competencies for medicine (16). The aim of this  
34  
35 108 review is to provide a critical synthesis of published nutrition competencies for medicine  
36  
37 109 internationally. As the UN *Decade of Action on Nutrition 2016-2025* is well underway, this is  
38  
39 110 a timely and important review (22).

## 111 112 **METHODS**

113  
114 This review was an integrative literature review, a “form of research that reviews, critiques and  
115  
116 synthesises representative literature on a topic in an integrated way such that new frameworks  
117  
118 and perspectives on the topic are generated” (23). This methodology is considered rigorous in  
119  
120 this context, and was selected as it allows for a combination of various study designs and data  
121  
122 sources to be included (24, 25). Data, namely, nutrition competencies, were extracted into  
123  
124 summary tables (24) and this matrix was then used to identify common themes and compare,  
125  
126 contrast and analyse the literature (26). Miller's pyramid, the Knowledge to Action cycle and  
127  
128 the Dreyfus model of skill acquisition were also used to consider the results of this review (27-  
129  
130 29). These frameworks acknowledge the complexity of clinical competence and the process of  
131  
132 skill acquisition including the application of knowledge in practice. Furthermore, Miller's  
133  
134 pyramid and the Dreyfus model of skill acquisition have been previously used as a theoretical  
135  
136 framework on which to underpin and improve educational practice in the field of medicine (30-

126 33). These frameworks were therefore utilised as a theoretical blueprint for the organisation of  
 127 nutrition competencies identified in this review. For the purposes of this review, we initially  
 128 defined key concepts based on published definitions and author experience (Table 1).

130 **Table 1. Definitions of key concepts used within this review**

| Concept                             | Definition                                                                                                                                                                                                                                                                                         |
|-------------------------------------|----------------------------------------------------------------------------------------------------------------------------------------------------------------------------------------------------------------------------------------------------------------------------------------------------|
| Competency (or competency standard) | A measure used to describe the idealized capacity of an individual to perform a role or set of tasks (34).                                                                                                                                                                                         |
| Competence                          | Competence can be described as the ability to perform a task with desirable outcomes under varied circumstances. This definition encompasses multiple components such as the habitual and judicious application of knowledge, technical skills, values, clinical reasoning and attitudes (35, 36). |
| Domains of competence               | Competency domains represent organised clusters of competencies which are intended to characterise a central aspect of professional practice in which a professional should be competent (37).                                                                                                     |
| Competency framework                | A competency framework represents a complete collection of competencies required for effective performance (18).                                                                                                                                                                                   |
| Curriculum framework                | A curriculum framework is an organised set of standards or learning objectives that define educational requirements                                                                                                                                                                                |

131

### 132 Search methods

133

134 CINAHL, Medline, Embase, Scopus, Web of Science and Global Health were searched  
 135 through April 2020 to identify published nutrition competency frameworks for medical  
 136 education. The search strategy for each database is provided in Supplementary Materials 1. In  
 137 brief, the key concepts were related to medically trained clinicians, nutrition and diet and  
 138 competency. A research team comprised of all authors in this study, as well as a medical  
 139 librarian, agreed upon terms with the aim of avoiding researcher bias when selecting articles.  
 140 This search was complemented by handsearching reference lists of literature deemed relevant.

141

142 Inclusion criteria for this review were original research publications representing nutrition  
 143 competencies for the continuum of medical education (pre- and post-registration). We included  
 144 interdisciplinary nutrition competency frameworks if the framework stipulated use by the

1  
2  
3 145 medical profession. We excluded frameworks which included only limited reference to  
4  
5 146 nutrition. For example, if a framework was specific to a disease, condition, or specialty rather  
6  
7 147 than only nutrition, the paper was excluded (for example CVD-related frameworks which only  
8  
9 148 included a reference to possible nutrition therapy). We included only current versions of  
10  
11 149 frameworks and excluded editorials, reviews, conference proceedings, opinion papers and  
12  
13 150 interviews. Grey literature was also reviewed by searching the reference lists of literature  
14  
15 151 deemed relevant. The results of the search were not limited by time or language.  
152

### 17 153 **Search outcome**

18  
19 154  
20 155 All database searches were directly imported into the electronic reference management tool  
21  
22 156 Endnote<sup>®</sup> Version X9 (Clarivate Analytics, Philadelphia, USA) and grey literature searches  
23  
24 157 were manually entered by the primary author (BL). After the removal of duplicates using  
25  
26 158 EndNote and manually, one author (BL) independently screened titles and abstracts and  
27  
28 159 selected studies according to the pre-defined inclusion criteria. If the abstract was not  
29  
30 160 sufficient, full texts of remaining papers were screened independently to identify publications  
31  
32 161 for inclusion. Where it was not clear, the primary author engaged in consultative and iterative  
33  
34 162 discussion amongst authors to reach consensus. All authors reached consensus on the included  
35  
36 163 articles.  
36  
37 164

### 38 165 **Data analysis**

39 166  
40  
41 167 Data extraction was completed independently by the primary researcher (BL). Information  
42  
43 168 relating to nutrition competencies was extracted from the retained articles. Information  
44  
45 169 discussing the nutrition-related knowledge, skills or attitudes which published authors believed  
46  
47 170 medical practitioners needed to obtain was categorised as a competency and recorded.  
48  
49 171 Similarly, competency domains or themes represent organised clusters of competencies which  
50  
51 172 are intended to characterise a central aspect of professional practice in which a professional  
52  
53 173 should be competent (37). Information related to competency domains was also included. Data  
54  
55 174 was extracted from each paper into a summary table and series of matrices. The following  
56  
57 175 information was extracted from full-text publications and presented systematically: citation  
58  
59 176 and country, organisation/group, name of the framework, nutrition domains (if stated),  
60  
177 nutrition competencies, learning objectives (if stated) and the level of medical education that

1  
2  
3 178 the framework is intended for (e.g. residency). Findings were read, re-read and articles  
4 compared and contrasted to identify patterns and relationships.  
5 179  
6  
7 180

### 8 181 **Quality appraisal**

10  
11 182 To determine quality and risk of bias for review, the full text of each article was assessed  
12 independently for quality (including risk of bias) by the primary researcher (BL). Given the  
13 183 variation in research methodologies, the Critical Appraisal Skills Programme (CASP) tool was  
14 184 modified for use, as adapted by Halcomb et al. (2016) (CASP, 2019; Halcomb et al., 2016).  
15  
16  
17  
18

### 19 186 **Patient and Public Involvement**

20  
21  
22 187 There is no patient and public involved in the study.  
23  
24

## 25 188 **RESULTS**

26 189

### 28 190 **Search results**

29  
30 191

31 192 The total yield from all databases was 19,709 results. This was reduced to 14,023 results after  
32 the removal of duplicates. Using the exclusion criteria against title and abstract, a total of 56  
33 193 full-text publications were assessed for eligibility, including four publications identified  
34 194 through hand searching of reference lists (Figure 1). It is of interest to note that a considerable  
35 195 number of results were related to the impact of a nutrition course or competency framework on  
36 196 nutrition knowledge, skills and attitudes and therefore not eligible for inclusion. Following full-  
37 197 text review, 11 articles were included in the review. Reasons for exclusion included papers  
38 198 which did not include competencies or a framework (n=18) and competencies that are not  
39 199 specific to nutrition or competencies for a specific aspect of nutrition or health care (for  
40 200 example cardiovascular disease nutrition competencies) (n=15). A list of excluded studies  
41 201 along with reasons for exclusion is provided in Online Supplementary Materials 2.  
42  
43  
44  
45  
46  
47  
48  
49  
50  
51  
52  
53  
54  
55  
56  
57  
58  
59  
60



1  
2  
3  
4  
5  
6  
7  
8  
9  
10  
11  
12  
13  
14  
15  
16  
17  
18  
19  
20  
21  
22  
23  
24  
25  
26  
27  
28  
29  
30  
31  
32  
33  
34  
35  
36  
37  
38  
39  
40  
41  
42  
43  
44  
45  
46  
47  
48  
49  
50  
51  
52  
53  
54  
55  
56  
57  
58  
59  
60

203 **Figure 1. PRISMA flow diagram for identification of articles related to**  
204 **nutrition competencies for medicine.**

For peer review only

## 205 Characteristics of included publications

206  
207 Included studies were published between 1983 and 2019. The majority were peer-reviewed  
208 articles (n=7), with the remaining grey literature comprising of documented frameworks from  
209 expert professional groups (for example, professional associations or accrediting bodies) (n=3)  
210 and a position statement (n=1). Seven studies were from the USA, with one study from each  
211 of Australia and New Zealand, Africa, Sweden and the UK.

## 213 Quality appraisal

214  
215 Descriptions of how the competency frameworks were developed varied in level of detail. It is  
216 important to note that few publications reported the research methods used to develop their  
217 frameworks. Furthermore, few publications acknowledged the limitations or weaknesses of the  
218 processes used to develop the competency frameworks (Question 5). Given these limitations,  
219 articles that did not achieve a 'yes' on all items of the checklist were not excluded from the  
220 review, but the appraisal was taken into consideration in the overall rigour of the present review  
221 (Table 2).

222 **Table 2. Quality appraisal**

| 1. Was the research design appropriate to address the aims of the research?<br>2. Was the data collected in a way that addressed the research issue?<br>3. Was the data analysis sufficiently rigorous?<br>4. Is there a clear statement of the study findings?<br>5. Are there limitations or weaknesses of the study acknowledged?<br>6. Is the research valuable? | Q1      | Q2  | Q3      | Q4  | Q5 | Q6  |
|----------------------------------------------------------------------------------------------------------------------------------------------------------------------------------------------------------------------------------------------------------------------------------------------------------------------------------------------------------------------|---------|-----|---------|-----|----|-----|
| American Academy of Family Physicians, 1998                                                                                                                                                                                                                                                                                                                          | Unclear |     |         | Yes | No | Yes |
| Asp et al., 1995                                                                                                                                                                                                                                                                                                                                                     | Unclear |     |         |     |    | Yes |
| Cuerda et al., 2019                                                                                                                                                                                                                                                                                                                                                  | Yes     | Yes | Unclear | Yes | No | Yes |
| Deen, Karp & Lowell, 1994                                                                                                                                                                                                                                                                                                                                            | Unclear |     |         | Yes | No | Yes |
| Deakin University Strategic Teaching and Learning Grant Steering Committee, 2016                                                                                                                                                                                                                                                                                     | Yes     | Yes | Unclear |     | No | Yes |
| Jhpiego & Save the Children, 2012                                                                                                                                                                                                                                                                                                                                    | Yes     | Yes | Yes     | Yes | No | Yes |
| Lindsley et al., 2017                                                                                                                                                                                                                                                                                                                                                | Yes     | Yes | Yes     | Yes | No | Yes |
| Maillet & Young, 1998                                                                                                                                                                                                                                                                                                                                                | Unclear |     |         | Yes | No | Yes |

|                                                                   |         |     |     |     |     |     |
|-------------------------------------------------------------------|---------|-----|-----|-----|-----|-----|
| Sierpina et al., 2016                                             | Unclear |     |     |     | Yes | Yes |
| Young et al., 1983                                                | Yes     | Yes | Yes | Yes | Yes | Yes |
| ICGN Undergraduate Nutrition Education Implementation Group, 2013 | Unclear |     |     |     |     | Yes |

223

## 224 **Competency domains**

225

226 Five of eleven publications (45%) explicitly used competency domains to categorise or sub-  
 227 divide nutrition competencies. Different methods of classification, or domains, included type  
 228 of competency (such as knowledge, skills and attitudes), domains of human nutrition (including  
 229 concepts of basic nutrition, concepts of applied nutrition and principles of clinical nutrition)  
 230 and sub-division of competencies by nutrition concept (for example, macronutrients and  
 231 micronutrients) or by elements of nutrition care (for example, diagnosis, treatment, prevention)  
 232 (38-43). The most common competency domains were related to the role of nutrition in health  
 233 promotion and disease prevention (n=3), nutrition assessment (n=2) and nutrition management  
 234 (n=2) (39, 40, 42). Competency domains which were identified but only found within one  
 235 framework included those related to patient nutrition counselling skills, nutrition referral,  
 236 nutrition evidence, aspects of critical nutrition care (such as enteral and parenteral nutrition)  
 237 and the impact of disease on nutrition (39, 42).

238

239 The Nutrition Competency Framework (NCF) for medical graduates, developed by the Deakin  
 240 University Strategic Teaching and Learning Grant Steering Committee in Australia, was the  
 241 only framework in this review purposefully mapped to a medical framework, namely, the  
 242 Australian Medical Council (AMC) Graduate Outcome Statements (41, 44). Other frameworks  
 243 in this review, published in the United Kingdom, are endorsed by statutory bodies such as the  
 244 General Medical Council (GMC) and Medical Schools Council (42, 45, 46). Some inter-  
 245 disciplinary nutrition competency frameworks also delineated competencies, such as by  
 246 amount of patient education responsibility or by level of service delivery, to emphasise the  
 247 relevance of nutrition competencies for the wider health workforce (47, 48).

248

249 Despite differences in the taxonomy and language across included nutrition competencies for  
 250 medical education, there are some common underlying themes, which in some contexts may  
 251 be considered “domains” if the papers are summarised. Specifically, five common themes were  
 252 identified across the included nutrition competencies, including clinical practice (all 11

1  
2  
3 253 publications), health promotion and disease prevention (n =8), communication (n=7), working  
4 254 as a team (n=7) and professional practice (n=3). These themes overlap with existing medical  
5 255 competency standards and could be considered cross-cutting.  
6  
7  
8  
9

256

## 10 257 **Competencies**

258

13 259 Twenty-five unique nutrition competencies for medical education were identified in the 11  
14 260 publications. Fifteen of twenty-five nutrition competencies for medicine were classified as  
15 261 knowledge/behaviour-based competencies. For example, ‘Demonstrate knowledge of the  
16 262 functions of essential nutrients’ (39, 43). Seven nutrition competencies were classified as skill-  
17 263 based (for example, ‘Demonstrate ability to select and prescribe dietary strategies in the  
18 264 prevention and treatment of disease’ (39, 41-43, 47-51)) and only four competencies were  
19 265 attitude/value-based (for example, ‘Demonstrate sensitivity to the social, cultural, emotional,  
20 266 and psychological factors that may affect an individual’s nutrition behavior and health status’  
21 267 (39) (Table 3). The most common nutrition competencies (suggested in greater than 50% of  
22 268 articles), were related to 1) skills in nutrition assessment, 2) the ability to prescribe dietary  
23 269 interventions in the prevention and treatment of disease, 3) knowledge of the role of nutrition  
24 270 in health promotion and disease prevention and 4) knowledge of the social and cultural  
25 271 importance of food, including food consumption trends and current nutrition  
26 272 recommendations. Authors less commonly suggested the relevance of demonstrating  
27 273 competency in how disease can affect nutritional status, food-borne illness, an awareness of  
28 274 personal health and nutrition and a commitment to provide evidence-based nutrition care for  
29 275 all patients regardless of health status. Articles published in developed countries were more  
30 276 likely to recommend competencies related to nutritional management of chronic diseases,  
31 277 while studies originating from developing countries included competencies related to  
32 278 emergency medicine and nutritional management for people living with HIV and AIDS (39,  
33 279 48). One paper specified cross-cutting nutrition competencies for all health professionals  
34 280 including community mobilisation and nutrition counselling (48).  
35  
36  
37  
38  
39  
40  
41  
42  
43  
44  
45  
46  
47  
48  
49  
50  
51  
52  
53  
54  
55  
56  
57  
58  
59  
60

**Table 3. Nutrition competencies for medicine**

| Theme and number of publications which include this theme | Domain                                 | Competency                                                                                                                                                                               | Competency Type     | n <sup>a</sup> |
|-----------------------------------------------------------|----------------------------------------|------------------------------------------------------------------------------------------------------------------------------------------------------------------------------------------|---------------------|----------------|
| Clinical Practice<br>n=11 (100%)                          | Nutrition Assessment                   | Demonstrate skills in the assessment of nutritional health including the ability to calculate energy expenditure, nutrition requirements and body composition (21, 38, 39, 41-43, 47-51) | Skill               | 11             |
|                                                           | Nutrition management                   | Demonstrate knowledge of evidence-based dietary strategies for prevention and treatment of disease (21, 38, 39, 41)                                                                      | Knowledge/Behaviour | 4              |
|                                                           |                                        | Demonstrate ability to select and prescribe dietary strategies in the prevention and treatment of disease (39, 41-43, 47-51)                                                             | Skill               | 9              |
|                                                           |                                        | Demonstrate knowledge of possible drug-nutrient interactions and prescribe accordingly (21, 38, 39, 43, 49)                                                                              | Skill               | 5              |
|                                                           |                                        | Demonstrate knowledge of breastfeeding and complementary feeding practices (39, 48)                                                                                                      | Knowledge/Behaviour | 2              |
|                                                           | Nutrition monitoring and evaluation    | Demonstrate the ability to monitor nutrition status and modify dietary recommendations as needed (49, 50)                                                                                | Skill               | 2              |
| Health promotion and disease prevention<br>n=8 (73%)      | Basic sciences as applied to nutrition | Demonstrate knowledge of the basic scientific principles of human nutrition (38, 39, 41)                                                                                                 | Knowledge/Behaviour | 3              |
|                                                           |                                        | Demonstrate knowledge of nutrition applied to different stages of the life cycle (38, 39, 43)                                                                                            | Knowledge/Behaviour | 3              |
|                                                           |                                        | Demonstrate awareness of the nutritional content of food including the major dietary sources of macronutrients and micronutrients (38, 39, 43)                                           | Knowledge/Behaviour | 3              |
|                                                           |                                        | Demonstrate knowledge of the difference between food allergies and food intolerance (38, 39, 43)                                                                                         | Knowledge/Behaviour | 3              |
|                                                           |                                        | Demonstrate knowledge of the functions of essential nutrients (39, 43)                                                                                                                   | Knowledge/Behaviour | 2              |

|                                    |                                                                                                                                                                 |                                                                                                                                                                                    |                                                                                                             |       |
|------------------------------------|-----------------------------------------------------------------------------------------------------------------------------------------------------------------|------------------------------------------------------------------------------------------------------------------------------------------------------------------------------------|-------------------------------------------------------------------------------------------------------------|-------|
|                                    |                                                                                                                                                                 | Demonstrate an understanding of how disease and its management can affect nutritional status (42)                                                                                  | Knowledge/Behaviour                                                                                         | 1     |
|                                    | The role of nutrition in health promotion and disease prevention                                                                                                | Demonstrate an awareness of their own personal health and nutrition (21)                                                                                                           | Attitude/Value                                                                                              | 1     |
|                                    |                                                                                                                                                                 | Demonstrate knowledge of the role of nutrition in health promotion and disease prevention (38, 39, 41-43, 47, 51)                                                                  | Knowledge/Behaviour                                                                                         | 7     |
|                                    |                                                                                                                                                                 | Demonstrate knowledge of the social and cultural importance of food, including awareness of food consumption trends and current nutrition recommendations (21, 38, 39, 41, 43, 51) | Knowledge/Behaviour                                                                                         | 6     |
|                                    |                                                                                                                                                                 | Demonstrate knowledge of nutrition-related causes of mortality and morbidity in the population (21, 38, 51)                                                                        | Knowledge/Behaviour                                                                                         | 3     |
|                                    |                                                                                                                                                                 | Demonstrate knowledge of the principles of public health nutrition, including strategies to reduce the burden of disease (39, 48)                                                  | Knowledge/Behaviour                                                                                         | 2     |
|                                    |                                                                                                                                                                 | Describe food-borne illnesses and outline the process of reporting and investigating outbreaks of these illnesses (39)                                                             | Knowledge/Behaviour                                                                                         | 1     |
| Communication<br>n=7 (64%)         |                                                                                                                                                                 | Nutrition counselling skills                                                                                                                                                       | Demonstrate the ability to effectively provide nutrition education and counselling (21, 38, 39, 43, 47, 50) | Skill |
|                                    | Demonstrate sensitivity to the social, cultural, emotional, and psychological factors that may affect an individual's nutrition behavior and health status (39) |                                                                                                                                                                                    | Attitude/Value                                                                                              | 2     |
| Working as a team<br>n=7 (64%)     | The Multidisciplinary Team Approach to nutrition care                                                                                                           | Demonstrate the ability to work effectively in a multidisciplinary team to deliver nutrition care, including the ability to refer onwards (21, 39, 41, 47, 49)                     | Skill                                                                                                       | 5     |
|                                    |                                                                                                                                                                 | Demonstrate knowledge of the role of other health professionals and community services in the multidisciplinary approach to nutrition care (39, 43, 51)                            | Knowledge/Behaviour                                                                                         | 3     |
| Professional Practice<br>n=3 (27%) | Critical thinking                                                                                                                                               | Demonstrate ability to think critically including the ability to interpret nutrition evidence and apply appropriately in clinical practice (21, 39, 41, 43, 50)                    | Skill                                                                                                       | 3     |
|                                    | Ethics                                                                                                                                                          | Demonstrate the ability to consider and apply principles of ethics related to nutritional management (38, 39, 41)                                                                  | Attitude/Value                                                                                              | 2     |

1  
2  
3  
4  
5  
6  
7  
8  
9  
10  
11  
12  
13  
14  
15  
16  
17  
18  
19  
20  
21  
22  
23  
24  
25  
26  
27  
28  
29  
30  
31  
32  
33  
34  
35  
36  
37  
38  
39  
40  
41  
42  
43  
44  
45  
46

|  |  |                                                                                                                                                                     |                |   |
|--|--|---------------------------------------------------------------------------------------------------------------------------------------------------------------------|----------------|---|
|  |  | Demonstrate a commitment to promote sound nutritional decision-making and appropriate levels of physical activity for all patients regardless of health status (39) | Attitude/Value | 1 |
|--|--|---------------------------------------------------------------------------------------------------------------------------------------------------------------------|----------------|---|

283 <sup>a</sup>Number of articles which include this competency

For peer review only

1  
2  
3 284 **Level of medical education:**  
4

5 285

6 286 All 11 articles specified the level of medical education where there would be an expectation to  
7  
8 287 teach and achieve the nutrition competencies. Five articles included nutrition competencies for  
9  
10 288 undergraduate and graduate (entry-level) medical education. Three of the 11 articles stipulated  
11  
12 289 use by primary care providers and one paper included competencies for family practice  
13  
14 290 residents. The remaining two articles merely specified use by “practicing physicians”.

15 291

16  
17 292 **Summary of concepts**  
18

19 293

20 294 A summary nutrition competency framework, adapted from Hughes et al. (2012) (20) and  
21  
22 295 informed by the Dreyfus model of skill acquisition, the framework for clinical competency  
23  
24 296 assessment outlined in Miller (1990) and the Knowledge to Action Cycle as described by  
25  
26 297 Graham and colleagues (2006) (20, 27, 28, 52, 53) is presented based on the competencies in  
27  
28 298 the literature (Figure 2 or Table 4). This provides a preliminary model for a nutrition  
29  
30 299 competency framework for medicine, which can be further investigated in subsequent research.  
31  
32 300 In this framework, categories of competency units are delineated into four different tiers to  
33  
34 301 represent hierarchies of competency acquisition and assessment. At the base of the matrix are  
35  
36 302 enabling and critical competencies (know and know how) which underpin higher level nutrition  
37  
38 303 practice behaviours. At a foundational level, the Dunning-Kruger Effect indicates that  
39  
40 304 individuals may be ‘unconsciously unskilled’ (54). The proposed framework also includes  
41  
42 305 common, cross-cutting attributes identified in this review. Cross-cutting competencies  
43  
44 306 delineate the professionalism required for effective, collaborative and safe practice and  
45  
46 307 improve the transferability of the competency framework across health disciplines (20). Top-  
47  
48 308 level practice competencies are defined by Hughes et al. (2012) as “higher order composite  
49  
50 309 behaviours” which are required to “perform complex practice behaviours” which underpin core  
51  
52 310 functions of the profession (20). Practice competencies involve behavioural performance  
53  
54 311 (showing how and doing) and it is hoped the inclusion of these competencies bridges the gap  
55  
56 312 between cognitive competencies and translation in practice (20).  
57  
58  
59  
60



Insert Figure 2 here OR

Table 4. Proposed conceptual nutrition competency framework for medicine

|                                  |                                                                                                                                     |                                                                                                      |                                                                                                                     |                                                                                                                   |                                                                                                                                                  |                                                                                                                                  |
|----------------------------------|-------------------------------------------------------------------------------------------------------------------------------------|------------------------------------------------------------------------------------------------------|---------------------------------------------------------------------------------------------------------------------|-------------------------------------------------------------------------------------------------------------------|--------------------------------------------------------------------------------------------------------------------------------------------------|----------------------------------------------------------------------------------------------------------------------------------|
| <b>PRACTICE (DOES)</b>           | Assessment of nutritional health including the ability to calculate energy expenditure, nutrition requirements and body composition | Select and prescribe dietary strategies in the prevention and treatment of disease                   | Monitor nutrition status and modify dietary recommendations as needed                                               | Effectively provide nutrition education and counselling                                                           | Work effectively in a multidisciplinary team to deliver nutrition care, including the ability to refer onwards                                   |                                                                                                                                  |
| <b>CROSS-CUTTING (SHOWS HOW)</b> | <i>Clinical Practice</i>                                                                                                            | <i>Health Promotion and Disease Prevention</i>                                                       | <i>Communication</i>                                                                                                | <i>Working as a Team</i>                                                                                          | <i>Professional Practice</i>                                                                                                                     |                                                                                                                                  |
| <b>CRITICAL (KNOWS HOW)</b>      | Evidence-based dietary strategies for the prevention and treatment of disease                                                       | Knowledge of possible drug-nutrient interactions and prescribe accordingly                           | Think critically including the ability to interpret nutrition evidence and apply appropriately in clinical practice | Consider and apply principles of ethics related to nutritional management                                         | Commitment to promote sound nutritional decision-making and appropriate levels of physical activity for all patients regardless of health status | Awareness of their own personal health and nutrition                                                                             |
| <b>ENABLING (KNOWS)</b>          | Knowledge of the functions of essential nutrients                                                                                   | Nutritional content of food including the major dietary sources of macronutrients and micronutrients | Nutrition applied to different stages of the life cycle                                                             | Describe food-borne illnesses and outline the process of reporting and investigating outbreaks of these illnesses | An understanding of how disease and its management can affect nutritional status                                                                 | Awareness of the social and cultural importance of food, including food consumption trends and current nutrition recommendations |
|                                  | Basic scientific principles of human nutrition                                                                                      | The role of nutrition in health promotion and disease prevention                                     | Breastfeeding and complementary feeding practices                                                                   | Food allergies and intolerances                                                                                   | Nutrition-related causes of mortality and morbidity in the population                                                                            | Public health nutrition, including strategies to reduce the burden of disease                                                    |

1  
2  
3 319 **DISCUSSION**  
4

5 320

6 321 There is currently no consensus on nutrition competencies relevant for medical education. This  
7  
8 322 review provides a critical synthesis of published nutrition competencies for medical education  
9  
10 323 and practice internationally. This review identified five common themes across nutrition  
11  
12 324 competencies which add to existing literature related to medical nutrition education. Twenty-  
13  
14 325 five unique nutrition competencies for medical education were identified from 11 articles.  
15

16 326

17 327 The five common themes across nutrition competencies for medicine, were clinical practice,  
18  
19 328 health promotion and disease prevention, communication, working as a team and professional  
20  
21 329 practice. The latter three, while referring to nutrition, highlighting generic skills that are  
22  
23 330 required to be applied across all aspects of medical care. This is congruent with core  
24  
25 331 competencies and individual roles in existing medical frameworks, such as the CanMEDS  
26  
27 332 Physician Competency Framework, the Accreditation Council for Graduate Medical Education  
28  
29 333 (ACGME) core competencies, the General Medical Council (GMC) Outcomes for graduates,  
30  
31 334 the Australian Medical Council Limited (AMC) Graduate Outcome Statements and the Royal  
32  
33 335 Australasian College of Physicians (RACP) Professional Practice Framework (44, 55-58). For  
34  
35 336 example, the CanMEDS Physician Competency Framework, one of the most globally  
36  
37 337 recognized health care profession competency frameworks articulates a number of intrinsic  
38  
39 338 roles which reflect key themes identified in this review, such as the Communicator,  
40  
41 339 Collaborator and Health Advocate.

42 340

43 341 Generic themes such as those identified in this review can provide leverage in educational  
44  
45 342 reform, by aligning incentives to facilitate synergy across health care professions (59). For  
46  
47 343 example, a multidisciplinary team (MDT – identified as “working as a team” in this review)  
48  
49 344 approach to nutrition care has been shown to provide high quality, cost-effective nutrition  
50  
51 345 outcomes (60, 61). However, there is a disconnect between the university education  
52  
53 346 environment, which is generally not interdisciplinary, and the practice environment, which  
54  
55 347 increasingly requires collaborative skills (59). Furthermore, communication and collaboration  
56  
57 348 are key aspects of the iterative process of knowledge translation, including the ability to  
58  
59 349 exchange information to overcome barriers to implementation. Communication and  
60  
350 collaboration (teamwork) were also common themes identified by this review. Optimized  
351 knowledge translation has been shown to improve the quality of evidence-based nutrition care  
352 and strengthen the health care system, as summarised by the Knowledge to Action Cycle (53).

1  
2  
3 353 Not only does this cross-over between medical and nutrition competencies highlight the lateral  
4  
5 354 nature of nutrition as a cognate scientific discipline, but it also provides merit to opportunity  
6  
7 355 for the vertical integration of nutrition competencies into existing medical education. Rather  
8  
9 356 than an isolated concept with a distinct set of competencies, existing medical spiral curricula  
10  
11 357 could be enhanced by applying existing medical competencies to a nutrition context. Deen  
12  
13 358 (2006) illustrated this by successfully mapping the Curriculum Committee of the National  
14  
15 359 Academic Award (NAA) learning objectives to the ACGME competencies for competency-  
16  
17 360 based resident evaluation (62). This reiterates the relevance of nutrition as a core facet of  
18  
19 361 clinical practice without necessarily adding time to curricula. Namely, vertical integration of  
20  
21 362 nutrition competencies into medical education is particularly relevant in a crowded curriculum,  
22  
23 363 and is a key element of a successful integrated medical nutrition curriculum, shown to improve  
24  
25 364 medical students' perceptions of nutrition as part of total patient care (63, 64). However, there  
26  
27 365 is a need to first build consensus on nutrition competencies for medical education  
28  
29 366

30  
31 367 The majority of the medical nutrition competencies identified in this review were knowledge-  
32  
33 368 based, while less than 30% of nutrition competencies were skill-based and only four  
34  
35 369 competencies were attitude-based (Table 3). While knowledge-based (enabling) competencies  
36  
37 370 are essential to interpret new concepts in nutrition and underpin higher order (practice)  
38  
39 371 competencies, skill-based competencies are relevant to clinical practice, which requires the  
40  
41 372 complex and judicious application of knowledge, technical skills, clinical reasoning, values and  
42  
43 373 reflection under varied circumstances (36). This is in line with the experience of medical  
44  
45 374 graduates and practising physicians, who do not feel comfortable or adequately prepared to  
46  
47 375 provide nutrition counselling to their patients (10, 16, 65, 66). In order to overcome these  
48  
49 376 barriers, Adams et al., (2010) and Lindsley et al., (2017) emphasise the need for "skill-centred  
50  
51 377 nutrition training" (67). A realist synthesis of educational interventions to improve nutrition  
52  
53 378 care competencies and delivery by doctors and other healthcare professionals, reports that  
54  
55 379 educational interventions which led to improvements in the delivery of nutrition care focused  
56  
57 380 on skills and attitudes rather than just knowledge (68). Skill-based nutrition training has been  
58  
59 381 shown to improve medical students' nutrition knowledge and confidence in lifestyle  
60  
61 382 counselling (69).

62  
63 383  
64  
65 384 While competency frameworks provide an architectural blueprint for constructing educational  
66  
67 385 programmes, the centrality of valid assessment methods to support the life-long journey of  
68  
69 386 competency development cannot be overlooked (19). Increasing the weighting of a topic in

1  
2  
3 387 assessment has been shown to enhance medical students' reported motivation to learn about  
4  
5 388 the topic (70). Furthermore, regular and repeated assessment can improve knowledge retention  
6  
7 389 in medical students (71, 72). This is particularly important given that despite initial high interest  
8  
9 390 in nutrition, interest in and perception of the importance of nutrition may decline during time  
10  
11 391 in medical school (73). Earlier research highlights the effectiveness of the Objective Structured  
12  
13 392 Clinical Exam (OSCE) in evaluating the ability to synthesise and translate knowledge to  
14  
15 393 to clinical practice (64). Miller (1990) also emphasises the role of skill-based assessment methods  
16  
17 394 such as the OSCE in the appraisal of technical and clinical competence (74). Problem-based  
18  
19 395 learning tutorials, culinary skills training and clinical case presentations have also been shown  
20  
21 396 to promote active learning and lead to significant changes in participants' knowledge, personal  
22  
23 397 health habits, confidence to provide dietary counselling and ability to nutritionally manage  
24  
25 398 malnutrition (68). A combination of innovative learning strategies is required to support the  
26  
27 399 development of clinical competence. Educational strategies and assessment methods which  
28  
29 400 improve nutrition care competencies, such as problem-based learning and the OSCE, are  
30  
31 401 already widely used methods in medical education (75). Therefore, the application of existing  
32  
33 402 learning to a nutrition context, such as a nutrition OSCE, may lead to improvements in  
34  
35 403 competency to provide nutrition care in future practice. There is currently no consensus on the  
36  
37 404 required nutrition competencies for medicine, which presents a further barrier to the integration  
38  
39 405 of nutrition in medical education (16). The nutrition competencies identified in this review  
40  
41 406 provide a potential benchmark for the nutrition knowledge, skills and attitudes to be included  
42  
43 407 in curricula (Table 3). However, given the lack of consensus on relevant nutrition  
44  
45 408 competencies, commitment of individual institutions to compulsory nutrition education is  
46  
47 409 insufficient and regulation is required. The 2019 report 'Doctoring Our Diet' recommends  
48  
49 410 policy levers to include nutrition in U.S. medical training, such as government investment to  
50  
51 411 provide financial incentive for the inclusion of nutrition in medical training, amending  
52  
53 412 accreditation standards to mandate requirements for nutrition education, increasing  
54  
55 413 representation of nutrition in step and board-examinations and compulsory nutrition training  
56  
57 414 in continuing medical education (17).

415

## 416 **STRENGTHS AND LIMITATIONS**

417

418 This review offers a critical and timely synthesis of medical nutrition competencies and a  
419 conceptual nutrition competency framework. As an integrative review, this framework might  
420 be considered a candidate theory for further review and development. However, this review

1  
2  
3 421 also needs to be considered in the context of its limitations. While the search strategy used  
4  
5 422 included terms previously used to identify competency frameworks, others may exist and  
6  
7 423 therefore some studies may not have been captured. We acknowledge there may be some bias  
8  
9 424 in the conduct of the review in that only one author was involved in extraction of data. It is  
10  
11 425 recognized that the characteristics of included publications is skewed towards those published  
12  
13 426 in the USA (and English language) and that this may have biased our findings. However, it is  
14  
15 427 relevant to note that there are a greater number of medical education facilities in the USA than  
16  
17 428 other countries included such as Australia, New Zealand and Sweden (76). The majority (6/7)  
18  
19 429 of the included studies were published in developed countries; this may have implications on  
20  
21 430 the generalisability of the proposed nutrition competency framework. We used the Dreyfus  
22  
23 431 model of skill acquisition, Miller's hierarchy for the assessment of clinical competence and the  
24  
25 432 Knowledge to Action Cycle (20, 27, 28, 52, 53) to frame this work, and acknowledge that other  
26  
27 433 frameworks may also be useful in this context. For example, the frameworks used may not  
28  
29 434 consider elements of cognitive aptitude such as diagnostic reasoning.  
30  
31 435

## 32 436 **CONCLUSION**

33 437  
34 438 This review identified five common, cross-cutting themes across nutrition competencies for  
35  
36 439 medicine: 1) clinical practice, 2) health promotion and disease prevention, 3) communication,  
37  
38 440 4) working as a team and 5) professional practice. This review also identified twenty-five  
39  
40 441 nutrition competencies for medicine, the majority of which were knowledge-based. The most  
41  
42 442 common nutrition competencies were related to nutrition assessment, dietary interventions for  
43  
44 443 the prevention and treatment of disease, the role of nutrition in health promotion and disease  
45  
46 444 prevention and knowledge of the social and cultural importance of food. This review  
47  
48 445 recommends vertical integration of nutrition competencies into existing medical education  
49  
50 446 based on key, cross-cutting themes, and increased opportunities to engage in relevant, skill-  
51  
52 447 based nutrition training.  
53  
54  
55  
56  
57  
58  
59  
60

1  
2  
3 **Acknowledgements:** We would like to thank Isla Kuhn, Medical Librarian at the University  
4 of Cambridge for her invaluable input to the search strategy.  
5  
6  
7

8 **Contributors:** BL, EB, KM and SR contributed to the design of the review. BL did the  
9 literature search, performed data analysis and drafted the manuscript. EB contributed to data  
10 extraction. All authors contributed to revision of the manuscript and approval of the final  
11 manuscript. The corresponding author attests that all listed authors meet authorship criteria and  
12 that no others meeting the criteria have been omitted. Patients and/or the public were not  
13 involved in this study.  
14  
15  
16  
17  
18  
19

20 **Funding:** This research received no specific grant from any funding agency in the public,  
21 commercial or not-for-profit sectors.  
22  
23  
24

25 **Competing interests:** None declared.  
26  
27  
28

29 **Patient consent for publication:** Not required.  
30  
31

32 **Data availability statement:** There are no data in this work.  
33  
34

35 **Figure 2. Proposed conceptual nutrition competency framework for medicine**  
36  
37  
38  
39  
40  
41  
42  
43  
44  
45  
46  
47  
48  
49  
50  
51  
52  
53  
54  
55  
56  
57  
58  
59  
60

## REFERENCES

1. GBD 2017 Diet Collaborators. Health effects of dietary risks in 195 countries, 1990-2017: a systematic analysis for the Global Burden of Disease Study 2017. *Lancet* 2019;11(393):1958-72. doi: 10.1016/S0140-6736(19)30041-8
2. World Health Organization. The double burden of malnutrition: policy brief. 2017.
3. Gwynn J, Sin K, Searle T, et al. Effect of nutrition interventions on diet-related and health outcomes of Aboriginal and Torres Strait Islander Australians: A systematic review. *BMJ Open* 2019;9(4) doi:
4. Kris-Etherton PM, Akabas SR, Douglas P, et al. Nutrition competencies in health professionals' education and training: a new paradigm. *Advances In Nutrition (Bethesda, Md)* 2015;6(1):83-7. doi: 10.3945/an.114.006734
5. Kominarek M, Rajan P. Nutrition recommendations in pregnancy and lactation. *Med Clin* 2016;100(6):1199-215. doi:
6. Patient and Affordable Care Act, HR 3590, 111th Congress, Sec. 1001. 2010. Available from: <http://www.gpo.gov/fdsys/pkg/BILLS-111hr3590enr/pdf/BILLS-111hr3590enr.pdf> accessed 8 February 2020.
7. Australian Government. Food and Nutrition policy. Canberra, 1992.
8. Ministry of Health. National Healthy Food and Drink Policy (2nd ed). Wellington, 2019.
9. World Health Organization. Mobilising ambitious and impactful commitments for mainstreaming nutrition in health systems: nutrition in universal health coverage - global nutrition summit. Geneva, 2020.
10. Ball LE, Hughes RM, Leveritt MD. Nutrition in general practice: role and workforce preparation expectations of medical educators. *Australian Journal Of Primary Health* 2010;16(4):304-10. doi: 10.1071/PY10014
11. The Royal Australian College of General Practitioners. General Practice: Health of the Nation 2018. East Melbourne, Victoria, 2018.
12. O'Flynn J, Peake H, Hickson M, et al. The prevalence of malnutrition in hospitals can be reduced: Results from three consecutive cross-sectional studies. *Clin Nutr* 2005;24(6):1078-88. doi:
13. Singh H, Watt K, Veitch R, et al. Malnutrition is prevalent in hospitalized medical patients: Are housestaff identifying the malnourished patient? *Nutrition* 2006;22(4):350-4. doi:
14. Kang MC KJ, Ryu SW, Moon JY, Park JH, Park JK, Park JH, Baik HW, Seo JM, Son MW, Song GA, Shin DW, Shin YM, Ahn HY, Yang HK, Yu HC, Yun IJ, Lee JG, Lee JM, Lee JH, Lee TH, Yim H, Jeon HJ, Jung K, Jung MR, Jeong CY, Lim HS, Hong SK; Korean Society for Parenteral and Enteral Nutrition (KSPEN) Clinical Research Groups. Prevalence of Malnutrition in Hospitalized Patients: a Multicenter Cross-sectional Study. *J Korean Med Sci* 2018;33(2):e10. doi: 10.3346/jkms.2018.33.e10
15. van Vliet I, Gomes-Neto A, de Jong M, et al. High prevalence of malnutrition both on hospital admission and predischage. *Nutrition* 2020;77:110814. doi: 10.1016/j.nut.2020.110814
16. Crowley J, Ball L, Hiddink G. Nutrition in medical education: a systematic review. *Lancet Planet Health* 2019;3(9):E379-E89. doi:
17. Food Law and Policy Clinic. Harvard Law School. Doctoring our diet: Policy tool to include nutrition in U.S. medical training. 2019.

18. Hughes R. Competencies for effective public health nutrition practice: a developing consensus. *Public Health Nutrition* 2004;7(5):683-91. doi: 10.1079/phn2003574
19. Gruppen L, Mangrulkar R, Kolars J. The promise of competency-based education in the health professions for improving global health. *Hum Resour Health* 2012;10(43) doi:
20. Hughes R, Shrimpton R, Recine E, et al. Empowering our profession [Commentary] *World Nutr J* 2012;3(2):33-54. doi:
21. Sierpina VS, Welch K, Devries S, et al. What Competencies Should Medical Students Attain in Nutritional Medicine? *Explore (New York, NY)* 2016;12(2):146-7. doi: 10.1016/j.explore.2015.12.012
22. United Nations Decade of Action on Nutrition 2016-2025: United Nations. 2020. Available from: <https://www.un.org/nutrition/about> accessed 8 May 2020.
23. Torraco RJ. Writing integrative literature reviews: Guidelines and examples. *Hum Resour Manag Rev* 2005;4:356-67. doi:
24. Whittemore R, Knafl K. The integrative review: Updated methodology. *J Adv Nurs* 2005;52(2):546-53. doi: <https://doi.org/10.1111/j.1365-2648.2005.03621.x>
25. Halcomb E, Stephens M, Bryce J, et al. Nursing competency standards in primary health care: an integrative review. *J Clin Nurs* 2016;25:1193-205. doi: 10.1111/jocn.13224
26. Whittemore R, Knafl, K. The integrative review: Updated methodology. *Journal of advanced nursing* 2005;52(5):546-53. doi:
27. Miller GE. The assessment of clinical skills/competence/performance. *Acad Med* 1990;65(9):s63-s7. doi:
28. Benner P. Use of the Dreyfus model of skill acquisition to describe and interpret skill acquisition and clinical judgement in nursing practice and education. *Bull Sci Technol Soc* 2005;24:188-99. doi:
29. Graham I, Tetroe J, Pearson A. *Turning Knowledge into Action: Practical Guidance on How to Do Integrated Knowledge Translation Research*. Lippincott Williams & Wilkins 2014.
30. Field A. Understanding the Dreyfus model of skill acquisition to improve ultrasound training for obstetrics and gynaecology trainees. *Ultrasound* 2014;22(2):118-22. doi: 10.1177/1742271X14521125
31. Mitchell E, Arora S. How educational theory can inform the training and practice of vascular surgeons. *Journal of Vascular Surgery* 2012;56(2):530-7. doi: <https://doi.org/10.1016/j.jvs.2012.01.065>
32. Sadideen H, Plonczak A, Saadeddin M, et al. How Educational Theory Can Inform the Training and Practice of Plastic Surgeons. *Plast Reconstr Surg Glob Open* 2018;6(12) doi: 10.1097/GOX.0000000000002042
33. Carr S. Assessing clinical competency in medical senior house officers: how and why should we do it? *Postgrad Med J* 2004;80:63-6. doi: 10.1136/pmj.2003.011718
34. Verma S, Paterson M, Medves J. Core competencies for health care professionals: What medicine, nursing, occupational therapy, and physiotherapy share. *J Allied Health* 2006;35:109-15. doi:
35. Epstein RM, Hundert EM. Defining and assessing professional competence. *JAMA* 2002;287(2):226-35. doi:
36. Benner P. From novice to expert. *Am J Nurs* 1982:402-7. doi:
37. Frankson R, Hueston W, Christian K, et al. One Health Core Competency Domains. *Front Public Health* 2016;4 doi: 10.3389/fpubh.2016.00192



- 1
- 2
- 3
- 4 38. Cuerda C, Muscaritoli M, Donini LM, et al. Nutrition education in medical schools
- 5 (NEMS). An ESPEN position paper. *Clinical Nutrition* 2019;38(3):969-74. doi:
- 6 10.1016/j.clnu.2019.02.001
- 7 39. Lindsley JE, Abali EE, Bikman BT, et al. What Nutrition-Related Knowledge, Skills, and
- 8 Attitudes Should Medical Students Develop? *Medical Science Educator* 2017;27(4):579-83.
- 9 doi: 10.1007/s40670-017-0476-3
- 10 40. Akner G, Andersson H, Forsum E, et al. A national document on clinical nutrition.
- 11 Developmental work for improvement of medical education. *Lakartidningen*
- 12 1997;94(18):1731-9. doi:
- 13 41. Deakin University Strategic Teaching and Learning Grant Steering Committee.
- 14 Extended Nutrition Competency Framework (NCF). Committee DUSTaLGS, 2016.
- 15 42. ICGN Undergraduate Nutrition Education Implementation Group. ICGN
- 16 Undergraduate Curriculum in Nutrition. Group IUNEI, 2013.
- 17 43. Recommended core educational guidelines on nutrition for family practice residents.
- 18 *American Family Physician* 1989;40(1):265-6. doi:
- 19 44. Australian Medical Council Limited. Accreditation Standards for Primary Medical
- 20 Education Providers and their Program of Study and Graduate Outcome Statements. Limited
- 21 AMC, 2012.
- 22 45. General Medical Council: General Medical Council. 2020. Available from:
- 23 <https://www.gmc-uk.org/> accessed.
- 24 46. Medical Schools Council: Home: Medical Schools Council (MSC). 2020. Available
- 25 from: <https://www.medschools.ac.uk/> accessed 3 June 2020.
- 26 47. Maillet JO, Young EA. ADA reports. Position of The American Dietetic Association:
- 27 nutrition education for health care professionals. *Journal of the American Dietetic*
- 28 *Association* 1998;98(3):343-6. doi:
- 29 48. Jhpiego & Save the Children. Nutrition core competencies for health science cadres
- 30 and undergraduate nutritionists in Ethiopia. 2012.
- 31 49. Young EA, Weser E, McBride HM, et al. Development of core competencies in clinical
- 32 nutrition. *The American Journal Of Clinical Nutrition* 1983;38(5):800-10. doi:
- 33 50. Deen D, Jr., Karp R, Lowell B. A new approach to nutrition education for primary care
- 34 physicians in the United States. *Journal Of General Internal Medicine* 1994;9(7):407-8. doi:
- 35 51. Asp NG, Akner G, Forsum E, et al. Nutrition in Swedish medical education. *Nordisk*
- 36 *medicin* 1995;110(11):292-3. doi:
- 37 52. Dreyfus S, Dreyfus, H. A five-stage model of the mental activities involved in directed
- 38 skill acquisition and clinical judgement in nursing practice and education. University of
- 39 California: Berkeley 1980.
- 40 53. Laur C, Keller, H. Implementing best practice in hospital multidisciplinary nutritional
- 41 care: an example of using the knowledge-to-action process for a research program. *Journal*
- 42 *of Multidisciplinary Healthcare* 2015;8:463-72. doi:
- 43 54. Dunning D. Chapter Five - The Dunning-Kruger Effect: On Being Ignorant of One's
- 44 Own Ignorance. *Adv Exp Soc Psychol* 2011;44:247-96. doi:
- 45 55. Royal College of Physicians and Surgeons of Canada. CanMEDS 2015 Physician
- 46 Competency Framework. Ottawa, 2015.
- 47 56. Accreditation Council for Graduate Medical Education (ACGME). ACGME Outcome
- 48 Project. 2007.
- 49
- 50
- 51
- 52
- 53
- 54
- 55
- 56
- 57
- 58
- 59
- 60

- 1
- 2
- 3
- 4 57. Professional Practice Framework: Royal Australasian College of Physicians (RACP).  
5 2020. Available from: [https://www.racp.edu.au/trainees/curricula/professional-practice-  
7 framework](https://www.racp.edu.au/trainees/curricula/professional-practice-<br/>6 framework) accessed 10 June 2020.
- 8 58. General Medical Council (GMC). Outcomes for graduates 2018. London, UK, 2018.
- 9 59. Institute of Medicine (IOM). Health Professions Education: A bridge to quality. Press  
10 NA, 2003.
- 11 60. Butcher M. P1.29: The impact of a nutrition multidisciplinary team. *Transplantation*  
12 2019;103(7S2):S73-S4. doi: doi: 10.1097/01.tp.0000575832.73538.eb
- 13 61. Rasmussen N, Belqaid K, Lugnet K, et al. Effectiveness of multidisciplinary nutritional  
14 support in older hospitalised patients: A systematic review and meta-analyses. *Clin Nutr*  
15 *ESPEN* 2018;27:P44-52. doi:  
16
- 17 62. Deen D. How can nutrition education contribute to competency-based resident  
18 evaluation? *Am J Clin Nutr* 2006;976S-80S. doi:  
19
- 20 63. Krebs N, Primak L. Comprehensive integration of nutrition into medical training. *Am J*  
21 *Clin Nutr* 2006;945S-50S. doi:  
22
- 23 64. Taren D, Thomson C, Koff N, et al. Effect of an integrated nutrition curriculum on  
24 medical education, student clinical performance, and student perception of medical-  
25 nutrition training. *Am J Clin Nutr* 2001;73(6):1107-12. doi:  
26 <https://doi.org/10.1093/ajcn/73.6.1107>
- 27 65. Levine B, Wigren M, Chapman D, et al. A national survey of attitudes and practices of  
28 primary-care physicians relating to nutrition: strategies for enhancing the use of clinical  
29 nutrition in medical practice. *Am J Clin Nutr* 1993;57:115-9. doi:  
30
- 31 66. Soltesz K, Price J, Johnson L, et al. Family physicians' views of the preventive services  
32 task force recommendations regarding nutritional counseling. *Arch Fam Med* 1995;4:589-  
33 93. doi:  
34
- 35 67. Adams KM, Kohlmeier M, Powell M, et al. Nutrition in medicine: nutrition education  
36 for medical students and residents. *Nutrition in clinical practice : official publication of the*  
37 *American Society for Parenteral and Enteral Nutrition* 2010;25(5):471-80. doi:  
38
- 39 68. Mogre V, Scherpbier, A.J.J.A., Stevens, F., Aryee, P., Cherry, M.G. & Dornan, T. Realist  
40 synthesis of educational interventions to improve nutrition care competencies and delivery  
41 by doctors and other healthcare professionals. *BMJ Open* 2016;6:e010084. doi:  
42
- 43 69. Pang B, Memel Z, Diamant C, et al. Culinary medicine and community partnership:  
44 hands-on culinary skills training to empower medical students to provide patient-centered  
45 nutrition education. *Med Educ Online* 2019;24(1) doi:  
46
- 47 70. Wormald BW, Schoeman S, Somasunderam A, et al. Assessment Drives Learning: An  
48 Unavoidable Truth? *Anat Sci Educ* 2009;2(5):199-204. doi: DOI: 10.1002/ase.102
- 49 71. Larsen D, Butler A, Roediger H. Test-enhanced learning in medical education. *Med*  
50 *Educ* 2008;42:959-66. doi:  
51
- 52 72. Kromann C, Jensen M, Ringsted C. The effect of testing on skills learning. *Med Educ*  
53 2009;43:21-7. doi:  
54
- 55 73. Morgan SL, Weinsier RL, Boker JR, et al. A comparison of nutrition knowledge of  
56 freshmen and senior medical students: a collaborative study of southeastern medical  
57 schools. *Journal Of The American College Of Nutrition* 1988;7(3):193-7. doi:  
58
- 59 74. Miller G. The assessment of clinical skills/competence/performance. *Academic*  
60 *Medicine* 1990;65(9):s63-7. doi:

1  
2  
3 75. Witheridge A, Ferns, G. & Scott-Smith, W. Revisiting Miller's pyramid in medical  
4 education: the gap between traditional assessment and diagnostic reasoning. Int J Med  
5 Educ 2019;10:191-2. doi: doi: 10.5116/ijme.5d9b.0c37  
6

7 76. World Directory of Medical Schools: World Federation for Medical Education (WFME  
8 ) & Foundation for Advancement of International Medical Education and Research  
9 (FAIMER). 2020. Available from: <https://search.wdoms.org/> accessed September 1 2020.  
10  
11  
12  
13  
14  
15  
16  
17  
18  
19  
20  
21  
22  
23  
24  
25  
26  
27  
28  
29  
30  
31  
32  
33  
34  
35  
36  
37  
38  
39  
40  
41  
42  
43  
44  
45  
46  
47  
48  
49  
50  
51  
52  
53  
54  
55  
56  
57  
58  
59  
60

For peer review only

**Figure 1. PRISMA flow diagram for identification of articles related to nutrition competencies for medicine.**



Figure 2. Proposed conceptual nutrition competency framework for medicine

|                                  |                                                                            |                                                                                   |                                                                     |                                                                                       |                                                                             |                                                                                           |
|----------------------------------|----------------------------------------------------------------------------|-----------------------------------------------------------------------------------|---------------------------------------------------------------------|---------------------------------------------------------------------------------------|-----------------------------------------------------------------------------|-------------------------------------------------------------------------------------------|
| <b>PRACTICE (DOES)</b>           | Assessment: energy expenditure, nutritional requirements, body composition | Select/prescribe dietary strategies: prevention and treatment                     | Monitor nutrition status/modify dietary recommendations             | Effectively provide nutrition education and counselling                               | Work effectively in a multidisciplinary team/refer as required              |                                                                                           |
| <b>CROSS-CUTTING (SHOWS HOW)</b> | <i>Clinical Practice</i>                                                   | <i>Health Promotion and Disease Prevention</i>                                    | <i>Communication</i>                                                | <i>Working as a Team</i>                                                              | <i>Professional Practice</i>                                                |                                                                                           |
| <b>CRITICAL (KNOWS HOW)</b>      | Evidence-based dietary strategies: prevention and treatment                | Drug-nutrient interactions and prescribe accordingly                              | Think critically: interpret nutrition evidence, apply appropriately | Apply principles of ethics related to nutritional management                          | Promote sound nutritional decision-making and appropriate physical activity | Awareness of personal health and nutrition                                                |
| <b>ENABLING (KNOWS)</b>          | Knowledge of functions of essential nutrients                              | Nutritional content of food including the dietary sources of macro/micronutrients | Nutrition applied to the life cycle                                 | Describe food-borne illnesses; outline process of reporting & investigating outbreaks | Understanding of how disease/management affects nutritional status          | Awareness of social & cultural importance of food; consumption trends; dietary guidelines |
|                                  | Basic scientific principles of human nutrition                             | Role of nutrition in health promotion/ disease prevention                         | Breastfeeding and complementary feeding practices                   | Food allergies and intolerances                                                       | Nutrition-related causes of mortality and morbidity                         | Public health nutrition, including strategies to reduce burden of disease                 |

## Supplementary Materials 1 – Search Strategy

| Data base                         | Search terms                                                                                                                                                                                                                                                                                                                                                                                                                                                                                                                                                                                                                                                                                                                                                                                                                                                                                                                                                                                                                                                                                                              | Results |
|-----------------------------------|---------------------------------------------------------------------------------------------------------------------------------------------------------------------------------------------------------------------------------------------------------------------------------------------------------------------------------------------------------------------------------------------------------------------------------------------------------------------------------------------------------------------------------------------------------------------------------------------------------------------------------------------------------------------------------------------------------------------------------------------------------------------------------------------------------------------------------------------------------------------------------------------------------------------------------------------------------------------------------------------------------------------------------------------------------------------------------------------------------------------------|---------|
| <b>CINAHL Plus with Full Text</b> | (((“doctor*” OR (“physicians+”)) OR (“medical student*”) OR (“students, medical”) OR (“(medic* OR doctor* OR clinical*) N2 student*”) OR (“general practitioner” OR family doctor* OR family physician*”) OR (“physicians, family”) OR (“interns and residents”) OR “medical N3 (specialist* OR intern* OR resident*”)” OR (specialist registrar* OR (clinical specialist*) OR (“education, medical+”) OR “medical education” OR (“education, medical, continuing”) OR (“undergraduate medical education”) OR (“postgraduate medical education”) OR (“nutrition education) OR “nutrition education” OR (“nutritional physiology+”) OR (“medical nutrition education”) AND (“nutrition”) OR “nutrition*” OR (“public health nutrition”) OR (“nutrition services+”) OR (“nutrition policy+”) OR (“diet”) OR “diet*” OR (“life style+”) OR “lifestyle”) AND ((competen*) OR (“clinical competence+”) OR “clinical competen*”) OR (“education, competency-based”) OR “competency-based education”) OR (“curriculum+”) OR “curricul*”) OR (“competency framework*” OR (“professional competence+”) OR (competency standard*))) | 2650    |
| <b>Embase</b>                     | (((doctor*) OR (physician* OR ‘physician’/exp) OR (‘hospital physician’/exp) OR (medical student* OR ‘medical student’/exp) OR ((medic* OR doctor* OR clinical*) NEAR/2 student*) OR (medical NEAR/3 (specialist* OR intern* OR resident*)) OR (specialist registrar* OR ‘medical specialist’/exp) OR (clinical specialist*) OR (medical education OR ‘medical education’/exp) OR (undergraduate medical education) OR (graduate medical education OR ‘residency education’/exp) OR (nutrition education OR ‘nutrition education’/exp OR ‘health education’/exp) OR (medical nutrition education)) AND ((nutrition* OR ‘nutrition’/exp OR ‘nutrition service’/exp) OR (diet* OR ‘diet’/exp) OR (lifestyle* OR ‘lifestyle’/exp OR ‘lifestyle modification’/exp)) AND ((competen* OR ‘competence’/exp) OR (clinical competen* OR ‘clinical competence’/exp) OR (curricul* OR ‘curriculum’/exp OR ‘medical school’/exp) OR (competency framework* OR ‘professional competence’/exp) OR (competency standard*)))                                                                                                              | 7695    |
| <b>Global Health</b>              | (((doctor* OR physician+) OR (medical student* OR medical students) OR ((medic* OR doctor* OR clinical*) N2 student*) OR ((general practitioner* OR gp* OR family doctor* OR family physician*) OR general practitioners) OR (medical N3 (specialist* OR intern* OR resident*)) OR (specialist registrar*) OR (clinical specialist*) OR (medical                                                                                                                                                                                                                                                                                                                                                                                                                                                                                                                                                                                                                                                                                                                                                                          | 1280    |

|                       |                                                                                                                                                                                                                                                                                                                                                                                                                                                                                                                                                                                                                                                                                                                                                                                                                                                                                                                                                                                                                     |      |
|-----------------------|---------------------------------------------------------------------------------------------------------------------------------------------------------------------------------------------------------------------------------------------------------------------------------------------------------------------------------------------------------------------------------------------------------------------------------------------------------------------------------------------------------------------------------------------------------------------------------------------------------------------------------------------------------------------------------------------------------------------------------------------------------------------------------------------------------------------------------------------------------------------------------------------------------------------------------------------------------------------------------------------------------------------|------|
|                       | education OR medical education+) OR (undergraduate medical education OR medical schools) OR (graduate medical education OR continuing education OR medicine+) OR (nutrition education) OR (medical nutrition education)) AND ((nutrition* OR nutrition+ OR nutrition programmes OR nutrition physiology OR nutrition planning OR nutrition information OR clinical nutrition OR community nutrition OR nutritional support OR nutritional intervention OR nutritional assessment) OR (diet* OR diet OR diet counselling OR diet planning) OR (lifestyle* OR lifestyle)) AND ((competen* OR professional competence) OR (clinical competen*) OR (competency-based education) OR (curricul* OR curriculum+ OR curriculum guides) OR (competency framework*) OR (competency standard*))                                                                                                                                                                                                                                |      |
| <b>Medline</b>        | ((("doctor*") OR ("physician*") OR ((medic* OR doctor* OR clinical*) NEAR/2 "student*") OR ("medical student*") OR ("general practitioner* OR gp* OR family doctor* OR family physician*") OR "physicians, family" OR "general practitioners") OR ((("medical NEAR/3 (specialist* OR intern* OR resident*") OR "internship and residency" OR "internal medicine+") OR ("specialist registrar*") OR ("clinical specialist*") OR ("medical education" OR "education, medical+" OR "education, medical, undergraduate+" OR "education, medical, continuing" OR "education, premedical") OR ("postgraduate medical education") OR ("nutrition education" OR "nutritional sciences+")) AND ((competen*) OR ("competency-based education" OR "clinical competence" OR "professional competence+") OR ("curricul*" OR "curriculum+") OR ("competency framework*") OR ("competency standard*")) AND ("nutrition*" OR "nutrition therapy+") OR ("diet*" OR "diet+" OR "diet therapy+") OR ("lifestyle*" OR "life style+")))) | 3605 |
| <b>Scopus</b>         | ((("doctor* OR ((medic* OR doctor* OR clinical*) W/2 student*) OR ("medical student") OR ("general practitioner*" OR gp* OR "family doctor*" OR "family physician*") OR (medical W/3 (specialist* OR intern* OR resident*)) OR (specialist registrar*) OR ("clinical specialist*") OR ("medical education") OR ("undergraduate medical education") OR ("postgraduate medical education")) AND ((nutrition*) OR (diet*) OR (lifestyle* OR "life style")) AND ((competen*) OR ("clinical competen*") OR ("competency-based education") OR (curricul*) OR ("competency framework") OR ("competency standard*"))))                                                                                                                                                                                                                                                                                                                                                                                                      | 2382 |
| <b>Web of Science</b> | ((("doctor*") OR (physician*) OR (medical student*) OR (student* NEAR/2 (medic* OR doctor* OR clinical*)) OR (general practitioner* OR gp OR family doctor* OR family physician*) OR (medical NEAR/3 (specialist* OR intern* OR resident*)) OR (specialist registrar*) OR (clinical                                                                                                                                                                                                                                                                                                                                                                                                                                                                                                                                                                                                                                                                                                                                 | 2097 |

|                                       |                                                                                                                                                                                                                                                                                                                                                                                                                |              |
|---------------------------------------|----------------------------------------------------------------------------------------------------------------------------------------------------------------------------------------------------------------------------------------------------------------------------------------------------------------------------------------------------------------------------------------------------------------|--------------|
|                                       | specialist*) OR (medical education) OR (undergraduate medical education) OR (postgraduate medical education) OR (nutrition education) OR (medical nutrition education)) AND ((nutrition*) OR (diet*) OR (lifestyle* OR life style)) AND ((competen*) OR (clinical competen*) OR (competency-based education) OR (curricul*) OR (competency frameworkl*) OR (professional competen*) OR (competency standard*)) |              |
| <b>Total yield from all databases</b> |                                                                                                                                                                                                                                                                                                                                                                                                                | <b>19709</b> |

For peer review only



## Supplementary Materials 2 – List of excluded studies along with reasons for exclusion

Full-text articles excluded, with reasons (n=45)

- Single site case study (n=7)
- Does not contain competencies or a framework (n=18)
- Not specific to nutrition / disease-specific (n=15)
- Review / Conference Proceedings (n=1)
- Unable to translate to English language (n=1)

| Study                                                   | Reason for Exclusion                                                                                    |
|---------------------------------------------------------|---------------------------------------------------------------------------------------------------------|
| Adams et al., 2010                                      | Does not contain competencies or a framework                                                            |
| Akner & Vessby, 1997                                    | Does not contain competencies or a framework                                                            |
| Al-Nimr et al., 2019                                    | Single site case study (Not formally adopted or endorsed)                                               |
| Asp et al., 1995                                        | Does not contain competencies or a framework                                                            |
| Aspry et al., 2018                                      | Framework not specific to nutrition (Competencies for ASCVD prevention)                                 |
| Bairey Merz et al., 2009                                | Framework not specific to nutrition (Competencies specific to the prevention of cardiovascular disease) |
| Bakemeier et al., 1989                                  | Framework not specific to nutrition (Nutrition and cancer education objectives)                         |
| Ball et al., 2010                                       | Single site case study (Not formally adopted or endorsed)                                               |
| Brodribb et al., 2012                                   | Framework not specific to nutrition (Competencies specific to breastfeeding)                            |
| Chamberlain et al., 1989                                | Does not contain competencies or a framework                                                            |
| Cooksey et al., 2000                                    | Does not contain competencies or a framework                                                            |
| Cresci et al., 2019                                     | Does not include competencies or a framework                                                            |
| Committee of the Nutrition Academic Award Program, 2002 | Does not contain competencies or a framework                                                            |
| Dahl, 2006                                              | Does not include competencies or a framework                                                            |
| Edwards & Rosenfeld, 2006                               | Single site case study (Not formally adopted or endorsed)                                               |
| Gallagher et al., 1979                                  | Does not contain competencies or a framework                                                            |
| Hark et al., 2000                                       | Single site case study (Not formally adopted or endorsed)                                               |
| Heimbürger, 2002                                        | Does not contain competencies or a framework                                                            |
| Heimbürger, 2006                                        | Does not contain competencies or a framework                                                            |
| Hivert et al., 2016                                     | Does not contain competencies or a framework                                                            |
| Huang et al., 2009                                      | Framework not specific to nutrition (Health and obesity: prevention and education curriculum)           |
| Jackson, 2001                                           | Review article                                                                                          |
| Jensen & Hesso, 1991                                    | Does not contain competencies or a framework                                                            |
| Kaye et al., 2018                                       | Does not contain competencies or a framework                                                            |
| Kelly et al., 2019                                      | Framework not specific to nutrition (Competencies for lifestyle medicine intensivists)                  |

|                                               |                                                                                                                           |
|-----------------------------------------------|---------------------------------------------------------------------------------------------------------------------------|
| Kligler et al., 2004                          | Framework not specific to nutrition (Competencies in integrative medicine)                                                |
| Kushner et al., 2019                          | Framework not specific to nutrition (Obesity competencies)                                                                |
| Lianov et al., 2010                           | Framework not specific to nutrition (Physician competencies for prescribing lifestyle medicine)                           |
| Lin et al., 1999                              | Unable to translate to English from Chinese                                                                               |
| Maiburg et al., 2004                          | Single site case study (Not formally adopted or endorsed)                                                                 |
| Milla, 2002                                   | Framework not specific to nutrition (European training syllabus in paediatric gastroenterology, hepatology and nutrition) |
| Mularski et al., 1997                         | Does not contain competencies or a framework                                                                              |
| Mulder et al., 2016                           | Single site case study (Not formally adopted or endorsed)                                                                 |
| Powell-Tuck et al., 1997                      | Does not contain competencies or a framework (course evaluation)                                                          |
| Ray et al., 2010                              | Does not contain competencies or a framework                                                                              |
| Rock et al., 1995                             | Does not contain competencies or a framework                                                                              |
| Rudolph et al., 1999                          | Framework not specific to nutrition (NASPGN guidelines for training in paediatric gastroenterology)                       |
| Ryen et al., 2003                             | Framework not specific to nutrition (Gastroenterology core curriculum)                                                    |
| Scolapio et al., 2008                         | Does not contain competencies or a framework                                                                              |
| Somannavar, 2012                              | Single site case study (Not formally adopted or endorsed)                                                                 |
| The Gastroenterology Leadership Council, 1996 | Framework not specific to nutrition (Gastroenterology core curriculum)                                                    |
| Trilk et al., 2019                            | Framework not specific to nutrition (Lifestyle medicine curriculum)                                                       |
| Weinsier et al., 1989                         | Does not contain competencies or a framework (Priority rankings for nutrition topics to be included in curriculum)        |
| Winick, 1993                                  | Does not contain competencies or a framework                                                                              |
| Withers et al., 2019                          | Framework not specific to nutrition (Core competencies in global health training)                                         |
