# Supplementary material for: Nutrition competencies for medicine: an integrative review and critical synthesis
Source: PubMed Central journal article supplement — BMJ Open. 2021 Mar 25;11(3):e043066. doi: 10.1136/bmjopen-2020-043066 (PMC7996665; doi:10.1136/bmjopen-2020-043066), 2021-03-25
Supplement: bmjopen-2020-043066supp001.pdf [file bmjopen-2020-043066supp001.pdf]

## Supplementary Materials 1 – Search Strategy

| Data base                         | Search terms                                                                                                                                                                                                                                                                                                                                                                                                                                                                                                                                                                                                                                                                                                                                                                                                                                                                                                                                                                                                                                                                                                                                           | Results |
|-----------------------------------|--------------------------------------------------------------------------------------------------------------------------------------------------------------------------------------------------------------------------------------------------------------------------------------------------------------------------------------------------------------------------------------------------------------------------------------------------------------------------------------------------------------------------------------------------------------------------------------------------------------------------------------------------------------------------------------------------------------------------------------------------------------------------------------------------------------------------------------------------------------------------------------------------------------------------------------------------------------------------------------------------------------------------------------------------------------------------------------------------------------------------------------------------------|---------|
| <b>CINAHL Plus with Full Text</b> | ((("doctor*" OR ("physicians+")) OR ("medical student*")) OR ((("students, medical") OR ("medic* OR doctor* OR clinical*) N2 student*)) OR ((("general practitioner" OR family doctor* OR family physician*)) OR ("physicians, family")) OR ((("interns and residents") OR "medical N3 (specialist* OR intern* OR resident*))) OR (specialist registrar*) OR (clinical specialist*) OR ((("education, medical+") OR "medical education" OR ("education, medical, continuing")) OR ("undergraduate medical education") OR ("postgraduate medical education") OR ((("nutrition education) OR "nutrition education" OR ("nutritional physiology+")) OR ("medical nutrition education") AND ((("nutrition") OR "nutrition*" OR ("public health nutrition") OR ("nutrition services+") OR ("nutrition policy+")) OR ((("diet") OR "diet*") OR ((("life style+") OR "lifestyle") AND ((competen*) OR ((("clinical competence+") OR "clinical competen*") OR ((("education, competency-based") OR "competency-based education") OR ((("curriculum+") OR "curricul*") OR ("competency framework*" OR ("professional competence+")) OR (competency standard*))) | 2650    |
| <b>Embase</b>                     | ((("doctor* OR (physician* OR 'physician'/exp) OR ('hospital physician'/exp) OR (medical student* OR 'medical student'/exp) OR ((("medic* OR doctor* OR clinical*) NEAR/2 student*) OR (medical NEAR/3 (specialist* OR intern* OR resident*)) OR (specialist registrar* OR 'medical specialist'/exp) OR (clinical specialist*) OR (medical education OR 'medical education'/exp) OR (undergraduate medical education) OR (graduate medical education OR 'residency education'/exp) OR (nutrition education OR 'nutrition education'/exp OR 'health education'/exp) OR (medical nutrition education)) AND ((("nutrition* OR 'nutrition'/exp OR 'nutrition service'/exp) OR (diet* OR 'diet'/exp) OR (lifestyle* OR 'lifestyle'/exp OR 'lifestyle modification'/exp)) AND ((("competen* OR 'competence'/exp) OR (clinical competen* OR 'clinical competence'/exp) OR (curricul* OR 'curriculum'/exp OR 'medical school'/exp) OR (competency framework* OR 'professional competence'/exp) OR (competency standard*)))                                                                                                                                     | 7695    |
| <b>Global Health</b>              | ((("doctor* OR physician+") OR (medical student* OR medical students) OR ((("medic* OR doctor* OR clinical*) N2 student*) OR ((("general practitioner* OR gp* OR family doctor* OR family physician*) OR general practitioners) OR (medical N3 (specialist* OR intern* OR resident*)) OR (specialist registrar*) OR (clinical specialist*) OR (medical                                                                                                                                                                                                                                                                                                                                                                                                                                                                                                                                                                                                                                                                                                                                                                                                 | 1280    |

|                       |                                                                                                                                                                                                                                                                                                                                                                                                                                                                                                                                                                                                                                                                                                                                                                                                                                                                                                                                                                                                                    |      |
|-----------------------|--------------------------------------------------------------------------------------------------------------------------------------------------------------------------------------------------------------------------------------------------------------------------------------------------------------------------------------------------------------------------------------------------------------------------------------------------------------------------------------------------------------------------------------------------------------------------------------------------------------------------------------------------------------------------------------------------------------------------------------------------------------------------------------------------------------------------------------------------------------------------------------------------------------------------------------------------------------------------------------------------------------------|------|
|                       | education OR medical education+) OR (undergraduate medical education OR medical schools) OR (graduate medical education OR continuing education OR medicine+) OR (nutrition education) OR (medical nutrition education)) AND ((nutrition* OR nutrition+ OR nutrition programmes OR nutrition physiology OR nutrition planning OR nutrition information OR clinical nutrition OR community nutrition OR nutritional support OR nutritional intervention OR nutritional assessment) OR (diet* OR diet OR diet counselling OR diet planning) OR (lifestyle* OR lifestyle)) AND ((competen* OR professional competence) OR (clinical competen*) OR (competency-based education) OR (curricul* OR curriculum+ OR curriculum guides) OR (competency framework*) OR (competency standard*))                                                                                                                                                                                                                               |      |
| <b>Medline</b>        | ((("doctor*") OR ("physician*") OR ((medic* OR doctor* OR clinical*) NEAR/2 "student*") OR ("medical student*") OR ("general practitioner* OR gp* OR family doctor* OR family physician*") OR "physicians, family" OR "general practitioners") OR ((("medical NEAR/3 (specialist* OR intern* OR resident*") OR "internship and residency" OR "internal medicine+") OR ("specialist registrar*") OR ("clinical specialist*") OR ("medical education" OR "education, medical+" OR "education, medical, undergraduate+" OR "education, medical, continuing" OR "education, premedical") OR ("postgraduate medical education") OR ("nutrition education" OR "nutritional sciences+")) AND ((competen* OR ("competency-based education" OR "clinical competence" OR "professional competence+") OR ("curricul*" OR "curriculum+") OR ("competency framework*") OR ("competency standard*")) AND ("nutrition*" OR "nutrition therapy+") OR ("diet*" OR "diet+" OR "diet therapy+") OR ("lifestyle*" OR "life style+")))) | 3605 |
| <b>Scopus</b>         | ((("doctor* OR ((medic* OR doctor* OR clinical*) W/2 student*) OR ("medical student") OR ("general practitioner*" OR gp* OR "family doctor*" OR "family physician*") OR (medical W/3 (specialist* OR intern* OR resident*)) OR (specialist registrar*) OR ("clinical specialist*") OR ("medical education") OR ("undergraduate medical education") OR ("postgraduate medical education")) AND ((nutrition*) OR (diet*) OR (lifestyle* OR "life style")) AND ((competen* OR ("clinical competen*") OR ("competency-based education") OR (curricul*) OR ("competency framework") OR ("competency standard*"))))                                                                                                                                                                                                                                                                                                                                                                                                      | 2382 |
| <b>Web of Science</b> | ((("doctor*") OR (physician*) OR (medical student*) OR (student* NEAR/2 (medic* OR doctor* OR clinical*)) OR (general practitioner* OR gp OR family doctor* OR family physician*) OR (medical NEAR/3 (specialist* OR intern* OR resident*)) OR (specialist registrar*) OR (clinical                                                                                                                                                                                                                                                                                                                                                                                                                                                                                                                                                                                                                                                                                                                                | 2097 |

|                                       |                                                                                                                                                                                                                                                                                                                                                                                                                |              |
|---------------------------------------|----------------------------------------------------------------------------------------------------------------------------------------------------------------------------------------------------------------------------------------------------------------------------------------------------------------------------------------------------------------------------------------------------------------|--------------|
|                                       | specialist*) OR (medical education) OR (undergraduate medical education) OR (postgraduate medical education) OR (nutrition education) OR (medical nutrition education)) AND ((nutrition*) OR (diet*) OR (lifestyle* OR life style)) AND ((competen*) OR (clinical competen*) OR (competency-based education) OR (curricul*) OR (competency frameworkl*) OR (professional competen*) OR (competency standard*)) |              |
| <b>Total yield from all databases</b> |                                                                                                                                                                                                                                                                                                                                                                                                                | <b>19709</b> |
