# Supplementary material for: Nutrition competencies for medicine: an integrative review and critical synthesis
Source: PubMed Central journal article supplement — BMJ Open. 2021 Mar 25;11(3):e043066. doi: 10.1136/bmjopen-2020-043066 (PMC7996665; doi:10.1136/bmjopen-2020-043066), 2021-03-25
Supplement: bmjopen-2020-043066supp002.pdf [file bmjopen-2020-043066supp002.pdf]

## Supplementary Materials 2 – List of excluded studies along with reasons for exclusion

Full-text articles excluded, with reasons (n=45)

- Single site case study (n=7)
- Does not contain competencies or a framework (n=18)
- Not specific to nutrition / disease-specific (n=15)
- Review / Conference Proceedings (n=1)
- Unable to translate to English language (n=1)

| Study                                                   | Reason for Exclusion                                                                                    |
|---------------------------------------------------------|---------------------------------------------------------------------------------------------------------|
| Adams et al., 2010                                      | Does not contain competencies or a framework                                                            |
| Akner & Vessby, 1997                                    | Does not contain competencies or a framework                                                            |
| Al-Nimr et al., 2019                                    | Single site case study (Not formally adopted or endorsed)                                               |
| Asp et al., 1995                                        | Does not contain competencies or a framework                                                            |
| Aspry et al., 2018                                      | Framework not specific to nutrition (Competencies for ASCVD prevention)                                 |
| Bairey Merz et al., 2009                                | Framework not specific to nutrition (Competencies specific to the prevention of cardiovascular disease) |
| Bakemeier et al., 1989                                  | Framework not specific to nutrition (Nutrition and cancer education objectives)                         |
| Ball et al., 2010                                       | Single site case study (Not formally adopted or endorsed)                                               |
| Brodribb et al., 2012                                   | Framework not specific to nutrition (Competencies specific to breastfeeding)                            |
| Chamberlain et al., 1989                                | Does not contain competencies or a framework                                                            |
| Cooksey et al., 2000                                    | Does not contain competencies or a framework                                                            |
| Cresci et al., 2019                                     | Does not include competencies or a framework                                                            |
| Committee of the Nutrition Academic Award Program, 2002 | Does not contain competencies or a framework                                                            |
| Dahl, 2006                                              | Does not include competencies or a framework                                                            |
| Edwards & Rosenfeld, 2006                               | Single site case study (Not formally adopted or endorsed)                                               |
| Gallagher et al., 1979                                  | Does not contain competencies or a framework                                                            |
| Hark et al., 2000                                       | Single site case study (Not formally adopted or endorsed)                                               |
| Heimbürger, 2002                                        | Does not contain competencies or a framework                                                            |
| Heimbürger, 2006                                        | Does not contain competencies or a framework                                                            |
| Hivert et al., 2016                                     | Does not contain competencies or a framework                                                            |
| Huang et al., 2009                                      | Framework not specific to nutrition (Health and obesity: prevention and education curriculum)           |
| Jackson, 2001                                           | Review article                                                                                          |
| Jensen & Hessov, 1991                                   | Does not contain competencies or a framework                                                            |
| Kaye et al., 2018                                       | Does not contain competencies or a framework                                                            |
| Kelly et al., 2019                                      | Framework not specific to nutrition (Competencies for lifestyle medicine intensivists)                  |

|                                               |                                                                                                                           |
|-----------------------------------------------|---------------------------------------------------------------------------------------------------------------------------|
| Kligler et al., 2004                          | Framework not specific to nutrition (Competencies in integrative medicine)                                                |
| Kushner et al., 2019                          | Framework not specific to nutrition (Obesity competencies)                                                                |
| Lianov et al., 2010                           | Framework not specific to nutrition (Physician competencies for prescribing lifestyle medicine)                           |
| Lin et al., 1999                              | Unable to translate to English from Chinese                                                                               |
| Maiburg et al., 2004                          | Single site case study (Not formally adopted or endorsed)                                                                 |
| Milla, 2002                                   | Framework not specific to nutrition (European training syllabus in paediatric gastroenterology, hepatology and nutrition) |
| Mularski et al., 1997                         | Does not contain competencies or a framework                                                                              |
| Mulder et al., 2016                           | Single site case study (Not formally adopted or endorsed)                                                                 |
| Powell-Tuck et al., 1997                      | Does not contain competencies or a framework (course evaluation)                                                          |
| Ray et al., 2010                              | Does not contain competencies or a framework                                                                              |
| Rock et al., 1995                             | Does not contain competencies or a framework                                                                              |
| Rudolph et al., 1999                          | Framework not specific to nutrition (NASPGN guidelines for training in paediatric gastroenterology)                       |
| Ryen et al., 2003                             | Framework not specific to nutrition (Gastroenterology core curriculum)                                                    |
| Scolapio et al., 2008                         | Does not contain competencies or a framework                                                                              |
| Somannavar, 2012                              | Single site case study (Not formally adopted or endorsed)                                                                 |
| The Gastroenterology Leadership Council, 1996 | Framework not specific to nutrition (Gastroenterology core curriculum)                                                    |
| Trilk et al., 2019                            | Framework not specific to nutrition (Lifestyle medicine curriculum)                                                       |
| Weinsier et al., 1989                         | Does not contain competencies or a framework (Priority rankings for nutrition topics to be included in curriculum)        |
| Winick, 1993                                  | Does not contain competencies or a framework                                                                              |
| Withers et al., 2019                          | Framework not specific to nutrition (Core competencies in global health training)                                         |
